# Supplementary material
Source: PubMed Central journal article supplement (PMC2629660)
Supplement: NIHMS83527-supplement-Supplementary.pdf [file NIHMS83527-supplement-Supplementary.pdf]

## **SUPPLEMENTAL DATA**

**PHENOTYPIC DIFFERENCES BETWEEN HEALTHY EFFECTOR CTL AND LEUKEMIC LGL CELLS SUPPORT THE NOTION OF ANTIGEN-TRIGGERED CLONAL TRANSFORMATION IN T-LGL LEUKEMIA.**

**<sup>1,2</sup> Marcin W. Wlodarski, <sup>1</sup> Zachary Nearman, <sup>1</sup> Anna Jankowska, <sup>2</sup> Nina Babel, <sup>1</sup> Jennifer Powers,  
<sup>2</sup> Hans-Dieter Volk, <sup>3</sup> Patrick Leahy and <sup>1</sup> Jaroslaw P. Maciejewski**

<sup>1</sup> Experimental Hematology and Hematopoiesis Section, Taussig Cancer Center, Cleveland Clinic Foundation, Cleveland, Ohio

<sup>2</sup> Institute of Medical Immunology, Charite Medical School, Berlin, Germany

<sup>3</sup> Gene Expression Array Core Facility, Case Western Reserve University, Cleveland, Ohio

**List of transcripts concordantly up- and downregulated in all three LGL patients vs. healthy effector CD8+CD57+ population (pages 2-14).**

FC indicates foldchange in transcript expression in patient sample when compared to control CD57+ cells; I/D, increase/decrease in transcript expression; A, absent signal; NC, no change in signal ratio.

| AFFYMETRIX PROBE SET ID    | GENE SYMBOL         | GENE TITLE                                                | FC#22  | I/D | FC#2   | I/D | FC#26   | I/D |
|----------------------------|---------------------|-----------------------------------------------------------|--------|-----|--------|-----|---------|-----|
| AFFX-r2-Bs-dap-5_at        | ---                 | ---                                                       | 256.00 |     | 207.94 |     | 1176.27 |     |
| AFFX-DapX-M_at             | ---                 | ---                                                       | 147.03 |     | 111.43 |     | 630.35  |     |
| AFFX-DapX-5_at             | ---                 | ---                                                       | 90.51  |     | 103.97 |     | 315.17  |     |
| AFFX-r2-Bs-dap-M_at        | ---                 | ---                                                       | 84.45  |     | 48.50  |     | 388.02  |     |
| AFFX-r2-Bs-dap-3_at        | ---                 | ---                                                       | 59.71  |     | 48.50  |     | 362.04  |     |
| 204533_at                  | CXCL10/IP-10/SCYB10 | chemokine (C-X-C motif) ligand 10                         | 48.50  |     | 137.19 |     | 9.24    |     |
| AFFX-ThrX-3_at             | ---                 | ---                                                       | 45.25  |     | 51.98  |     | 415.87  |     |
| AFFX-DapX-3_at             | ---                 | ---                                                       | 45.25  |     | 39.40  |     | 256.00  |     |
| 241343_at                  | RNASEH1             | Ribonuclease H1                                           | 45.25  |     | 22.63  |     | 34.30   |     |
| 228266_s_at                | HDGFRP3             | hepatoma-derived growth factor, related protein 3         | 36.76  |     | 25.99  |     | 34.30   |     |
| 213831_at                  | HLA-DQA1            | major histocompatibility complex, class II, DQ alpha 1    | 34.30  |     | 51.98  |     | 8.00    |     |
| 205461_at                  | RAB35               | RAB35, member RAS oncogene family                         | 34.30  |     | 39.40  |     | 19.70   |     |
| 227404_s_at                | EGR1                | Early growth response 1                                   | 29.86  |     | 17.15  |     | 14.93   |     |
| 202411_at                  | IFI27               | interferon, alpha-inducible protein 27                    | 29.86  |     | 59.71  |     | 11.79   |     |
| 1570541_s_at               | LOC400759           | Similar to calpain (EC 3.4.22.17) light chain - bovine    | 21.11  |     | 39.40  |     | 7.46    |     |
| 231819_at                  | CEBPZ               | CCAAT/enhancer binding protein zeta                       | 19.70  |     | 14.93  |     | 24.25   |     |
| 201551_s_at                | LAMP1               | lysosomal-associated membrane protein 1                   | 19.70  |     | 22.63  |     | 6.50    |     |
| 205249_at                  | EGR2                | early growth response 2 (Krox-20 homolog, Drosophila)     | 18.38  |     | 9.19   |     | 2.00    |     |
| AFFX-r2-Bs-thr-M_s_at      | ---                 | ---                                                       | 17.15  |     | 10.56  |     | 29.86   |     |
| 209480_at                  | HLA-DQB1            | Major histocompatibility complex, class II, DQ beta 1     | 17.15  |     | 17.15  |     | 3.48    |     |
| AFFX-r2-Bs-thr-5_s_at      | ---                 | ---                                                       | 14.93  |     | 17.15  |     | 48.50   |     |
| 210077_s_at                | SFRS5               | splicing factor, arginine/serine-rich 5                   | 14.93  |     | 34.30  |     | 4.00    |     |
| AFFX-HUMISGF3A/M97935_5_at | STAT1               | signal transducer and activator of transcription 1, 91kDa | 14.93  |     | 16.00  |     | 2.30    |     |
| 202672_s_at                | ATF3                | activating transcription factor 3                         | 13.93  |     | 25.99  |     | 10.56   |     |
| 236203_at                  | HLA-DQA1            | Major histocompatibility complex, class II, DQ alpha 1    | 13.93  |     | 42.22  |     | 7.46    |     |
| 200796_s_at                | MCL1                | myeloid cell leukemia sequence 1 (BCL2-related)           | 13.93  |     | 17.15  |     | 3.48    |     |
| 238850_at                  | ---                 | CDNA FLJ30810 fis, clone FEBRA2001440                     | 12.13  |     | 6.96   |     | 39.40   |     |
| 1558214_s_at               | CTNNA1              | catenin (cadherin-associated protein), alpha 1, 102kDa    | 12.13  |     | 10.56  |     | 3.03    |     |
| 201694_s_at                | EGR1                | early growth response 1                                   | 12.13  |     | 8.00   |     | 2.83    |     |
| 210354_at                  | IFNG                | interferon, gamma                                         | 12.13  |     | 13.00  |     | 25.99   |     |
| 211506_s_at                | IL8 (CXCL8)         | interleukin 8                                             | 12.13  |     | 34.30  |     | 1.74    |     |
| 233406_at                  | KIAA0256            | KIAA0256 gene product                                     | 11.31  |     | 14.93  |     | 5.28    |     |
| 1553176_at                 | SH2D1B              | SH2 domain containing 1B                                  | 11.31  |     | 5.66   |     | 11.31   |     |
| 210895_s_at                | CD86 (CD28 ligand)  | CD86 molecule                                             | 10.56  |     | 29.86  |     |         | NC  |
| 238900_at                  | HLA-DRB1            | major histocompatibility complex, class II, DR beta 1     | 10.56  |     | 39.40  |     | 2.83    |     |
| AFFX-r2-Bs-phe-5_at        | ---                 | ---                                                       | 9.85   |     | 13.93  |     | 48.50   |     |
| AFFX-LysX-3_at             | ---                 | ---                                                       | 9.85   |     | 8.00   |     | 27.86   |     |
| 1562836_at                 | DDX6                | DEAD (Asp-Glu-Ala-Asp) box polypeptide 6                  | 9.85   |     | 5.66   |     | 2.14    |     |
| 212999_x_at                | HLA-DQB1            | Major histocompatibility complex, class II, DQ beta 1     | 9.85   |     | 17.15  |     | 2.14    |     |
| 216901_s_at                | ZNFN1A1             | zinc finger protein, subfamily 1A, 1 (Ikaros)             | 9.85   |     | 13.00  |     | 3.03    |     |
| AFFX-ThrX-M_at             | ---                 | ---                                                       | 9.19   |     | 7.46   |     | 45.25   |     |
| 230272_at                  | ---                 | CDNA FLJ30810 fis, clone FEBRA2001440                     | 9.19   |     | 4.59   |     | 21.11   |     |
| 205685_at                  | CD86 (CD28 ligand)  | CD86 molecule                                             | 9.19   |     | 16.00  |     | 4.70    |     |
| 201422_at                  | IFI30               | interferon, gamma-inducible protein 30                    | 9.19   |     | 19.70  |     |         | NC  |
| 232352_at                  | ISL2                | ISL2 transcription factor, LIM/homeodomain, (islet-2)     | 9.19   |     | 6.50   |     | 6.96    |     |
| 212099_at                  | RHOB                | ras homolog gene family, member B                         | 9.19   |     | 18.38  |     | 3.25    |     |
| 205727_at                  | TEP1                | telomerase-associated protein 1                           | 9.19   |     | 14.93  |     | 6.96    |     |
| 201044_x_at                | DUSP1               | dual specificity phosphatase 1                            | 8.57   |     | 19.70  |     | 2.14    |     |

| AFFYMETRIX PROBE SET ID     | GENE SYMBOL      | GENE TITLE                                                                                   | FC#22 | I/D | FC#2  | I/D | FC#26  | I/D |
|-----------------------------|------------------|----------------------------------------------------------------------------------------------|-------|-----|-------|-----|--------|-----|
| 204006_s_at                 | FCGR3A           | Fc fragment of IgG, low affinity IIIa/iiiB, receptor (CD16a/CD16b)                           | 8.57  |     | 10.56 |     | 3.25   |     |
| 206917_at                   | GNA13            | guanine nucleotide binding protein (G protein), alpha 13                                     | 8.57  |     | 13.93 |     | 4.00   |     |
| 200628_s_at                 | WARS             | tryptophanyl-tRNA synthetase                                                                 | 8.57  |     | 19.70 |     | 2.30   |     |
| 223383_at                   | ZNRF1            | zinc and ring finger 1                                                                       | 8.57  |     | 5.28  |     | 12.13  |     |
| 1555594_a_at                | MBNL1            | muscleblind-like (Drosophila)                                                                | 8.00  |     | 7.46  |     | 2.83   |     |
| 204834_at                   | FGL2             | fibrinogen-like 2                                                                            | 7.46  |     | 13.00 |     | 3.03   |     |
| 231578_at                   | GBP1             | guanylate binding protein 1, interferon-inducible, 67kDa                                     | 7.46  |     | 9.85  |     | 6.50   |     |
| 1555628_a_at                | HAVCR2           | hepatitis A virus cellular receptor 2                                                        | 7.46  |     | 5.28  |     | 6.96   |     |
| 242587_at                   | SLC9A9           | solute carrier family 9, member 9                                                            | 7.46  |     | 7.46  |     | 3.03   |     |
| 217853_at                   | TENS1            | Tensin 3                                                                                     | 7.46  |     | 16.00 |     | 19.70  |     |
| 201693_s_at                 | EGR1             | early growth response 1                                                                      | 6.96  |     | 5.28  |     | 2.30   |     |
| 217202_s_at                 | GLUL             | glutamate-ammonia ligase (glutamine synthetase)                                              | 6.96  |     | 9.19  |     | 2.30   |     |
| 200648_s_at                 | GLUL             | glutamate-ammonia ligase (glutamine synthetase)                                              | 6.96  |     | 9.85  |     | 2.30   |     |
| 236244_at                   | HNRPU            | Heterogeneous nuclear ribonucleoprotein U (scaffold attachment factor A)                     | 6.96  |     | 21.11 |     | 4.29   |     |
| 1554508_at                  | PIK3AP1          | phosphoinositide-3-kinase adaptor protein 1                                                  | 6.96  |     | 6.96  |     | 3.73   |     |
| 202859_x_at                 | IL8 (CXCL8)      | interleukin 8                                                                                | 6.50  |     | 16.00 |     | A      | NC  |
| 218850_s_at                 | LIMD1            | LIM domains containing 1                                                                     | 6.50  |     | 4.00  |     | 2.83   |     |
| 231576_at                   | ---              | MRNA; cDNA DKFZp566C034 (from clone DKFZp566C034)                                            | 6.06  |     | 4.92  |     | 4.92   |     |
| 241869_at                   | APOL6            | apolipoprotein L, 6                                                                          | 6.06  |     | 7.46  |     | 9.19   |     |
| 208116_s_at                 | MAN1A1           | mannosidase, alpha, class 1A, member 1                                                       | 6.06  |     | 3.25  |     | 4.29   |     |
| 1557637_at                  | PPP3CA           | Protein phosphatase 3, catalytic subunit, alpha isoform (calcineurin A alpha)                | 6.06  |     | 11.31 |     | 8.57   |     |
| AFFX-HUMISGF3A/M97935_MA_at | STAT1            | signal transducer and activator of transcription 1, 91kDa                                    | 6.06  |     | 5.28  |     | 3.03   |     |
| 1569003_at                  | TMEM49           | transmembrane protein 49                                                                     | 6.06  |     | 9.19  |     | 4.59   |     |
| 203915_at                   | CXCL9/MIG        | chemokine (C-X-C motif) ligand 9                                                             | 5.89  |     | 18.38 |     | NC     | NC  |
| 211559_s_at                 | CCNG2            | cyclin G2                                                                                    | 5.66  |     | 3.73  |     | 2.00   |     |
| 213548_s_at                 | H41              | hypothetical protein H41                                                                     | 5.66  |     | 8.00  |     | 2.83   |     |
| 208949_s_at                 | LGALS3 /// GALIG | lectin, galactoside-binding, soluble, 3 (galectin 3) /// galectin-3 internal gene            | 5.66  |     | 10.56 |     | 3.73   |     |
| 238013_at                   | PLEKHA2          | pleckstrin homology domain containing, family A (phosphoinositide binding specific) member 2 | 5.66  |     | 4.92  |     | 5.66   |     |
| 206221_at                   | RASA3            | RAS p21 protein activator 3                                                                  | 5.66  |     | 4.29  |     | 6.06   |     |
| 213435_at                   | SATB2            | SATB family member 2                                                                         | 5.66  |     | 2.46  |     | 18.38  |     |
| 1552928_s_at                | TAB3             | TAK1-binding protein 3                                                                       | 5.66  |     | 6.96  |     | 3.73   |     |
| AFFX-PheX-3_at              | ---              | ---                                                                                          | 5.28  |     | 6.06  |     | 14.93  |     |
| 207794_at                   | CCR2             | chemokine (C-C motif) receptor 2                                                             | 5.28  |     | 3.48  |     | -39.40 | D   |
| 1554279_a_at                | CXorf34          | chromosome X open reading frame 34                                                           | 5.28  |     | 3.48  |     | 4.00   |     |
| 206582_s_at                 | GPR56            | G protein-coupled receptor 56                                                                | 5.28  |     | 4.00  |     | 8.57   |     |
| 203293_s_at                 | LMAN1            | lectin, mannose-binding, 1                                                                   | 5.28  |     | 4.29  |     | 4.29   |     |
| 224917_at                   | MIRN21           | microRNA 21                                                                                  | 5.28  |     | 8.57  |     | 3.73   |     |
| 238421_at                   | MNAB             | Membrane associated DNA binding protein                                                      | 5.28  |     | 4.00  |     | 3.03   |     |
| 217095_x_at                 | NCR1             | natural cytotoxicity triggering receptor 1                                                   | 5.28  |     | 3.03  |     | 4.29   |     |
| 214971_s_at                 | ST6GAL1          | ST6 beta-galactosamide alpha-2,6-sialyltransferase 1                                         | 5.28  |     | 4.29  |     | 2.00   |     |
| 206307_s_at                 | FOXD1            | forkhead box D1                                                                              | 4.92  |     | 2.14  |     | 6.96   |     |
| 221185_s_at                 | IQCG             | IQ motif containing G                                                                        | 4.92  |     | 2.30  |     | 2.83   |     |
| 200787_s_at                 | PEA15            | phosphoprotein enriched in astrocytes 15                                                     | 4.92  |     | 13.00 |     | 2.00   |     |
| 216915_s_at                 | PTPN12           | protein tyrosine phosphatase, non-receptor type 12                                           | 4.92  |     | 4.00  |     | 4.00   |     |
| 244043_at                   | TFDP2            | Transcription factor Dp-2 (E2F dimerization partner 2)                                       | 4.92  |     | 3.48  |     | 9.85   |     |
| 207536_s_at                 | TNFRSF9          | tumor necrosis factor receptor superfamily, member 9                                         | 4.92  |     | 2.00  |     | 8.00   |     |
| 218832_x_at                 | ARRB1            | arrestin, beta 1                                                                             | 4.59  |     | 6.06  |     | 2.83   |     |
| 207686_s_at                 | CASP8            | caspase 8, apoptosis-related cysteine peptidase                                              | 4.59  |     | 3.73  |     | 2.83   |     |
| 205238_at                   | CXorf34          | chromosome X open reading frame 34                                                           | 4.59  |     | 5.28  |     | 4.92   |     |
| 211395_x_at                 | FCGR2C           | Fc fragment of IgG, low affinity IIc, receptor for (CD32)                                    | 4.59  |     | 16.00 |     | 4.00   |     |
| 238585_at                   | GTDC1            | glycosyltransferase-like domain containing 1                                                 | 4.59  |     | 3.48  |     | 2.00   |     |
| 209526_s_at                 | HDGFRP3          | hepatoma-derived growth factor, related protein 3                                            | 4.59  |     | 4.92  |     | 9.19   |     |
| 201466_s_at                 | JUN              | v-jun sarcoma virus 17 oncogene homolog (avian)                                              | 4.59  |     | 18.38 |     | 4.59   |     |
| 215415_s_at                 | LYST             | lysosomal trafficking regulator                                                              | 4.59  |     | 4.92  |     | 4.29   |     |
| 207659_s_at                 | MOBP             | myelin-associated oligodendrocyte basic protein                                              | 4.59  |     | 8.00  |     | 9.85   |     |
| 215233_at                   | PTDSR            | phosphatidylserine receptor                                                                  | 4.59  |     | 6.06  |     | 9.85   |     |
| 214697_s_at                 | ROD1             | ROD1 regulator of differentiation 1 (S. pombe)                                               | 4.59  |     | 3.48  |     | 2.00   |     |
| 238420_at                   | ---              | CDNA clone IMAGE:4285619                                                                     | 4.29  |     | 4.59  |     | 2.30   |     |
| 1568768_s_at                | BRE              | brain and reproductive organ-expressed (TNFRSF1A modulator)                                  | 4.29  |     | 8.57  |     | 2.83   |     |
| 233009_at                   | C10orf118        | Chromosome 10 open reading frame 118                                                         | 4.29  |     | 9.19  |     | 8.00   |     |
| 203799_at                   | CD302            | CD302 molecule                                                                               | 4.29  |     | 8.57  |     |        | NC  |
| 202902_s_at                 | CTSS             | cathepsin S                                                                                  | 4.29  |     | 6.96  |     | 2.00   |     |

| AFFYMETRIX PROBE SET ID     | GENE SYMBOL        | GENE TITLE                                                                                 | FC#22 | I/D | FC#2  | I/D | FC#26  | I/D |
|-----------------------------|--------------------|--------------------------------------------------------------------------------------------|-------|-----|-------|-----|--------|-----|
| 212107_s_at                 | DHX9               | DEAH (Asp-Glu-Ala-His) box polypeptide 9                                                   | 4.29  |     | 3.03  |     | 2.46   |     |
| 229450_s_at                 | IFIT3              | interferon-induced protein with tetratricopeptide repeats 3                                | 4.29  |     | 2.83  |     | 2.83   |     |
| 200906_s_at                 | KIAA0992           | palladin                                                                                   | 4.29  |     | 2.64  |     | 3.25   |     |
| 225408_at                   | MBP                | myelin basic protein                                                                       | 4.29  |     | 3.03  |     | 3.03   |     |
| 225742_at                   | Mdm4               | Mdm4, transformed 3T3 cell double minute 4, p53 binding protein (mouse)                    | 4.29  |     | 6.06  |     | 4.92   |     |
| 200604_s_at                 | PRKAR1A            | protein kinase, cAMP-dependent, regulatory, type I, alpha (tissue specific extinguisher 1) | 4.29  |     | 4.00  |     | 2.46   |     |
| 227824_at                   | PRKCB1             | Protein kinase C, beta 1                                                                   | 4.29  |     | 3.48  |     | 2.00   |     |
| 206220_s_at                 | RASA3              | RAS p21 protein activator 3                                                                | 4.29  |     | 3.48  |     | 3.25   |     |
| AFFX-HUMISGF3A/M97935_MB_at | STAT1              | signal transducer and activator of transcription 1, 91kDa                                  | 4.29  |     | 3.73  |     | 2.46   |     |
| 211786_at                   | TNFRSF9            | tumor necrosis factor receptor superfamily, member 9                                       | 4.29  |     | 3.73  |     | 4.00   |     |
| 222563_s_at                 | TNKS2              | tankyrase, TRF1-interacting ankyrin-related ADP-ribose polymerase 2                        | 4.29  |     | 4.59  |     | 2.00   |     |
| 200629_at                   | WARS               | tryptophanyl-tRNA synthetase                                                               | 4.29  |     | 10.56 |     | 2.00   |     |
| 205153_s_at                 | CD40(TNFRSF5)      | CD40 molecule, TNF receptor superfamily member 5                                           | 4.01  |     | 8.57  |     | A      | NC  |
| 1569106_s_at                | FLJ10707           | hypothetical protein FLJ10707                                                              | 4.00  |     | 3.48  |     | 2.00   |     |
| 216693_x_at                 | HDGFRP3            | hepatoma-derived growth factor, related protein 3                                          | 4.00  |     | 4.59  |     | 5.66   |     |
| 218280_x_at                 | HIST2H2AA          | histone 2, H2aa                                                                            | 4.00  |     | 5.66  |     | 3.25   |     |
| 214290_s_at                 | HIST2H2AA          | histone 2, H2aa                                                                            | 4.00  |     | 5.28  |     | 3.03   |     |
| 241716_at                   | HSPD1              | heat shock 60kDa protein 1 (chaperonin)                                                    | 4.00  |     | 12.13 |     | 147.03 |     |
| 214007_s_at                 | PTK9               | PTK9 protein tyrosine kinase 9                                                             | 4.00  |     | 6.06  |     | 2.83   |     |
| 202388_at                   | RGS2               | regulator of G-protein signalling 2, 24kDa                                                 | 4.00  |     | 5.66  |     | 4.29   |     |
| 244377_at                   | SLC1A4             | Solute carrier family 1, member 4                                                          | 4.00  |     | 3.03  |     | 4.59   |     |
| 223131_s_at                 | TRIM8              | tripartite motif-containing 8                                                              | 4.00  |     | 2.83  |     | 2.64   |     |
| 201337_s_at                 | VAMP3              | vesicle-associated membrane protein 3 (cellubrevin)                                        | 4.00  |     | 6.06  |     | 2.46   |     |
| AFFX-LysX-5_at              | ---                | ---                                                                                        | 3.73  |     | 3.25  |     | 9.85   |     |
| 243495_s_at                 | ---                | CDNA FLJ36515 fis, clone TRACH2001810                                                      | 3.73  |     | 3.25  |     | 2.83   |     |
| 239536_at                   | AF1Q               | Myeloid/lymphoid or mixed-lineage leukemia                                                 | 3.73  |     | 2.83  |     | 3.03   |     |
| 205099_s_at                 | CCR1               | chemokine (C-C motif) receptor 1                                                           | 3.73  |     | 4.92  |     | -3.25  | D   |
| 227609_at                   | EPST11             | epithelial stromal interaction 1 (breast)                                                  | 3.73  |     | 4.59  |     | 2.46   |     |
| 242422_at                   | G3BP               | Ras-GTPase-activating protein SH3-domain-binding protein                                   | 3.73  |     | 3.25  |     | 2.83   |     |
| 217502_at                   | IFIT2              | interferon-induced protein with tetratricopeptide repeats 2                                | 3.73  |     | 9.19  |     | 2.64   |     |
| 222860_s_at                 | PDGFD              | platelet derived growth factor D                                                           | 3.73  |     | 3.03  |     | 4.59   |     |
| 208447_s_at                 | PRPS1              | phosphoribosyl pyrophosphate synthetase 1                                                  | 3.73  |     | 2.64  |     | 2.00   |     |
| 1553177_at                  | SH2D1B             | SH2 domain containing 1B                                                                   | 3.73  |     | 2.00  |     | 6.50   |     |
| 223340_at                   | SPG3A              | spastic paraplegia 3A (autosomal dominant)                                                 | 3.73  |     | 3.73  |     | 6.06   |     |
| 229067_at                   | ---                | Similar to Formin binding protein 2 (srGAP2)                                               | 3.48  |     | 4.29  |     | 3.73   |     |
| 1555419_a_at                | ASAH1              | N-acylsphingosine amidohydrolase (acid ceramidase) 1                                       | 3.48  |     | 4.92  |     | 2.46   |     |
| 208653_s_at                 | CD164              | CD164 antigen, sialomucin                                                                  | 3.48  |     | 3.03  |     | 2.14   |     |
| 205686_s_at                 | CD86 (CD28 ligand) | CD86 molecule                                                                              | 3.48  |     | 8.57  |     | A      | NC  |
| 229746_x_at                 | CEBPZ              | CCAAT/enhancer binding protein zeta                                                        | 3.48  |     | 3.25  |     | 4.59   |     |
| 209524_at                   | HDGFRP3            | hepatoma-derived growth factor, related protein 3                                          | 3.48  |     | 3.48  |     | 6.50   |     |
| 221581_s_at                 | LAT2               | linker for activation of T cells family, member 2                                          | 3.48  |     | 3.25  |     | 3.48   |     |
| 209199_s_at                 | MEF2C              | MADS box transcription enhancer factor 2, polypeptide C                                    | 3.48  |     | 4.59  |     | 3.48   |     |
| 208983_s_at                 | PECAM1             | platelet/endothelial cell adhesion molecule (CD31 antigen)                                 | 3.48  |     | 3.03  |     | 3.03   |     |
| 225738_at                   | RAPGEF1            | Rap guanine nucleotide exchange factor (GEF) 1                                             | 3.48  |     | 3.25  |     | 2.46   |     |
| 202129_s_at                 | RIOK3              | RIO kinase 3 (yeast) /// RIO kinase 3 (yeast)                                              | 3.48  |     | 5.28  |     | 2.00   |     |
| 224836_at                   | TP53INP2           | tumor protein p53 inducible nuclear protein 2                                              | 3.48  |     | 5.28  |     | 3.48   |     |
| 231152_at                   | ---                | MRNA; cDNA DKFZp686D22106 (from clone DKFZp686D22106)                                      | 3.25  |     | 6.96  |     | 4.92   |     |
| 1556545_at                  | ---                | CDNA FLJ32379 fis, clone SKMUS1000030                                                      | 3.25  |     | 7.46  |     | 4.29   |     |
| 208002_s_at                 | ACOT7              | acyl-CoA thioesterase 7                                                                    | 3.25  |     | 3.25  |     | 2.64   |     |
| 206513_at                   | AIM2               | absent in melanoma 2                                                                       | 3.25  |     | 2.14  |     | 2.30   |     |
| 211022_s_at                 | ATRX               | alpha thalassemia/mental retardation syndrome X-linked (RAD54 homolog)                     | 3.25  |     | 3.03  |     | 3.03   |     |
| 229733_s_at                 | CBX6               | Chromobox homolog 6                                                                        | 3.25  |     | 4.00  |     | 2.30   |     |
| 217208_s_at                 | DLG1               | discs, large homolog 1 (Drosophila)                                                        | 3.25  |     | 3.48  |     | 2.14   |     |
| 208092_s_at                 | FAM49A             | family with sequence similarity 49, member A                                               | 3.25  |     | 3.25  |     | 2.83   |     |
| 204562_at                   | IRF4               | interferon regulatory factor 4                                                             | 3.25  |     | 1.74  |     | 2.83   |     |
| 210184_at                   | ITGAX              | integrin, alpha X (antigen CD11C (p150), alpha polypeptide)                                | 3.25  |     | 6.50  |     | 4.29   |     |
| 201464_x_at                 | JUN                | v-jun sarcoma virus 17 oncogene homolog (avian)                                            | 3.25  |     | 8.57  |     | 2.64   |     |
| 223584_s_at                 | KBTBD2             | kelch repeat and BTB (POZ) domain containing 2                                             | 3.25  |     | 4.00  |     | 2.46   |     |
| 1558937_s_at                | LOC153561          | Hypothetical protein LOC153561                                                             | 3.25  |     | 5.28  |     | 3.48   |     |
| 209200_at                   | MEF2C              | MADS box transcription enhancer factor 2, polypeptide C                                    | 3.25  |     | 3.25  |     | 4.00   |     |
| 237158_s_at                 | MPHOSPH9           | M-phase phosphoprotein 9                                                                   | 3.25  |     | 2.64  |     | 2.14   |     |
| 203574_at                   | NFIL3              | nuclear factor, interleukin 3 regulated                                                    | 3.25  |     | 4.92  |     | 5.28   |     |

| AFFYMETRIX PROBE SET ID | GENE SYMBOL     | GENE TITLE                                                                     | FC#22 | I/D | FC#2 | I/D | FC#26 | I/D |
|-------------------------|-----------------|--------------------------------------------------------------------------------|-------|-----|------|-----|-------|-----|
| 227204_at               | PARD6G          | par-6 partitioning defective 6 homolog gamma (C. elegans)                      | 3.25  |     | 2.64 |     | 3.48  |     |
| 226279_at               | PRSS23          | protease, serine, 23                                                           | 3.25  |     | 2.30 |     | 4.00  |     |
| 216899_s_at             | SCAP2           | src family associated phosphoprotein 2                                         | 3.25  |     | 3.48 |     | 3.25  |     |
| 212811_x_at             | SLC1A4          | Solute carrier family 1, member 4                                              | 3.25  |     | 2.00 |     | 6.96  |     |
| 201167_x_at             | ARHGDI4         | Rho GDP dissociation inhibitor (GDI) alpha                                     | 3.03  |     | 3.03 |     | 2.46  |     |
| 206133_at               | BIRC4BP         | XIAP associated factor-1                                                       | 3.03  |     | 2.46 |     | 3.25  |     |
| 221222_s_at             | C1orf56         | chromosome 1 open reading frame 56                                             | 3.03  |     | 2.83 |     | 2.83  |     |
| 200935_at               | CALR            | calreticulin                                                                   | 3.03  |     | 4.59 |     | 3.03  |     |
| 207319_s_at             | CDC2L5          | cell division cycle 2-like 5 (cholinesterase-related cell division controller) | 3.03  |     | 2.46 |     | 2.00  |     |
| 200764_s_at             | CTNNA1          | catenin (cadherin-associated protein), alpha 1, 102kDa                         | 3.03  |     | 3.03 |     | 2.64  |     |
| 221417_x_at             | EDG8            | endothelial differentiation, sphingolipid G-protein-coupled receptor, 8        | 3.03  |     | 2.00 |     | 2.46  |     |
| 46947_at                | GNL3L           | Guanine nucleotide binding protein-like 3 (nucleolar)-like                     | 3.03  |     | 3.48 |     | 2.46  |     |
| 202438_x_at             | IDS             | iduronate 2-sulfatase (Hunter syndrome)                                        | 3.03  |     | 2.30 |     | 3.25  |     |
| 218295_s_at             | NUP50           | nucleoporin 50kDa                                                              | 3.03  |     | 2.64 |     | 2.14  |     |
| 201835_s_at             | PRKAB1          | protein kinase, AMP-activated, beta 1 non-catalytic subunit                    | 3.03  |     | 2.14 |     | 2.30  |     |
| 226389_s_at             | RAPGEF1         | Rap guanine nucleotide exchange factor (GEF) 1                                 | 3.03  |     | 2.30 |     | 3.73  |     |
| 222660_s_at             | RNF38           | ring finger protein 38                                                         | 3.03  |     | 3.73 |     | 2.00  |     |
| 219892_at               | TM6SF1          | transmembrane 6 superfamily member 1                                           | 3.03  |     | 4.92 |     | 3.48  |     |
| 226825_s_at             | TPARL           | TPA regulated locus                                                            | 3.03  |     | 3.48 |     | 4.59  |     |
| 1555978_s_at            | ---             | LOC440476                                                                      | 2.83  |     | 3.73 |     | 2.00  |     |
| 229309_at               | ADRB1           | Adrenergic, beta-1-, receptor                                                  | 2.83  |     | 4.92 |     | 13.93 |     |
| 213872_at               | C6orf62         | Chromosome 6 open reading frame 62                                             | 2.83  |     | 2.83 |     | 3.48  |     |
| 1555827_at              | CCNL1           | Cyclin L1                                                                      | 2.83  |     | 5.28 |     | 4.00  |     |
| 210844_x_at             | CTNNA1          | catenin (cadherin-associated protein), alpha 1, 102kDa                         | 2.83  |     | 2.64 |     | 3.03  |     |
| 202416_at               | DNAJC7          | DnaJ (Hsp40) homolog, subfamily C, member 7                                    | 2.83  |     | 3.48 |     | 2.14  |     |
| 225834_at               | FAM72A          | family with sequence similarity 72, member A                                   | 2.83  |     | 3.48 |     | 3.25  |     |
| 204747_at               | IFIT3           | interferon-induced protein with tetratricopeptide repeats 3                    | 2.83  |     | 2.64 |     | 4.00  |     |
| 209653_at               | KPNA4           | karyopherin alpha 4 (importin alpha 3)                                         | 2.83  |     | 3.03 |     | 2.00  |     |
| 221695_s_at             | MAP3K2          | mitogen-activated protein kinase kinase kinase 2                               | 2.83  |     | 3.73 |     | 2.46  |     |
| 233072_at               | NTNG2           | netrin G2                                                                      | 2.83  |     | 3.73 |     | 3.48  |     |
| 243296_at               | PBEF1           | Pre-B-cell colony enhancing factor 1                                           | 2.83  |     | 8.57 |     | 4.59  |     |
| 202458_at               | PRSS23          | protease, serine, 23                                                           | 2.83  |     | 2.14 |     | 3.48  |     |
| 202085_at               | TJP2            | tight junction protein 2 (zona occludens 2)                                    | 2.83  |     | 2.46 |     | 4.92  |     |
| 242776_at               | ZCCHC6          | zinc finger, CCHC domain containing 6                                          | 2.83  |     | 2.64 |     | 2.83  |     |
| 201971_s_at             | ATP6V1A         | ATPase, H+ transporting, lysosomal 70kDa, V1 subunit A                         | 2.64  |     | 3.73 |     | 2.00  |     |
| 204908_s_at             | BCL3            | B-cell CLL/lymphoma 3                                                          | 2.64  |     | 4.59 |     | 4.00  |     |
| 200765_x_at             | CTNNA1          | catenin (cadherin-associated protein), alpha 1, 102kDa                         | 2.64  |     | 2.64 |     | 3.48  |     |
| 243388_at               | DKFZP564O0463   | WD repeats and SOF1 domain containing                                          | 2.64  |     | 3.03 |     | 3.48  |     |
| 224642_at               | FYTTD1          | forty-two-three domain containing 1                                            | 2.64  |     | 2.00 |     | 2.14  |     |
| 225116_at               | HIPK2           | Homeodomain interacting protein kinase 2                                       | 2.64  |     | 2.30 |     | 4.59  |     |
| 215779_s_at             | HIST1H2BG       | histone 1, H2bg                                                                | 2.64  |     | 2.83 |     | 5.66  |     |
| 228196_s_at             | KIAA0217        | La ribonucleoprotein domain family, member 5                                   | 2.64  |     | 2.30 |     | 2.46  |     |
| 231874_at               | MGC39518        | hypothetical protein MGC39518                                                  | 2.64  |     | 2.14 |     | 4.29  |     |
| 210756_s_at             | NOTCH2          | Notch homolog 2 (Drosophila) /// Notch homolog 2 (Drosophila)                  | 2.64  |     | 3.73 |     | 2.46  |     |
| 204589_at               | NUAK1           | NUAK family, SNF1-like kinase, 1                                               | 2.64  |     | 2.00 |     | 2.14  |     |
| 236495_at               | PBEF1           | Pre-B-cell colony enhancing factor 1                                           | 2.64  |     | 9.19 |     | 3.73  |     |
| 214487_s_at             | RAP2A /// RAP2B | RAP2A, member of RAS oncogene family /// RAP2B, member of RAS oncogene family  | 2.64  |     | 2.30 |     | 3.48  |     |
| 228996_at               | RC3H1           | ring finger and CCCH-type zinc finger domains 1                                | 2.64  |     | 4.29 |     | 4.92  |     |
| 209545_s_at             | RIPK2           | receptor-interacting serine-threonine kinase 2                                 | 2.64  |     | 4.29 |     | 3.25  |     |
| 204361_s_at             | SCAP2           | src family associated phosphoprotein 2                                         | 2.64  |     | 2.83 |     | 2.64  |     |
| 235069_at               | TATDN3          | TatD DNase domain containing 3                                                 | 2.64  |     | 2.83 |     | 2.64  |     |
| 219679_s_at             | WAC             | WW domain containing adaptor with coiled-coil                                  | 2.64  |     | 2.30 |     | 2.30  |     |
| 242020_s_at             | ZBP1            | Z-DNA binding protein 1                                                        | 2.64  |     | 3.03 |     | 2.00  |     |
| 200868_s_at             | ZNF313          | zinc finger protein 313                                                        | 2.64  |     | 3.25 |     | 2.00  |     |
| 209774_x_at             | CXCL2           | chemokine (C-X-C motif) ligand 2                                               | 2.54  |     | 9.19 |     | A     | NC  |
| 228642_at               | ---             | Homo sapiens, clone IMAGE:5019307, mRNA                                        | 2.46  |     | 2.46 |     | 2.30  |     |
| 227745_at               | ---             | CDNA FLJ90571 fis, highly similar to Homo sapiens patched related protein TRC8 | 2.46  |     | 4.92 |     | 4.92  |     |
| 227260_at               | ANKRD10         | Ankyrin repeat domain 10                                                       | 2.46  |     | 4.92 |     | 2.83  |     |
| 222458_s_at             | C1orf108        | chromosome 1 open reading frame 108                                            | 2.46  |     | 3.48 |     | 2.14  |     |
| 1553338_at              | C1orf55         | chromosome 1 open reading frame 55                                             | 2.46  |     | 3.25 |     | 2.14  |     |
| 205692_s_at             | CD38            | CD38 antigen (p45)                                                             | 2.46  |     | 2.83 |     | 5.66  |     |
| 223585_x_at             | KBTBD2          | kelch repeat and BTB (POZ) domain containing 2                                 | 2.46  |     | 2.00 |     | 2.46  |     |

| AFFYMETRIX PROBE SET ID | GENE SYMBOL | GENE TITLE                                                                                     | FC#22 | I/D | FC#2  | I/D | FC#26  | I/D |
|-------------------------|-------------|------------------------------------------------------------------------------------------------|-------|-----|-------|-----|--------|-----|
| 229676_at               | PAPD1       | PAP associated domain containing 1                                                             | 2.46  |     | 2.83  |     | 2.30   |     |
| 1554089_s_at            | SBDS        | Shwachman-Bodian-Diamond syndrome                                                              | 2.46  |     | 3.03  |     | 3.25   |     |
| 243797_at               | STK17B      | serine/threonine kinase 17b (apoptosis-inducing)                                               | 2.46  |     | 4.00  |     | 2.00   |     |
| 217741_s_at             | ZA20D2      | zinc finger, A20 domain containing 2                                                           | 2.46  |     | 5.28  |     | 2.14   |     |
| 242433_at               | ZBTB11      | Zinc finger and BTB domain containing 11                                                       | 2.46  |     | 7.46  |     | 3.25   |     |
| 242836_at               | ATP1B3      | ATPase, Na+/K+ transporting, beta 3 polypeptide                                                | 2.30  |     | 8.00  |     | 6.96   |     |
| 227699_at               | C14orf149   | chromosome 14 open reading frame 149                                                           | 2.30  |     | 3.25  |     | 3.73   |     |
| 211367_s_at             | CASP1       | caspace 1, apoptosis-related cysteine peptidase                                                | 2.30  |     | 2.30  |     | 2.30   |     |
| 236191_at               | CD38        | CD38 antigen (p45)                                                                             | 2.30  |     | 6.06  |     | 9.19   |     |
| 200862_at               | DHCR24      | 24-dehydrocholesterol reductase                                                                | 2.30  |     | 2.14  |     | 2.64   |     |
| 202430_s_at             | PLSCR1      | phospholipid scramblase 1                                                                      | 2.30  |     | 3.25  |     | 2.00   |     |
| 209051_s_at             | RALGDS      | ral guanine nucleotide dissociation stimulator                                                 | 2.30  |     | 2.64  |     | 2.46   |     |
| 221430_s_at             | RNF146      | ring finger protein 146 /// ring finger protein 146                                            | 2.30  |     | 2.00  |     | 2.64   |     |
| 201311_s_at             | SH3BGR1     | SH3 domain binding glutamic acid-rich protein like                                             | 2.30  |     | 2.64  |     | 2.30   |     |
| 1552656_s_at            | UHMK1       | U2AF homology motif (UHM) kinase 1                                                             | 2.30  |     | 3.25  |     | 2.46   |     |
| 1559227_s_at            | VHL         | von Hippel-Lindau tumor suppressor                                                             | 2.30  |     | 3.73  |     | 2.30   |     |
| 220494_s_at             | ---         | ---                                                                                            | 2.14  |     | 2.00  |     | 2.30   |     |
| 1556676_a_at            | ---         | CDNA clone IMAGE:4793171                                                                       | 2.14  |     | 2.64  |     | 3.03   |     |
| 225557_at               | AXUD1       | AXIN1 up-regulated 1                                                                           | 2.14  |     | 4.92  |     | 3.25   |     |
| 241740_at               | CREM        | CAMP responsive element modulator                                                              | 2.14  |     | 4.59  |     | 2.30   |     |
| 232617_at               | CTSS        | cathepsin S                                                                                    | 2.14  |     | 3.48  |     | 2.00   |     |
| 212975_at               | DENND3      | DENN/MADD domain containing 3                                                                  | 2.14  |     | 2.64  |     | 2.14   |     |
| 209304_x_at             | GADD45B     | growth arrest and DNA-damage-inducible, beta                                                   | 2.14  |     | 3.73  |     | 2.14   |     |
| 231918_s_at             | GFM2        | G elongation factor, mitochondrial 2                                                           | 2.14  |     | 2.00  |     | 2.83   |     |
| 226160_at               | H6PD        | hexose-6-phosphate dehydrogenase (glucose 1-dehydrogenase)                                     | 2.14  |     | 3.03  |     | 2.46   |     |
| 235458_at               | HAVCR2      | hepatitis A virus cellular receptor 2                                                          | 2.14  |     | 2.14  |     | 4.59   |     |
| 200798_x_at             | MCL1        | myeloid cell leukemia sequence 1 (BCL2-related)                                                | 2.14  |     | 2.46  |     | 2.00   |     |
| 209519_at               | NCBP1       | nuclear cap binding protein subunit 1, 80kDa                                                   | 2.14  |     | 2.30  |     | 3.73   |     |
| 1559052_s_at            | PAK2        | p21 (CDKN1A)-activated kinase 2                                                                | 2.14  |     | 2.30  |     | 2.83   |     |
| 208982_at               | PECAM1      | Platelet/endothelial cell adhesion molecule (CD31 antigen)                                     | 2.14  |     | 2.14  |     | 3.03   |     |
| 232392_at               | SFRS3       | Splicing factor, arginine/serine-rich 3                                                        | 2.14  |     | 2.64  |     | 2.64   |     |
| 1564962_at              | ZNF92       | zinc finger protein 92 (HTF12)                                                                 | 2.14  |     | 4.00  |     | 3.73   |     |
| 242691_at               | ---         | CDNA FLJ41369 fis, clone BRCAN2006117                                                          | 2.00  |     | 3.73  |     | 5.28   |     |
| 230580_at               | ---         | CDNA clone IMAGE:5312086                                                                       | 2.00  |     | 2.30  |     | 2.64   |     |
| 205010_at               | GNL3L       | guanine nucleotide binding protein-like 3 (nucleolar)-like                                     | 2.00  |     | 2.30  |     | 2.64   |     |
| 202625_at               | LYN         | v-yes-1 Yamaguchi sarcoma viral related oncogene homolog                                       | 2.00  |     | 3.25  |     | 2.30   |     |
| 202446_s_at             | PLSCR1      | phospholipid scramblase 1                                                                      | 2.00  |     | 3.25  |     | 2.30   |     |
| 226436_at               | RASSF4      | Ras association (RalGDS/AF-6) domain family 4                                                  | 2.00  |     | 2.64  |     | 3.48   |     |
| 1559582_at              | RHOQ        | ras homolog gene family, member Q                                                              | 2.00  |     | 5.66  |     | 2.64   |     |
| 226272_at               | ---         | Full length insert cDNA clone ZD79H10                                                          | -2.00 | D   | -3.25 | D   | -6.96  | D   |
| 1556821_x_at            | ---         | Full length insert cDNA YR33G07                                                                | -2.00 | D   | -5.66 | D   | -2.64  | D   |
| 232038_at               | C6orf170    | chromosome 6 open reading frame 170                                                            | -2.00 | D   | -2.30 | D   | -2.14  | D   |
| 212400_at               | C9orf132    | chromosome 9 open reading frame 132                                                            | -2.00 | D   | -2.83 | D   | -3.48  | D   |
| 209933_s_at             | CD300A      | CD300A antigen                                                                                 | -2.00 | D   | -2.00 | D   | -68.59 | D   |
| 205213_at               | CENTB1      | centaurin, beta 1                                                                              | -2.00 | D   | -2.83 | D   | -4.59  | D   |
| 213317_at               | CLIC5       | Chloride intracellular channel 5                                                               | -2.00 | D   | -2.00 | D   | -3.73  | D   |
| 203385_at               | DGKA        | diacylglycerol kinase, alpha 80kDa                                                             | -2.00 | D   | -2.64 | D   | -2.30  | D   |
| 205419_at               | EBI2        | Epstein-Barr virus induced gene 2 (lymphocyte-specific G protein-coupled receptor)             | -2.00 | D   | -3.25 | D   | -11.31 | D   |
| 201769_at               | ENTH        | enthoprotin                                                                                    | -2.00 | D   | -2.14 | D   | -2.30  | D   |
| 231832_at               | GALNT4      | UDP-N-acetyl-alpha-D-galactosamine:polypeptide N-acetylgalactosaminyltransferase 4 (GalNAc-T4) | -2.00 | D   | -2.00 | D   | -2.46  | D   |
| 235306_at               | GIMAP8      | GTPase, IMAP family member 8                                                                   | -2.00 | D   | -3.73 | D   | -2.00  | D   |
| 214677_x_at             | IGL@        | immunoglobulin lambda locus /// immunoglobulin lambda constant 1                               | -2.00 | D   | -4.92 | D   | -5.66  | D   |
| 227686_at               | MGC15763    | hypothetical protein BC008322                                                                  | -2.00 | D   | -2.64 | D   | -5.28  | D   |
| 242770_at               | MGC72104    | Chromosome 20 open reading frame 80                                                            | -2.00 | D   | -2.00 | D   | -3.03  | D   |
| 214771_x_at             | M-RIP       | myosin phosphatase-Rho interacting protein                                                     | -2.00 | D   | -2.00 | D   | -2.00  | D   |
| 204951_at               | RHOH        | ras homolog gene family, member H                                                              | -2.00 | D   | -6.06 | D   | -2.00  | D   |
| 230058_at               | SDCCAG3     | serologically defined colon cancer antigen 3                                                   | -2.00 | D   | -2.00 | D   | -2.46  | D   |
| 219765_at               | ZNF329      | zinc finger protein 329                                                                        | -2.00 | D   | -3.25 | D   | -2.14  | D   |
| 229765_at               | ---         | Transcribed locus                                                                              | -2.14 | D   | -2.30 | D   | -2.00  | D   |
| 212413_at               | SEPT6       | septin 6                                                                                       | -2.14 | D   | -2.46 | D   | -4.29  | D   |
| 239679_at               | ACTR6       | ARP6 actin-related protein 6 homolog (yeast)                                                   | -2.14 | D   | -3.73 | D   | -2.14  | D   |
| AFFYMETRIX PROBE SET ID | GENE SYMBOL | GENE TITLE                                                                                     | FC#22 | I/D | FC#2  | I/D | FC#26  | I/D |

|                                |                    |                                                                                                   |              |            |             |            |              |            |
|--------------------------------|--------------------|---------------------------------------------------------------------------------------------------|--------------|------------|-------------|------------|--------------|------------|
| 203865_s_at                    | ADARB1             | adenosine deaminase, RNA-specific, B1 (RED1 homolog rat)                                          | -2.14        | D          | -2.64       | D          | -2.83        | D          |
| 212930_at                      | ATP2B1             | ATPase, Ca++ transporting, plasma membrane 1                                                      | -2.14        | D          | -2.14       | D          | -3.48        | D          |
| 220059_at                      | BRDG1              | BCR downstream signaling 1                                                                        | -2.14        | D          | -4.92       | D          | -2.14        | D          |
| 205831_at                      | CD2                | CD2 antigen (p50), sheep red blood cell receptor                                                  | -2.14        | D          | -3.48       | D          | -3.03        | D          |
| 205212_s_at                    | CENTB1             | centaurin, beta 1                                                                                 | -2.14        | D          | -2.46       | D          | -2.64        | D          |
| 236649_at                      | DTWD1              | DTW domain containing 1                                                                           | -2.14        | D          | -3.25       | D          | -2.30        | D          |
| 236816_at                      | FLJ13089           | hypothetical protein FLJ13089                                                                     | -2.14        | D          | -2.00       | D          | -2.00        | D          |
| 233085_s_at                    | FLJ22833           | hypothetical protein FLJ22833                                                                     | -2.14        | D          | -2.14       | D          | -2.46        | D          |
| 222872_x_at                    | FLJ22833           | hypothetical protein FLJ22833                                                                     | -2.14        | D          | -2.14       | D          | -2.64        | D          |
| 1552315_at                     | GIMAP1             | GTPase, IMAP family member 1                                                                      | -2.14        | D          | -3.03       | D          | -2.00        | D          |
| 209255_at                      | KIAA0265           | KIAA0265 protein                                                                                  | -2.14        | D          | -2.46       | D          | -2.64        | D          |
| 212675_s_at                    | KIAA0582           | KIAA0582                                                                                          | -2.14        | D          | -2.14       | D          | -3.03        | D          |
| 222603_at                      | KIAA1815           | KIAA1815                                                                                          | -2.14        | D          | -2.83       | D          | -2.14        | D          |
| 1564776_at                     | LENG10             | leukocyte receptor cluster (LRC) member 10                                                        | -2.14        | D          | -5.28       | D          | -5.66        | D          |
| 212913_at                      | MSH5               | mutS homolog 5 (E. coli)                                                                          | -2.14        | D          | -2.30       | D          | -4.59        | D          |
| 212594_at                      | PDCD4              | programmed cell death 4 (neoplastic transformation inhibitor)                                     | -2.14        | D          | -2.64       | D          | -2.46        | D          |
| 220954_s_at                    | PILRB              | paired immunoglobulin-like type 2 receptor beta                                                   | -2.14        | D          | -2.30       | D          | -3.03        | D          |
| 209884_s_at                    | SLC4A7             | solute carrier family 4, sodium bicarbonate cotransporter, member 7                               | -2.14        | D          | -4.00       | D          | -2.30        | D          |
| 201320_at                      | SMARCC2            | SWI/SNF related, matrix associated, actin dependent regulator of chromatin, subfamily c, member 2 | -2.14        | D          | -2.14       | D          | -2.00        | D          |
| 229723_at                      | TAGAP              | T-cell activation GTPase activating protein                                                       | -2.14        | D          | -4.92       | D          | -2.14        | D          |
| 214785_at                      | VPS13A             | vacuolar protein sorting 13A (yeast)                                                              | -2.14        | D          | -2.00       | D          | -2.46        | D          |
| 214823_at                      | ZNF204             | zinc finger protein 204                                                                           | -2.14        | D          | -13.00      | D          | -10.56       | D          |
| 242289_at                      | ---                | ---                                                                                               | -2.30        | D          | -7.46       | D          | -2.46        | D          |
| 236198_at                      | ---                | Transcribed locus                                                                                 | -2.30        | D          | -3.03       | D          | -4.29        | D          |
| 228049_x_at                    | ---                | Transcribed locus                                                                                 | -2.30        | D          | -2.14       | D          | -3.73        | D          |
| 212414_s_at                    | SEPT6              | septin 6 /// cytokine-like nuclear factor n-pac                                                   | -2.30        | D          | -2.64       | D          | -3.73        | D          |
| 212543_at                      | AIM1               | absent in melanoma 1                                                                              | -2.30        | D          | -2.46       | D          | -2.83        | D          |
| 206385_s_at                    | ANK3               | ankyrin 3, node of Ranvier (ankyrin G)                                                            | -2.30        | D          | -3.73       | D          | -3.73        | D          |
| 1569607_s_at                   | ANKRD20A1          | ankyrin repeat domain 20 family, member A1                                                        | -2.30        | D          | -5.28       | D          | -6.50        | D          |
| 209829_at                      | C6orf32            | chromosome 6 open reading frame 32                                                                | -2.30        | D          | -3.73       | D          | -2.64        | D          |
| 205467_at                      | CASP10             | caspase 10, apoptosis-related cysteine peptidase                                                  | -2.30        | D          | -2.83       | D          | -3.03        | D          |
| 244599_at                      | CERKL              | Ceramide kinase-like                                                                              | -2.30        | D          | -2.14       | D          | -4.59        | D          |
| 216060_s_at                    | DAAM1              | dishevelled associated activator of morphogenesis 1                                               | -2.30        | D          | -2.83       | D          | -2.30        | D          |
| 230180_at                      | DDX17              | DEAD (Asp-Glu-Ala-Asp) box polypeptide 17                                                         | -2.30        | D          | -2.14       | D          | -2.30        | D          |
| 203693_s_at                    | E2F3               | E2F transcription factor 3                                                                        | -2.30        | D          | -2.64       | D          | -4.92        | D          |
| 1554067_at                     | FLJ32549           | hypothetical protein FLJ32549                                                                     | -2.30        | D          | -2.00       | D          | -3.73        | D          |
| 1552316_a_at                   | GIMAP1             | GTPase, IMAP family member 1                                                                      | -2.30        | D          | -3.25       | D          | -2.30        | D          |
| 236862_at                      | GOPC               | Golgi associated PDZ and coiled-coil motif containing                                             | -2.30        | D          | -2.30       | D          | -2.00        | D          |
| 213170_at                      | GPX7               | glutathione peroxidase 7                                                                          | -2.30        | D          | -2.46       | D          | -9.85        | D          |
| 241036_at                      | HPS3               | Hermansky-Pudlak syndrome 3                                                                       | -2.30        | D          | -3.25       | D          | -2.14        | D          |
| 1556061_at                     | LOC283012          | hypothetical protein LOC283012                                                                    | -2.30        | D          | -2.64       | D          | -2.00        | D          |
| 230245_s_at                    | LOC283663          | hypothetical protein LOC283663                                                                    | -2.30        | D          | -4.92       | D          | -4.29        | D          |
| 213908_at                      | LOC339005          | hypothetical protein LOC339005                                                                    | -2.30        | D          | -2.30       | D          | -21.11       | D          |
| 235469_at                      | MGC40405           | hypothetical protein MGC40405 /// similar to RIKEN cDNA 5830415L20                                | -2.30        | D          | -2.46       | D          | -2.64        | D          |
| 226876_at                      | MGC45871           | hypothetical protein MGC45871                                                                     | -2.30        | D          | -2.14       | D          | -8.57        | D          |
| 242239_at                      | NSUN6              | NOL1/NOP2/Sun domain family, member 6                                                             | -2.30        | D          | -2.30       | D          | -2.30        | D          |
| 210448_s_at                    | P2RX5              | purinergic receptor P2X, ligand-gated ion channel, 5                                              | -2.30        | D          | -4.59       | D          | -4.29        | D          |
| 216945_x_at                    | PASK               | PAS domain containing serine/threonine kinase                                                     | -2.30        | D          | -2.14       | D          | -2.46        | D          |
| 225295_at                      | SLC39A10           | solute carrier family 39 (zinc transporter), member 10                                            | -2.30        | D          | -2.14       | D          | -2.14        | D          |
| 229253_at                      | THEM4              | thioesterase superfamily member 4                                                                 | -2.30        | D          | -3.25       | D          | -4.92        | D          |
| 238468_at                      | TNRC6B             | trinucleotide repeat containing 6B                                                                | -2.30        | D          | -2.83       | D          | -2.30        | D          |
| 215796_at                      | TRAV20             | T cell receptor alpha variable 20                                                                 | -2.30        | D          | -3.25       | D          | -16.00       | D          |
| 1559949_at                     | TRPS1              | Trichorhinophalangeal syndrome I                                                                  | -2.30        | D          | -2.30       | D          | -2.83        | D          |
| 236401_at                      | ---                | Full-length cDNA clone CS0DI016YI23                                                               | -2.46        | D          | -3.73       | D          | -2.30        | D          |
| 242498_x_at                    | ARL6IP6            | ADP-ribosylation-like factor 6 interacting protein 6                                              | -2.46        | D          | -2.64       | D          | -2.30        | D          |
| 241871_at                      | CAMK4              | calcium/calmodulin-dependent protein kinase IV                                                    | -2.46        | D          | -5.66       | D          | -21.11       | D          |
| 227900_at                      | CBLB               | Cas-Br-M (murine) ecotropic retroviral transforming sequence b                                    | -2.46        | D          | -2.46       | D          | -2.14        | D          |
| 206545_at                      | CD28               | CD28 antigen (Tp44)                                                                               | -2.46        | D          | -8.57       | D          | -256.00      | D          |
| 232063_x_at                    | FARSLB             | phenylalanine-tRNA synthetase-like, beta subunit                                                  | -2.46        | D          | -2.30       | D          | -2.30        | D          |
| 208054_at                      | HERC4              | hect domain and RLD 4                                                                             | -2.46        | D          | -2.14       | D          | -8.00        | D          |
| 209374_s_at                    | IGHM               | immunoglobulin heavy constant mu                                                                  | -2.46        | D          | -3.73       | D          | -3.73        | D          |
| 212592_at                      | IGJ                | Immunoglobulin J polypeptide, linker protein for immunoglobulin alpha and mu polypeptides         | -2.46        | D          | -5.66       | D          | -7.46        | D          |
| <b>AFFYMETRIX PROBE SET ID</b> | <b>GENE SYMBOL</b> | <b>GENE TITLE</b>                                                                                 | <b>FC#22</b> | <b>I/D</b> | <b>FC#2</b> | <b>I/D</b> | <b>FC#26</b> | <b>I/D</b> |

|                                |                    |                                                                         |              |            |             |            |              |            |
|--------------------------------|--------------------|-------------------------------------------------------------------------|--------------|------------|-------------|------------|--------------|------------|
| 237733_at                      | KIAA0564           | KIAA0564 protein                                                        | -2.46        | D          | -9.85       | D          | -2.14        | D          |
| 53968_at                       | KIAA1698           | KIAA1698 protein                                                        | -2.46        | D          | -3.03       | D          | -2.00        | D          |
| 212944_at                      | MRPS6              | Mitochondrial ribosomal protein S6                                      | -2.46        | D          | -4.00       | D          | -3.03        | D          |
| 214177_s_at                    | PBXIP1             | pre-B-cell leukemia transcription factor interacting protein 1          | -2.46        | D          | -3.25       | D          | -2.00        | D          |
| 225321_s_at                    | PILRB              | paired immunoglobulin-like type 2 receptor beta                         | -2.46        | D          | -2.83       | D          | -2.30        | D          |
| 211748_x_at                    | PTGDS              | prostaglandin D2 synthase 21kDa (brain)                                 | -2.46        | D          | -2.14       | D          | -5.28        | D          |
| 232963_at                      | RFWD2              | Ring finger and WD repeat domain 2                                      | -2.46        | D          | -2.14       | D          | -2.00        | D          |
| 206181_at                      | SLAMF1             | signaling lymphocytic activation molecule family member 1               | -2.46        | D          | -2.46       | D          | -8.00        | D          |
| 219156_at                      | SYNJ2BP            | synaptojanin 2 binding protein                                          | -2.46        | D          | -2.14       | D          | -2.46        | D          |
| 235735_at                      | TNFSF8             | Tumor necrosis factor (ligand) superfamily, member 8                    | -2.46        | D          | -2.30       | D          | -6.96        | D          |
| 237208_at                      | WDR61              | WD repeat domain 61                                                     | -2.46        | D          | -3.48       | D          | -2.83        | D          |
| 236583_at                      | ---                | Transcribed locus                                                       | -2.64        | D          | -4.92       | D          | -3.25        | D          |
| 233219_at                      | ---                | ---                                                                     | -2.64        | D          | -3.25       | D          | -2.14        | D          |
| 231247_s_at                    | ---                | LOC440667                                                               | -2.64        | D          | -3.73       | D          | -3.73        | D          |
| 1557733_a_at                   | ---                | MRNA; cDNA DKFZp667K2218                                                | -2.64        | D          | -4.00       | D          | -9.19        | D          |
| 216563_at                      | ANKRD12            | Ankyrin repeat domain 12                                                | -2.64        | D          | -4.59       | D          | -6.50        | D          |
| 238549_at                      | CBFA2T2            | core-binding factor, runt domain, alpha subunit 2; translocated to, 2   | -2.64        | D          | -2.64       | D          | -2.00        | D          |
| 238480_at                      | CHR18 ORF50        | Chromosome 18 open reading frame 50                                     | -2.64        | D          | -2.83       | D          | -4.00        | D          |
| 201278_at                      | DAB2               | Disabled homolog 2, mitogen-responsive phosphoprotein (Drosophila)      | -2.64        | D          | -2.30       | D          | -68.59       | D          |
| 64064_at                       | GIMAP5             | GTPase, IMAP family member 5                                            | -2.64        | D          | -4.59       | D          | -2.14        | D          |
| 210425_x_at                    | GOLGA8B            | golgi autoantigen, golgin subfamily a, 8B                               | -2.64        | D          | -2.46       | D          | -3.03        | D          |
| 225386_s_at                    | HNRPLL             | heterogeneous nuclear ribonucleoprotein L-like                          | -2.64        | D          | -2.30       | D          | -2.30        | D          |
| 221790_s_at                    | LDLRAP1            | low density lipoprotein receptor adaptor protein 1                      | -2.64        | D          | -3.25       | D          | -4.59        | D          |
| 235811_at                      | MBNL1              | Muscleblind-like (Drosophila)                                           | -2.64        | D          | -5.28       | D          | -2.46        | D          |
| 227354_at                      | PAG1               | phosphoprotein associated with glycosphingolipid microdomains 1         | -2.64        | D          | -3.48       | D          | -3.48        | D          |
| 239808_at                      | PITPNC1            | Phosphatidylinositol transfer protein, cytoplasmic 1                    | -2.64        | D          | -4.59       | D          | -2.46        | D          |
| 213093_at                      | PRKCA              | protein kinase C, alpha                                                 | -2.64        | D          | -2.83       | D          | -2.64        | D          |
| 233314_at                      | PTEN               | phosphatase and tensin homolog (mutated in multiple advanced cancers 1) | -2.64        | D          | -4.00       | D          | -2.46        | D          |
| 1557081_at                     | RBM25              | RNA binding motif protein 25                                            | -2.64        | D          | -2.14       | D          | -2.14        | D          |
| 232525_at                      | SND1               | Staphylococcal nuclease domain containing 1                             | -2.64        | D          | -8.00       | D          | -2.00        | D          |
| 230789_at                      | SUHW2              | suppressor of hairy wing homolog 2 (Drosophila)                         | -2.64        | D          | -2.14       | D          | -2.64        | D          |
| 230779_at                      | TNRC6B             | trinucleotide repeat containing 6B                                      | -2.64        | D          | -3.48       | D          | -2.64        | D          |
| 222180_at                      | YES1               | V-yes-1 Yamaguchi sarcoma viral oncogene homolog 1                      | -2.64        | D          | -3.73       | D          | -2.30        | D          |
| 228661_s_at                    | ---                | CDNA FLJ11489 fis, clone HEMBA1001915                                   | -2.83        | D          | -3.73       | D          | -2.30        | D          |
| 1569482_at                     | ---                | CDNA clone IMAGE:5285066                                                | -2.83        | D          | -4.92       | D          | -2.83        | D          |
| 1568780_at                     | ---                | Hypothetical LOC497257                                                  | -2.83        | D          | -2.46       | D          | -3.03        | D          |
| 239017_at                      | ---                | Transcribed locus, moderately similar to XP_497913.1                    | -2.83        | D          | -3.73       | D          | -2.00        | D          |
| 244035_at                      | BCL2               | B-cell CLL/lymphoma 2                                                   | -2.83        | D          | -3.48       | D          | -4.29        | D          |
| 220243_at                      | BTBD15             | BTB (POZ) domain containing 15                                          | -2.83        | D          | -13.93      | D          | -2.14        | D          |
| 213596_at                      | CASP4              | caspace 4, apoptosis-related cysteine peptidase                         | -2.83        | D          | -2.30       | D          | -2.14        | D          |
| 244413_at                      | DCAL1              | dendritic cell-associated lectin-1                                      | -2.83        | D          | -3.48       | D          | -42.22       | D          |
| 225656_at                      | EFHC1              | EF-hand domain (C-terminal) containing 1                                | -2.83        | D          | -3.03       | D          | -2.00        | D          |
| 218532_s_at                    | FLJ20152           | hypothetical protein FLJ20152                                           | -2.83        | D          | -3.25       | D          | -13.00       | D          |
| 226218_at                      | IL7R               | Interleukin 7 receptor                                                  | -2.83        | D          | -9.85       | D          | -11.31       | D          |
| 1557261_at                     | LOC339005          | hypothetical protein LOC339005                                          | -2.83        | D          | -3.03       | D          | -16.00       | D          |
| 234970_at                      | MTAC2D1            | membrane targeting (tandem) C2 domain containing 1                      | -2.83        | D          | -4.59       | D          | -8.00        | D          |
| 240829_at                      | PEX3               | Peroxisomal biogenesis factor 3                                         | -2.83        | D          | -5.66       | D          | -2.14        | D          |
| 229553_at                      | PGM2L1             | phosphoglucomutase 2-like 1                                             | -2.83        | D          | -3.73       | D          | -2.83        | D          |
| 1569597_at                     | PITPNC1            | Phosphatidylinositol transfer protein, cytoplasmic 1                    | -2.83        | D          | -2.64       | D          | -2.30        | D          |
| 242388_x_at                    | TAGAP              | T-cell activation GTPase activating protein                             | -2.83        | D          | -8.00       | D          | -3.25        | D          |
| 238277_at                      | TNKS               | Tankyrase, TRF1-interacting ankyrin-related ADP-ribose polymerase       | -2.83        | D          | -11.31      | D          | -4.59        | D          |
| 235761_at                      | TPST2              | Tyrosylprotein sulfotransferase 2                                       | -2.83        | D          | -2.14       | D          | -4.59        | D          |
| 201369_s_at                    | ZFP36L2            | zinc finger protein 36, C3H type-like 2                                 | -2.83        | D          | -2.30       | D          | -2.64        | D          |
| 238970_at                      | ZFR                | Zinc finger RNA binding protein                                         | -2.83        | D          | -2.46       | D          | -2.64        | D          |
| 228393_s_at                    | ZNF302             | zinc finger protein 302                                                 | -2.83        | D          | -3.25       | D          | -2.00        | D          |
| 233169_at                      | ZNF350             | zinc finger protein 350                                                 | -2.83        | D          | -2.30       | D          | -4.29        | D          |
| 244422_at                      | ---                | Transcribed locus                                                       | -3.03        | D          | -5.66       | D          | -4.59        | D          |
| 241365_at                      | ---                | CDNA FLJ42259 fis, clone TKIDN2011289                                   | -3.03        | D          | -5.28       | D          | -2.46        | D          |
| 201674_s_at                    | AKAP1              | A kinase (PRKA) anchor protein 1                                        | -3.03        | D          | -2.83       | D          | -2.30        | D          |
| 215907_at                      | BACH2              | BTB and CNC homology 1, basic leucine zipper transcription factor 2     | -3.03        | D          | -2.64       | D          | -2.00        | D          |
| 1556451_at                     | BACH2              | BTB and CNC homology 1, basic leucine zipper transcription factor 2     | -3.03        | D          | -2.83       | D          | -8.00        | D          |
| 212560_at                      | C11orf32           | chromosome 11 open reading frame 32                                     | -3.03        | D          | -3.03       | D          | -24.25       | D          |
| <b>AFFYMETRIX PROBE SET ID</b> | <b>GENE SYMBOL</b> | <b>GENE TITLE</b>                                                       | <b>FC#22</b> | <b>I/D</b> | <b>FC#2</b> | <b>I/D</b> | <b>FC#26</b> | <b>I/D</b> |



|                                |                    |                                                                                                  |              |            |             |            |              |            |
|--------------------------------|--------------------|--------------------------------------------------------------------------------------------------|--------------|------------|-------------|------------|--------------|------------|
| 211208_s_at                    | CASK               | calcium/calmodulin-dependent serine protein kinase (MAGUK family)                                | -3.03        | D          | -2.64       | D          | -11.31       | D          |
| 206337_at                      | CCR7               | chemokine (C-C motif) receptor 7 /// chemokine (C-C motif) receptor 7                            | -3.03        | D          | -6.06       | D          | -9.85        | D          |
| 205250_s_at                    | Cep290             | centrosome protein cep290                                                                        | -3.03        | D          | -4.00       | D          | -2.30        | D          |
| 218805_at                      | GIMAP5             | GTPase, IMAP family member 5 /// GTPase, IMAP family member 5                                    | -3.03        | D          | -6.06       | D          | -2.00        | D          |
| 238880_at                      | GTF3A              | general transcription factor IIIA                                                                | -3.03        | D          | -3.73       | D          | -2.30        | D          |
| 217022_s_at                    | IGHA1              | immunoglobulin heavy constant alpha 1                                                            | -3.03        | D          | -29.86      | D          | -21.11       | D          |
| 212677_s_at                    | KIAA0582           | KIAA0582                                                                                         | -3.03        | D          | -2.83       | D          | -2.30        | D          |
| 219922_s_at                    | LTBP3              | latent transforming growth factor beta binding protein 3                                         | -3.03        | D          | -2.83       | D          | -5.28        | D          |
| 238722_x_at                    | NAPE-PLD           | N-acyl-phosphatidylethanolamine-hydrolyzing phospholipase D                                      | -3.03        | D          | -4.00       | D          | -2.30        | D          |
| 203413_at                      | NELL2              | NEL-like 2 (chicken) /// NEL-like 2 (chicken)                                                    | -3.03        | D          | -3.73       | D          | -11.31       | D          |
| 203939_at                      | NT5E               | 5'-nucleotidase, ecto (CD73)                                                                     | -3.03        | D          | -7.46       | D          | -14.93       | D          |
| 237456_at                      | RYBP               | RING1 and YY1 binding protein                                                                    | -3.03        | D          | -2.64       | D          | -3.03        | D          |
| 218346_s_at                    | SESN1              | sestrin 1                                                                                        | -3.03        | D          | -2.14       | D          | -2.14        | D          |
| 203509_at                      | SORL1              | sortilin-related receptor, L(DLR class) A repeats-containing                                     | -3.03        | D          | -3.03       | D          | -13.93       | D          |
| 225583_at                      | UXS1               | UDP-glucuronate decarboxylase 1                                                                  | -3.03        | D          | -2.00       | D          | -4.92        | D          |
| 205883_at                      | ZBTB16             | zinc finger and BTB domain containing 16                                                         | -3.03        | D          | -3.03       | D          | -8.57        | D          |
| 238378_at                      | ---                | Transcribed locus                                                                                | -3.25        | D          | -4.59       | D          | -2.14        | D          |
| 235046_at                      | ---                | Transcribed locus                                                                                | -3.25        | D          | -11.31      | D          | -2.14        | D          |
| 1556889_s_at                   | ---                | CDNA FLJ37963 fis, clone CTONG2009689                                                            | -3.25        | D          | -6.06       | D          | -13.00       | D          |
| 228416_at                      | ACVR2A             | activin A receptor, type IIA                                                                     | -3.25        | D          | -2.83       | D          | -2.46        | D          |
| 1555372_at                     | BCL2L11            | BCL2-like 11 (apoptosis facilitator)                                                             | -3.25        | D          | -4.59       | D          | -2.14        | D          |
| 224367_at                      | BEX2               | brain expressed X-linked 2 /// brain expressed X-linked 2                                        | -3.25        | D          | -4.00       | D          | -12.13       | D          |
| 207996_s_at                    | C18orf1            | chromosome 18 open reading frame 1                                                               | -3.25        | D          | -2.46       | D          | -3.73        | D          |
| 230489_at                      | CD5                | CD5 antigen (p56-62)                                                                             | -3.25        | D          | -2.64       | D          | -5.28        | D          |
| 222620_s_at                    | DNAJC1             | DnaJ (Hsp40) homolog, subfamily C, member 1                                                      | -3.25        | D          | -2.64       | D          | -2.00        | D          |
| 218885_s_at                    | GALNT12            | UDP-N-acetyl-alpha-D-galactosamine:polypeptide N-acetylgalactosaminyltransferase 12 (GalNAc-T12) | -3.25        | D          | -3.03       | D          | -2.14        | D          |
| 210095_s_at                    | IGFBP3             | insulin-like growth factor binding protein 3                                                     | -3.25        | D          | -3.73       | D          | -18.38       | D          |
| 205798_at                      | IL7R               | interleukin 7 receptor                                                                           | -3.25        | D          | -7.46       | D          | -7.46        | D          |
| 240613_at                      | JAK1               | Janus kinase 1 (a protein tyrosine kinase)                                                       | -3.25        | D          | -4.00       | D          | -2.30        | D          |
| 243030_at                      | MAP3K1             | Mitogen-activated protein kinase kinase 1                                                        | -3.25        | D          | -2.00       | D          | -2.14        | D          |
| 1556306_at                     | MLL5               | Myeloid/lymphoid or mixed-lineage leukemia 5 (trithorax homolog, Drosophila)                     | -3.25        | D          | -3.03       | D          | -2.14        | D          |
| 241155_at                      | PIP5K2A            | Phosphatidylinositol-4-phosphate 5-kinase, type II, alpha                                        | -3.25        | D          | -5.28       | D          | -2.83        | D          |
| 213222_at                      | PLCB1              | phospholipase C, beta 1 (phosphoinositide-specific)                                              | -3.25        | D          | -2.83       | D          | -6.96        | D          |
| 220418_at                      | UBASH3A            | ubiquitin associated and SH3 domain containing, A                                                | -3.25        | D          | -5.66       | D          | -2.64        | D          |
| 242819_at                      | ---                | ---                                                                                              | -3.48        | D          | -4.92       | D          | -3.03        | D          |
| 238875_at                      | ---                | Transcribed locus                                                                                | -3.48        | D          | -4.00       | D          | -2.30        | D          |
| 214298_x_at                    | SEPT6              | septin 6                                                                                         | -3.48        | D          | -2.64       | D          | -3.73        | D          |
| 241705_at                      | ABCA5              | ATP-binding cassette, sub-family A (ABC1), member 5                                              | -3.48        | D          | -3.25       | D          | -4.00        | D          |
| 223961_s_at                    | CISH               | cytokine inducible SH2-containing protein                                                        | -3.48        | D          | -3.25       | D          | -8.00        | D          |
| 204720_s_at                    | DNAJC6             | DnaJ (Hsp40) homolog, subfamily C, member 6                                                      | -3.48        | D          | -4.59       | D          | -27.86       | D          |
| 230923_at                      | FAM19A1            | family with sequence similarity 19 (chemokine (C-C motif)-like), member A1                       | -3.48        | D          | -9.85       | D          | -6.06        | D          |
| 243709_at                      | FLJ90709           | hypothetical protein FLJ90709                                                                    | -3.48        | D          | -4.00       | D          | -2.14        | D          |
| 239533_at                      | GPR155             | G protein-coupled receptor 155                                                                   | -3.48        | D          | -2.00       | D          | -6.06        | D          |
| 204793_at                      | GPRASP1            | G protein-coupled receptor associated sorting protein 1                                          | -3.48        | D          | -6.50       | D          | -10.56       | D          |
| 228793_at                      | JMJD1C             | jumonji domain containing 1C                                                                     | -3.48        | D          | -4.29       | D          | -2.83        | D          |
| 239442_at                      | KIAA0582           | KIAA0582                                                                                         | -3.48        | D          | -2.83       | D          | -2.46        | D          |
| 213457_at                      | MFHAS1             | malignant fibrous histiocytoma amplified sequence 1                                              | -3.48        | D          | -2.83       | D          | -16.00       | D          |
| 225626_at                      | PAG1               | phosphoprotein associated with glycosphingolipid microdomains 1                                  | -3.48        | D          | -4.59       | D          | -2.46        | D          |
| 215175_at                      | PCNX               | pecanex homolog (Drosophila)                                                                     | -3.48        | D          | -2.00       | D          | -2.00        | D          |
| 222392_x_at                    | PERP               | PERP, TP53 apoptosis effector                                                                    | -3.48        | D          | -2.14       | D          | -5.66        | D          |
| 1557738_at                     | RAB6IP2            | RAB6 interacting protein 2                                                                       | -3.48        | D          | -3.73       | MD         | -3.73        | D          |
| 232231_at                      | RUNX2              | runt-related transcription factor 2                                                              | -3.48        | D          | -4.00       | D          | -24.25       | D          |
| 203580_s_at                    | SLC7A6             | solute carrier family 7 (cationic amino acid transporter, y+ system), member 6                   | -3.48        | D          | -3.25       | D          | -3.48        | D          |
| 1556839_s_at                   | SPTBN5             | Spectrin, beta, non-erythrocytic 5                                                               | -3.48        | D          | -2.83       | D          | -4.00        | D          |
| 232077_s_at                    | YPPEL3             | yippee-like 3 (Drosophila)                                                                       | -3.48        | D          | -3.48       | D          | -2.30        | D          |
| 228208_x_at                    | ZNF354C            | Zinc finger protein 354C                                                                         | -3.48        | D          | -2.14       | D          | -29.86       | D          |
| AFFX-HUMRGE/M10098_M_at        | ---                | ---                                                                                              | -3.73        | D          | -2.64       | D          | -5.66        | D          |
| 241838_at                      | ---                | Transcribed locus                                                                                | -3.73        | D          | -3.25       | D          | -2.83        | D          |
| 239833_at                      | ---                | Transcribed locus                                                                                | -3.73        | D          | -3.48       | D          | -2.46        | D          |
| 239798_at                      | ---                | Transcribed locus                                                                                | -3.73        | D          | -2.83       | D          | -2.14        | D          |
| 237768_x_at                    | ---                | ---                                                                                              | -3.73        | D          | -4.00       | D          | -2.14        | D          |
| 230913_at                      | ---                | Full length insert cDNA clone ZE12B03                                                            | -3.73        | D          | -4.59       | D          | -5.28        | D          |
| <b>AFFXMETRIX PROBE SET ID</b> | <b>GENE SYMBOL</b> | <b>GENE TITLE</b>                                                                                | <b>FC#22</b> | <b>I/D</b> | <b>FC#2</b> | <b>I/D</b> | <b>FC#26</b> | <b>I/D</b> |

|                                |                    |                                                                     |              |            |             |            |              |            |
|--------------------------------|--------------------|---------------------------------------------------------------------|--------------|------------|-------------|------------|--------------|------------|
| 227663_at                      | ---                | CDNA FLJ40901 fis, clone UTERU2003704                               | -3.73        | D          | -5.28       | D          | -2.00        | D          |
| 1558605_at                     | ---                | CDNA FLJ41817 fis, clone NT2RI2013345                               | -3.73        | D          | -4.29       | D          | -2.30        | D          |
| 205434_s_at                    | AAK1               | AP2 associated kinase 1                                             | -3.73        | D          | -3.48       | D          | -2.46        | D          |
| 239579_at                      | ABHD7              | abhydrolase domain containing 7                                     | -3.73        | D          | -3.73       | D          | -22.63       | D          |
| 240568_at                      | AKT3               | Serologically defined colon cancer antigen 8                        | -3.73        | D          | -3.03       | D          | -3.73        | D          |
| 215386_at                      | AUTS2              | Autism susceptibility candidate 2                                   | -3.73        | D          | -27.86      | D          | -21.11       | D          |
| 221234_s_at                    | BACH2              | BTB and CNC homology 1, basic leucine zipper transcription factor 2 | -3.73        | D          | -3.73       | D          | -4.92        | D          |
| 1557239_at                     | BBX                | Bobby sox homolog (Drosophila)                                      | -3.73        | D          | -4.92       | D          | -2.14        | D          |
| 203685_at                      | BCL2               | B-cell CLL/lymphoma 2                                               | -3.73        | D          | -7.46       | D          | -5.28        | D          |
| 239014_at                      | CCAR1              | Cell division cycle and apoptosis regulator 1                       | -3.73        | D          | -2.46       | D          | -2.00        | D          |
| 208806_at                      | CHD3               | chromodomain helicase DNA binding protein 3                         | -3.73        | D          | -3.48       | D          | -2.00        | D          |
| 229193_at                      | CROP               | Cisplatin resistance-associated overexpressed protein               | -3.73        | D          | -4.59       | D          | -2.14        | D          |
| 240971_x_at                    | CUL4A              | Cullin 4A                                                           | -3.73        | D          | -2.64       | D          | -2.14        | D          |
| 232466_at                      | CUL4A              | Cullin 4A                                                           | -3.73        | D          | -3.48       | D          | -2.83        | D          |
| 209570_s_at                    | D4S234E            | DNA segment on chromosome 4 (unique) 234 expressed sequence         | -3.73        | D          | -4.29       | D          | -59.71       | D          |
| 222621_at                      | DNAJC1             | DnaJ (Hsp40) homolog, subfamily C, member 1                         | -3.73        | D          | -2.83       | D          | -3.03        | D          |
| 212642_s_at                    | HIVEP2             | human immunodeficiency virus type I enhancer binding protein 2      | -3.73        | D          | -4.59       | D          | -8.00        | D          |
| 211548_s_at                    | HPGD               | hydroxyprostaglandin dehydrogenase 15-(NAD)                         | -3.73        | D          | -4.92       | D          | -4.29        | D          |
| 223681_s_at                    | INADL              | InaD-like (Drosophila)                                              | -3.73        | D          | -25.99      | D          | -8.00        | D          |
| 221558_s_at                    | LEF1               | lymphoid enhancer-binding factor 1                                  | -3.73        | D          | -5.66       | D          | -13.00       | D          |
| 228046_at                      | LOC152485          | Hypothetical protein LOC152485                                      | -3.73        | D          | -3.48       | D          | -24.25       | D          |
| 222306_at                      | MGC61571           | Hypothetical protein MGC61571                                       | -3.73        | D          | -2.00       | D          | -2.00        | D          |
| 203956_at                      | MORC2              | MORC family CW-type zinc finger 2                                   | -3.73        | D          | -5.66       | D          | -2.46        | D          |
| 1561657_at                     | NCAM1              | Neural cell adhesion molecule 1                                     | -3.73        | D          | -27.86      | D          | -12.13       | D          |
| 241786_at                      | PPP3R1             | Protein phosphatase 3 (formerly 2B), regulatory subunit B, 19kDa    | -3.73        | D          | -3.48       | D          | -2.14        | D          |
| 1561687_a_at                   | ZNF382             | zinc finger protein 382                                             | -3.73        | D          | -4.00       | D          | -16.00       | D          |
| 237747_at                      | ---                | ---                                                                 | -4.00        | D          | -3.73       | D          | -2.30        | D          |
| 227394_at                      | ---                | CDNA FLJ30008 fis, clone 3NB692000029                               | -4.00        | D          | -4.59       | D          | -32.00       | D          |
| 225444_at                      | ---                | Transcribed locus                                                   | -4.00        | D          | -3.48       | D          | -2.00        | D          |
| 244027_at                      | ABCB7              | ATP-binding cassette, sub-family B (MDR/TAP), member 7              | -4.00        | D          | -4.00       | D          | -2.46        | D          |
| 232500_at                      | C20orf74           | chromosome 20 open reading frame 74                                 | -4.00        | D          | -4.59       | D          | -2.30        | D          |
| 1565868_at                     | CD44               | CD44 antigen (homing function and Indian blood group system)        | -4.00        | D          | -4.00       | D          | -4.29        | D          |
| 205288_at                      | CDC14A             | CDC14 cell division cycle 14 homolog A (S. cerevisiae)              | -4.00        | D          | -2.83       | D          | -3.73        | D          |
| 235721_at                      | DTX3               | deltex 3 homolog (Drosophila)                                       | -4.00        | D          | -2.46       | D          | -5.28        | D          |
| 244535_at                      | FOXP1              | Forkhead box P1                                                     | -4.00        | D          | -3.25       | D          | -4.00        | D          |
| 201656_at                      | ITGA6              | integrin, alpha 6                                                   | -4.00        | D          | -13.93      | D          | -10.56       | D          |
| 236999_at                      | KIAA0073           | Peptidylprolyl isomerase domain and WD repeat containing 1          | -4.00        | D          | -2.00       | D          | -2.00        | D          |
| 241790_at                      | KLHL7              | Kelch-like 7 (Drosophila)                                           | -4.00        | D          | -10.56      | D          | -2.30        | D          |
| 244357_at                      | LOC64744           | Stromal membrane-associated protein 1-like                          | -4.00        | D          | -3.25       | D          | -2.64        | D          |
| 211596_s_at                    | LRIG1              | leucine-rich repeats and immunoglobulin-like domains 1              | -4.00        | D          | -4.29       | D          | -4.92        | D          |
| 234148_at                      | LRRCS              | Leucine rich repeat containing 8 family, member D                   | -4.00        | D          | -4.29       | D          | -2.14        | D          |
| 225478_at                      | MFHAS1             | Malignant fibrous histiocytoma amplified sequence 1                 | -4.00        | D          | -4.29       | D          | -9.19        | D          |
| 1552343_s_at                   | PDE7A              | phosphodiesterase 7A                                                | -4.00        | D          | -6.06       | D          | -3.03        | D          |
| 213939_s_at                    | RIPX               | rap2 interacting protein x                                          | -4.00        | D          | -2.30       | D          | -2.83        | D          |
| 244226_s_at                    | SUPT4H1            | Suppressor of Ty 4 homolog 1 (S. cerevisiae)                        | -4.00        | D          | -4.00       | D          | -2.30        | D          |
| 202478_at                      | TRIB2              | tribbles homolog 2 (Drosophila)                                     | -4.00        | D          | -5.28       | D          | -3.73        | D          |
| 226344_at                      | ZMAT1              | zinc finger, matrin type 1                                          | -4.00        | D          | -2.30       | D          | -4.59        | D          |
| 222368_at                      | ---                | CDNA FLJ39459 fis, clone PROST2011439                               | -4.29        | D          | -2.30       | D          | -2.14        | D          |
| 212764_at                      | ---                | ---                                                                 | -4.29        | D          | -3.03       | D          | -9.85        | D          |
| 1561763_at                     | ---                | Clone TM029 mRNA sequence                                           | -4.29        | D          | -4.00       | D          | -2.83        | D          |
| 242876_at                      | AKT3               | Serologically defined colon cancer antigen 8                        | -4.29        | D          | -3.73       | D          | -2.64        | D          |
| 242563_at                      | FCHSD2             | FCH and double SH3 domains 2                                        | -4.29        | D          | -5.66       | D          | -2.83        | D          |
| 241917_at                      | FCHSD2             | FCH and double SH3 domains 2                                        | -4.29        | D          | -3.03       | D          | -2.46        | D          |
| 215221_at                      | FOXP1              | Forkhead box P1                                                     | -4.29        | D          | -3.73       | D          | -6.06        | D          |
| 238000_at                      | KIAA0265           | KIAA0265 protein                                                    | -4.29        | D          | -6.96       | D          | -2.30        | D          |
| 228974_at                      | MGC48625           | Zinc finger protein 677                                             | -4.29        | D          | -13.00      | D          | -6.06        | D          |
| 214582_at                      | PDE3B              | phosphodiesterase 3B, cGMP-inhibited                                | -4.29        | D          | -2.83       | D          | -12.13       | D          |
| 225147_at                      | PSCD3              | pleckstrin homology, Sec7 and coiled-coil domains 3                 | -4.29        | D          | -4.29       | D          | -24.25       | D          |
| 241775_at                      | SCFD1              | Sec1 family domain containing 1                                     | -4.29        | D          | -2.83       | D          | -2.46        | D          |
| 244579_at                      | TRPS1              | Trichorhinophalangeal syndrome I                                    | -4.29        | D          | -2.64       | D          | -2.46        | D          |
| 1557260_a_at                   | ZNF382             | zinc finger protein 382                                             | -4.29        | D          | -8.57       | D          | -128.00      | D          |
| 239819_at                      | ---                | Transcribed locus                                                   | -4.59        | D          | -2.83       | D          | -2.46        | D          |
| <b>AFFYMETRIX PROBE SET ID</b> | <b>GENE SYMBOL</b> | <b>GENE TITLE</b>                                                   | <b>FC#22</b> | <b>I/D</b> | <b>FC#2</b> | <b>I/D</b> | <b>FC#26</b> | <b>I/D</b> |

|                                |                    |                                                                          |              |            |             |            |              |            |
|--------------------------------|--------------------|--------------------------------------------------------------------------|--------------|------------|-------------|------------|--------------|------------|
| 239660_at                      | C20orf74           | chromosome 20 open reading frame 74                                      | -4.59        | D          | -4.00       | D          | -3.73        | D          |
| 223377_x_at                    | CISH               | cytokine inducible SH2-containing protein                                | -4.59        | D          | -4.92       | D          | -7.46        | D          |
| 212977_at                      | CMKOR1             | chemokine orphan receptor 1                                              | -4.59        | D          | -29.86      | D          | -6.06        | D          |
| 232874_at                      | DOCK9              | Dedicator of cytokinesis 9                                               | -4.59        | D          | -3.25       | D          | -2.14        | D          |
| 225864_at                      | FAM84B             | family with sequence similarity 84, member B                             | -4.59        | D          | -3.03       | D          | -119.43      | D          |
| 55872_at                       | GM632              | KIAA1196 protein                                                         | -4.59        | D          | -3.48       | D          | -29.86       | D          |
| 1569041_at                     | JMJD1C             | Hypothetical protein MGC14425                                            | -4.59        | D          | -2.83       | D          | -2.83        | D          |
| 1563455_at                     | KIAA0999           | KIAA0999 protein                                                         | -4.59        | D          | -3.73       | D          | -2.14        | D          |
| 1556462_a_at                   | KLF12              | Kruppel-like factor 12                                                   | -4.59        | D          | -6.06       | D          | -3.03        | D          |
| 209840_s_at                    | LRRN3              | leucine rich repeat neuronal 3                                           | -4.59        | D          | -27.86      | D          | -45.25       | D          |
| 222771_s_at                    | MYEF2              | myelin expression factor 2                                               | -4.59        | D          | -3.03       | D          | -36.76       | D          |
| 239585_at                      | PCAF               | P300/CBP-associated factor                                               | -4.59        | D          | -5.66       | D          | -2.14        | D          |
| 244633_at                      | PIAS2              | Protein inhibitor of activated STAT, 2                                   | -4.59        | D          | -4.29       | D          | -2.14        | D          |
| 244181_at                      | PIK3R1             | Phosphoinositide-3-kinase, regulatory subunit 1 (p85 alpha)              | -4.59        | D          | -4.59       | D          | -8.00        | D          |
| 214917_at                      | PRKAA1             | protein kinase, AMP-activated, alpha 1 catalytic subunit                 | -4.59        | D          | -2.00       | D          | -2.64        | D          |
| 239784_at                      | SMYD3              | SET and MYND domain containing 3                                         | -4.59        | D          | -3.48       | D          | -2.30        | D          |
| 202524_s_at                    | SPOCK2             | sparc/osteonectin, cwcv and kazal-like domains proteoglycan (testican) 2 | -4.59        | D          | -2.46       | D          | -5.28        | D          |
| 212071_s_at                    | SPTBN1             | spectrin, beta, non-erythrocytic 1                                       | -4.59        | D          | -4.59       | D          | -2.83        | D          |
| 230970_at                      | SSH2               | Slingshot homolog 2 (Drosophila)                                         | -4.59        | D          | -7.46       | D          | -2.64        | D          |
| 228818_at                      | TPD52              | Tumor protein D52                                                        | -4.59        | D          | -4.92       | D          | -7.46        | D          |
| 230713_at                      | ZCCHC11            | Zinc finger, CCHC domain containing 11                                   | -4.59        | D          | -3.73       | D          | -2.14        | D          |
| 212655_at                      | ZCCHC14            | zinc finger, CCHC domain containing 14                                   | -4.59        | D          | -3.73       | D          | -2.64        | D          |
| 243729_at                      | ---                | CDNA FLJ37931 fis, clone CTONG2004397                                    | -4.92        | D          | -4.29       | D          | -157.59      | D          |
| 242492_at                      | ---                | ---                                                                      | -4.92        | D          | -4.59       | D          | -2.00        | D          |
| 204567_s_at                    | ABCG1              | ATP-binding cassette, sub-family G (WHITE), member 1                     | -4.92        | D          | -3.73       | D          | -9.85        | D          |
| 219315_s_at                    | C16orf30           | chromosome 16 open reading frame 30                                      | -4.92        | D          | -6.50       | D          | -4.29        | D          |
| 233241_at                      | C20orf19           | chromosome 20 open reading frame 19                                      | -4.92        | D          | -4.59       | D          | -4.29        | D          |
| 239545_at                      | CAS1               | O-acetyltransferase                                                      | -4.92        | D          | -5.66       | D          | -2.00        | D          |
| 222996_s_at                    | CXXC5              | CXXC finger 5                                                            | -4.92        | D          | -3.48       | D          | -10.56       | D          |
| 204642_at                      | EDG1               | endothelial differentiation, sphingolipid G-protein-coupled receptor, 1  | -4.92        | D          | -6.06       | D          | -5.28        | D          |
| 206965_at                      | KLF12              | Kruppel-like factor 12                                                   | -4.92        | D          | -10.56      | D          | -2.64        | D          |
| 239091_at                      | LOC152185          | Hypothetical protein AY099107                                            | -4.92        | D          | -4.92       | D          | -2.14        | D          |
| 1569484_s_at                   | MDN1               | MDN1, midasin homolog (yeast)                                            | -4.92        | D          | -4.92       | D          | -2.64        | D          |
| 213906_at                      | MYBL1              | v-myb myeloblastosis viral oncogene homolog (avian)-like 1               | -4.92        | D          | -7.46       | D          | -6.06        | D          |
| 243997_x_at                    | PSPC1              | Paraspeckle component 1                                                  | -4.92        | D          | -3.03       | D          | -2.30        | D          |
| 205139_s_at                    | UST                | uronyl-2-sulfotransferase                                                | -4.92        | D          | -2.46       | D          | -8.00        | D          |
| 209156_s_at                    | COL6A2             | collagen, type VI, alpha 2                                               | -5.28        | D          | -3.03       | D          | -2.00        | D          |
| 238032_at                      | DHRS3              | Dehydrogenase/reductase (SDR family) member 3                            | -5.28        | D          | -4.29       | D          | -4.92        | D          |
| 236921_at                      | EMB                | Embigin homolog (mouse)                                                  | -5.28        | D          | -8.00       | D          | -2.00        | D          |
| 236379_at                      | EPB41              | Erythrocyte membrane protein band 4.1 (elliptocytosis 1, RH-linked)      | -5.28        | D          | -4.92       | D          | -2.14        | D          |
| 230415_at                      | FOXP1              | Forkhead box P1                                                          | -5.28        | D          | -4.29       | D          | -16.00       | D          |
| 211202_s_at                    | JARID1B            | Jumonji, AT rich interactive domain 1B (RBP2-like)                       | -5.28        | D          | -2.00       | D          | -2.30        | D          |
| 243473_at                      | KIAA0999           | KIAA0999 protein                                                         | -5.28        | D          | -2.30       | D          | -4.29        | D          |
| 234645_at                      | MAML2              | Mastermind-like 2 (Drosophila)                                           | -5.28        | D          | -3.03       | D          | -2.30        | D          |
| 205259_at                      | NR3C2              | nuclear receptor subfamily 3, group C, member 2                          | -5.28        | D          | -6.06       | D          | -2.64        | D          |
| 222371_at                      | PIAS1              | Protein inhibitor of activated STAT, 1                                   | -5.28        | D          | -4.29       | D          | -2.00        | D          |
| 236621_at                      | RPS27              | ribosomal protein S27 (metallopanstimulin 1)                             | -5.28        | D          | -3.03       | D          | -2.30        | D          |
| 241460_at                      | RPS6KA3            | Ribosomal protein S6 kinase, 90kDa, polypeptide 3                        | -5.28        | D          | -10.56      | D          | -2.14        | D          |
| 229513_at                      | STRBP              | Spermatid perinuclear RNA binding protein                                | -5.28        | D          | -6.50       | D          | -5.28        | D          |
| 236978_at                      | THRAP1             | Thyroid hormone receptor associated protein 1                            | -5.28        | D          | -3.73       | D          | -3.73        | D          |
| 1556595_at                     | WWOX               | WW domain containing oxidoreductase                                      | -5.28        | D          | -5.28       | D          | -4.29        | D          |
| 234032_at                      | ZCCHC7             | Zinc finger, CCHC domain containing 7                                    | -5.28        | D          | -4.92       | D          | -2.00        | D          |
| 206448_at                      | ZNF365             | zinc finger protein 365                                                  | -5.28        | D          | -7.46       | D          | -4.92        | D          |
| 244636_at                      | ---                | Transcribed locus                                                        | -5.66        | D          | -2.46       | D          | -2.46        | D          |
| 227576_at                      | ---                | CDNA FLJ43311 fis, clone NT2RI2009855                                    | -5.66        | D          | -5.28       | D          | -2.14        | D          |
| 1559496_at                     | ---                | ---                                                                      | -5.66        | D          | -4.59       | D          | -4.29        | D          |
| 1558409_at                     | ---                | LOC441276                                                                | -5.66        | D          | -2.30       | D          | -6.06        | D          |
| 239449_at                      | ANKH               | Ankylosis, progressive homolog (mouse)                                   | -5.66        | D          | -4.29       | D          | -2.30        | D          |
| 236796_at                      | BACH2              | BTB and CNC homology 1, basic leucine zipper transcription factor 2      | -5.66        | D          | -2.00       | D          | -2.30        | D          |
| 1557240_a_at                   | BBX                | Bobby sox homolog (Drosophila)                                           | -5.66        | D          | -5.66       | D          | -2.64        | D          |
| 233955_x_at                    | CXXC5              | CXXC finger 5                                                            | -5.66        | D          | -3.73       | D          | -9.19        | D          |
| 224516_s_at                    | CXXC5              | CXXC finger 5 /// CXXC finger 5                                          | -5.66        | D          | -3.48       | D          | -8.57        | D          |
| <b>AFFYMETRIX PROBE SET ID</b> | <b>GENE SYMBOL</b> | <b>GENE TITLE</b>                                                        | <b>FC#22</b> | <b>I/D</b> | <b>FC#2</b> | <b>I/D</b> | <b>FC#26</b> | <b>I/D</b> |

|                                |                    |                                                                               |              |            |             |            |              |            |
|--------------------------------|--------------------|-------------------------------------------------------------------------------|--------------|------------|-------------|------------|--------------|------------|
| 201280_s_at                    | DAB2               | disabled homolog 2, mitogen-responsive phosphoprotein (Drosophila)            | -5.66        | D          | -3.03       | D          | -22.63       | D          |
| 233995_at                      | KIAA0372           | KIAA0372                                                                      | -5.66        | D          | -4.29       | D          | -2.46        | D          |
| 239646_at                      | KIAA1961           | KIAA1961 gene                                                                 | -5.66        | D          | -5.66       | D          | -2.14        | D          |
| 236846_at                      | LOC284757          | hypothetical protein LOC284757                                                | -5.66        | D          | -12.13      | D          | -4.92        | D          |
| 218259_at                      | MKL2               | MKL/myocardin-like 2                                                          | -5.66        | D          | -2.46       | D          | -2.30        | D          |
| 225688_s_at                    | PHLDB2             | pleckstrin homology-like domain, family B, member 2                           | -5.66        | D          | -6.50       | D          | -3.03        | D          |
| 234196_at                      | TMCC3              | Transmembrane and coiled-coil domain family 3                                 | -5.66        | D          | -4.29       | D          | -2.30        | D          |
| 239348_at                      | USP31              | Ubiquitin specific peptidase 31                                               | -5.66        | D          | -4.00       | D          | -2.14        | D          |
| 237383_at                      | ---                | Transcribed locus                                                             | -6.06        | D          | -3.73       | D          | -3.48        | D          |
| 232929_at                      | ---                | CDNA FLJ13240 fis, clone OVARC1000496                                         | -6.06        | D          | -9.85       | D          | -3.25        | D          |
| 227747_at                      | ---                | ---                                                                           | -6.06        | D          | -5.66       | D          | -2.30        | D          |
| 229725_at                      | ACSL6              | Acyl-CoA synthetase long-chain family member 6                                | -6.06        | D          | -8.57       | D          | -6.50        | D          |
| 244061_at                      | ARHGAP15           | Rho GTPase activating protein 15                                              | -6.06        | D          | -6.96       | D          | -2.30        | D          |
| 235333_at                      | B4GALT6            | UDP-Gal:betaGlcNAc beta 1,4- galactosyltransferase, polypeptide 6             | -6.06        | D          | -7.46       | D          | -64.00       | D          |
| 217523_at                      | CD44               | CD44 antigen (homing function and Indian blood group system)                  | -6.06        | D          | -3.73       | D          | -4.29        | D          |
| 1561166_a_at                   | FOXP1              | Forkhead box P1                                                               | -6.06        | D          | -5.28       | D          | -5.28        | D          |
| 215385_at                      | FTO                | Fatso                                                                         | -6.06        | D          | -4.59       | D          | -2.30        | D          |
| 237388_at                      | GLMN               | Glomulin, FKBP associated protein                                             | -6.06        | D          | -5.28       | D          | -2.14        | D          |
| 208798_x_at                    | GOLGA8A            | golgi autoantigen, golgin subfamily a, 8A                                     | -6.06        | D          | -5.28       | D          | -3.73        | D          |
| 215316_at                      | HIBADH             | 3-hydroxyisobutyrate dehydrogenase                                            | -6.06        | D          | -18.38      | D          | -2.83        | D          |
| 242920_at                      | KIAA0999           | KIAA0999 protein                                                              | -6.06        | D          | -3.03       | D          | -2.14        | D          |
| 235956_at                      | KIAA1377           | KIAA1377 protein                                                              | -6.06        | D          | -4.92       | D          | -4.00        | D          |
| 1569181_x_at                   | LOC51326           | ADP-ribosylation factor-like                                                  | -6.06        | D          | -2.83       | D          | -2.30        | D          |
| 1569180_at                     | LOC51326           | ADP-ribosylation factor-like                                                  | -6.06        | D          | -3.25       | D          | -2.64        | D          |
| 232369_at                      | MBNL2              | Muscleblind-like 2 (Drosophila)                                               | -6.06        | D          | -6.50       | D          | -2.00        | D          |
| 243233_at                      | PAN3               | PABP1-dependent poly A-specific ribonuclease subunit PAN3                     | -6.06        | D          | -3.73       | D          | -2.14        | D          |
| 220952_s_at                    | PLEKHA5            | pleckstrin homology domain containing, family A member 5                      | -6.06        | D          | -2.30       | D          | -2.30        | D          |
| 230707_at                      | SORL1              | sortilin-related receptor, L(DLR class) A repeats-containing                  | -6.06        | D          | -4.92       | D          | -18.38       | D          |
| 230651_at                      | THOC2              | THO complex 2                                                                 | -6.06        | D          | -4.92       | D          | -2.64        | D          |
| 237895_at                      | TRNC6B             | Trinucleotide repeat containing 6B                                            | -6.06        | D          | -4.00       | D          | -2.00        | D          |
| 1556543_at                     | ZCCHC7             | Zinc finger, CCHC domain containing 7                                         | -6.06        | D          | -9.19       | D          | -2.00        | D          |
| 236474_at                      | ZNF395             | Zinc finger protein 395                                                       | -6.06        | D          | -3.73       | D          | -6.06        | D          |
| 1556952_at                     | ---                | CDNA FLJ37890 fis, clone BRTHA2000574                                         | -6.50        | D          | -4.00       | D          | -3.03        | D          |
| 215388_s_at                    | CFH /// CFHL1      | complement factor H /// complement factor H-related 1                         | -6.50        | D          | -6.06       | D          | -6.50        | D          |
| 237778_at                      | DIAPH2             | Early lymphoid activation protein                                             | -6.50        | D          | -4.00       | D          | -2.14        | D          |
| 206618_at                      | IL18R1             | interleukin 18 receptor 1                                                     | -6.50        | D          | -9.19       | D          | -3.25        | D          |
| 1570021_at                     | LOC360030          | homeobox C14                                                                  | -6.50        | D          | -6.50       | D          | -2.00        | D          |
| 240824_at                      | OBFC1              | Chromosome 21 open reading frame 53                                           | -6.50        | D          | -8.57       | D          | -2.64        | D          |
| 244726_at                      | PLCB1              | Phospholipase C, beta 1 (phosphoinositide-specific)                           | -6.50        | D          | -6.50       | D          | -90.51       | D          |
| 219700_at                      | PLXDC1             | plexin domain containing 1                                                    | -6.50        | D          | -5.66       | D          | -5.66        | D          |
| 239619_at                      | ZNF395             | Zinc finger protein 395                                                       | -6.50        | D          | -4.29       | D          | -10.56       | D          |
| 233037_at                      | ---                | Clone FLB2932 mRNA sequence                                                   | -6.96        | D          | -6.96       | D          | -2.00        | D          |
| 215528_at                      | ---                | MRNA; cDNA DKFZp586O1318 (from clone DKFZp586O1318)                           | -6.96        | D          | -2.83       | D          | -2.83        | D          |
| 1562245_a_at                   | ---                | MRNA; cDNA DKFZp686H1629                                                      | -6.96        | D          | -29.86      | D          | -22.63       | D          |
| 242110_at                      | ARHGAP5            | Rho GTPase activating protein 5                                               | -6.96        | D          | -3.73       | D          | -5.28        | D          |
| 215846_at                      | CDC42SE2           | CDC42 small effector 2                                                        | -6.96        | D          | -4.92       | D          | -3.73        | D          |
| 229055_at                      | GPR68              | G protein-coupled receptor 68                                                 | -6.96        | D          | -3.48       | D          | -6.06        | D          |
| 206666_at                      | GZMK               | granzyme K (granzyme 3; tryptase II) /// granzyme K (granzyme 3; tryptase II) | -6.96        | D          | -10.56      | D          | -16.00       | D          |
| 244774_at                      | PHACTR2            | Phosphatase and actin regulator 2                                             | -6.96        | D          | -3.03       | D          | -42.22       | D          |
| 229483_at                      | UBE2H              | Ubiquitin-conjugating enzyme E2H (UBC8 homolog, yeast)                        | -6.96        | D          | -5.66       | D          | -2.30        | D          |
| 222357_at                      | ZBTB20             | zinc finger and BTB domain containing 20                                      | -6.96        | D          | -5.66       | D          | -2.46        | D          |
| 1558410_s_at                   | ---                | LOC441276                                                                     | -7.46        | D          | -3.25       | D          | -4.29        | D          |
| 232210_at                      | BCL2               | B-cell CLL/lymphoma 2                                                         | -7.46        | D          | -25.99      | D          | -6.96        | D          |
| 243509_at                      | BTG1               | B-cell translocation gene 1, anti-proliferative                               | -7.46        | D          | -5.28       | D          | -2.46        | D          |
| 243640_x_at                    | CDC14A             | CDC14 cell division cycle 14 homolog A (S. cerevisiae)                        | -7.46        | D          | -4.29       | D          | -4.29        | D          |
| 243089_at                      | KLF12              | Kruppel-like factor 12                                                        | -7.46        | D          | -13.00      | D          | -2.83        | D          |
| 1557578_at                     | PHLDB2             | Pleckstrin homology-like domain, family B, member 2                           | -7.46        | D          | -5.66       | D          | -4.59        | D          |
| 239264_at                      | SEC8L1             | SEC8-like 1 (S. cerevisiae)                                                   | -7.46        | D          | -4.29       | D          | -2.46        | D          |
| 232686_at                      | SIGLECP3           | sialic acid binding Ig-like lectin, pseudogene 3                              | -7.46        | D          | -6.50       | D          | -10.56       | D          |
| 220485_s_at                    | SIRPB2             | signal-regulatory protein beta 2                                              | -7.46        | D          | -13.00      | D          | -10.56       | D          |
| 244568_at                      | SYNE2              | Spectrin repeat containing, nuclear envelope 2                                | -7.46        | D          | -10.56      | D          | -2.83        | D          |
| 206150_at                      | TNFRSF7            | tumor necrosis factor receptor superfamily, member 7                          | -7.46        | D          | -13.93      | D          | -45.25       | D          |
| <b>AFFYMETRIX PROBE SET ID</b> | <b>GENE SYMBOL</b> | <b>GENE TITLE</b>                                                             | <b>FC#22</b> | <b>I/D</b> | <b>FC#2</b> | <b>I/D</b> | <b>FC#26</b> | <b>I/D</b> |

|                                |                    |                                                                                     |              |            |             |            |              |            |
|--------------------------------|--------------------|-------------------------------------------------------------------------------------|--------------|------------|-------------|------------|--------------|------------|
| 240254_at                      | TNIK               | TRAF2 and NCK interacting kinase                                                    | -7.46        | D          | -6.96       | D          | -3.03        | D          |
| 218149_s_at                    | ZNF395             | zinc finger protein 395                                                             | -7.46        | D          | -4.59       | D          | -12.13       | D          |
| 236558_at                      | MBNL1              | Muscleblind-like (Drosophila)                                                       | -8.00        | D          | -13.00      | D          | -2.83        | D          |
| 205826_at                      | MYOM2              | myomesin (M-protein) 2, 165kDa /// myomesin (M-protein) 2, 165kDa                   | -8.00        | D          | -3.48       | D          | -9.19        | D          |
| 222317_at                      | PDE3B              | Phosphodiesterase 3B, cGMP-inhibited                                                | -8.00        | D          | -6.06       | D          | -18.38       | D          |
| 226765_at                      | SPTBN1             | Spectrin, beta, non-erythrocytic 1                                                  | -8.00        | D          | -5.66       | D          | -6.50        | D          |
| 206828_at                      | TXK                | TXK tyrosine kinase                                                                 | -8.00        | D          | -7.46       | D          | -13.93       | D          |
| 241391_at                      | ---                | Transcribed locus                                                                   | -8.57        | D          | -3.25       | D          | -2.83        | D          |
| 240865_at                      | ---                | ---                                                                                 | -8.57        | D          | -11.31      | D          | -4.92        | D          |
| 232583_at                      | ---                | CDNA FLJ11435 fis, clone HEMBA1001208                                               | -8.57        | D          | -18.38      | D          | -6.50        | D          |
| 210742_at                      | CDC14A             | CDC14 cell division cycle 14 homolog A (S. cerevisiae)                              | -8.57        | D          | -6.96       | D          | -6.06        | D          |
| 219895_at                      | FAM70A             | family with sequence similarity 70, member A                                        | -8.57        | D          | -2.83       | D          | -36.76       | D          |
| 228423_at                      | FLJ21159           | ASAP                                                                                | -8.57        | D          | -6.96       | D          | -19.70       | D          |
| 220467_at                      | FLJ21272           | hypothetical protein FLJ21272                                                       | -8.57        | D          | -8.57       | D          | -2.83        | D          |
| 240061_at                      | LOC54103           | Hypothetical protein LOC54103                                                       | -8.57        | D          | -5.28       | D          | -2.30        | D          |
| 223543_at                      | PDZK4              | PDZ domain containing 4                                                             | -8.57        | D          | -3.48       | D          | -6.06        | D          |
| 239102_s_at                    | PICALM             | Phosphatidylinositol binding clathrin assembly protein                              | -8.57        | D          | -6.96       | D          | -4.92        | D          |
| 1566608_at                     | SAMD3              | Sterile alpha motif domain containing 3                                             | -8.57        | D          | -8.57       | D          | -2.64        | D          |
| 244878_at                      | ---                | Transcribed locus                                                                   | -9.19        | D          | -8.00       | D          | -2.64        | D          |
| 242874_at                      | ---                | CDNA FLJ37931 fis, clone CTONG2004397                                               | -9.19        | D          | -5.66       | D          | -8.00        | D          |
| 236685_at                      | ---                | Transcribed locus                                                                   | -9.19        | D          | -7.46       | D          | -5.66        | D          |
| 243450_at                      | AKAP13             | A kinase (PRKA) anchor protein 13                                                   | -9.19        | D          | -11.31      | D          | -2.64        | D          |
| 233690_at                      | C21orf96           | Chromosome 21 open reading frame 96                                                 | -9.19        | D          | -11.31      | D          | -2.14        | D          |
| 1558971_at                     | C6orf190           | chromosome 6 open reading frame 190                                                 | -9.19        | D          | -19.70      | D          | -42.22       | D          |
| 1562067_at                     | CERKL              | Ceramide kinase-like                                                                | -9.19        | D          | -5.66       | D          | -2.14        | D          |
| 236210_at                      | DDX31              | DEAD (Asp-Glu-Ala-Asp) box polypeptide 31                                           | -9.19        | D          | -3.03       | D          | -2.46        | D          |
| 244592_at                      | FLI1               | Friend leukemia virus integration 1                                                 | -9.19        | D          | -9.85       | D          | -2.00        | D          |
| 243874_at                      | FLJ42393           | FLJ42393 protein                                                                    | -9.19        | D          | -4.59       | D          | -2.14        | D          |
| 232974_at                      | HDHD1A             | Haloacid dehalogenase-like hydrolase domain containing 1A                           | -9.19        | D          | -6.96       | D          | -2.14        | D          |
| 203914_x_at                    | HPGD               | hydroxyprostaglandin dehydrogenase 15-(NAD)                                         | -9.19        | D          | -2.83       | D          | -2.14        | D          |
| 244414_at                      | MAML2              | Mastermind-like 2 (Drosophila)                                                      | -9.19        | D          | -6.50       | D          | -3.73        | D          |
| 243810_at                      | ---                | Transcribed locus                                                                   | -9.85        | D          | -27.86      | D          | -39.40       | D          |
| 243791_at                      | ---                | Transcribed locus                                                                   | -9.85        | D          | -6.06       | D          | -2.30        | D          |
| 234865_at                      | ---                | T-cell receptor rearranged beta-chain V-region (V-D-J) mRNA, clone ph15 /clone ph21 | -9.85        | D          | -7.46       | D          | -42.22       | D          |
| 228854_at                      | ---                | Transcribed locus                                                                   | -9.85        | D          | -7.46       | D          | -11.31       | D          |
| 244548_at                      | ARHGAP26           | Rho GTPase activating protein 26                                                    | -9.85        | D          | -6.50       | D          | -2.30        | D          |
| 225792_at                      | HOOK1              | Hook homolog 1 (Drosophila)                                                         | -9.85        | D          | -4.59       | D          | -2.46        | D          |
| 232333_at                      | MAML2              | Mastermind-like 2 (Drosophila)                                                      | -9.85        | D          | -6.96       | D          | -4.59        | D          |
| 1559882_at                     | SAMHD1             | SAM domain and HD domain 1                                                          | -9.85        | D          | -2.64       | D          | -2.14        | D          |
| 219423_x_at                    | TNFRSF25           | tumor necrosis factor receptor superfamily, member 25                               | -9.85        | D          | -6.06       | D          | -13.00       | D          |
| 220917_s_at                    | WDR19              | WD repeat domain 19                                                                 | -9.85        | D          | -8.00       | D          | -3.73        | D          |
| 236617_at                      | WWOX               | WW domain containing oxidoreductase                                                 | -9.85        | D          | -5.66       | D          | -4.29        | D          |
| 230332_at                      | ZCCHC7             | Zinc finger, CCHC domain containing 7                                               | -9.85        | D          | -8.00       | D          | -4.00        | D          |
| 240758_at                      | CENTG2             | Centaurin, gamma 2                                                                  | -10.56       | D          | -27.86      | D          | -4.59        | D          |
| 202481_at                      | DHRS3              | dehydrogenase/reductase (SDR family) member 3                                       | -10.56       | D          | -22.63      | D          | -90.51       | D          |
| 242216_at                      | DNAJC1             | DnaJ (Hsp40) homolog, subfamily C, member 1                                         | -10.56       | D          | -6.50       | D          | -4.29        | D          |
| 241692_at                      | HNRPLL             | Heterogeneous nuclear ribonucleoprotein L-like                                      | -10.56       | D          | -6.06       | D          | -2.46        | D          |
| 239946_at                      | KIAA0922           | KIAA0922 protein                                                                    | -10.56       | D          | -8.57       | D          | -2.00        | D          |
| 239673_at                      | NR3C2              | Nuclear receptor subfamily 3, group C, member 2                                     | -10.56       | D          | -9.19       | D          | -5.28        | D          |
| 222330_at                      | PDE3B              | Phosphodiesterase 3B, cGMP-inhibited                                                | -10.56       | D          | -14.93      | D          | -19.70       | D          |
| 232629_at                      | PROK2              | prokineticin 2                                                                      | -10.56       | D          | -3.03       | D          | -59.71       | D          |
| AFFX-HUMRGE/M10098_5_at        | ---                | ---                                                                                 | -11.31       | D          | -11.31      | D          | -18.38       | D          |
| 242827_x_at                    | ---                | Transcribed locus                                                                   | -11.31       | D          | -14.93      | D          | -2.30        | D          |
| 212187_x_at                    | PTGDS              | prostaglandin D2 synthase 21kDa (brain)                                             | -11.31       | D          | -4.92       | D          | -6.06        | D          |
| 242801_at                      | ---                | Similar to 40S ribosomal protein S3                                                 | -12.13       | D          | -2.46       | D          | -11.31       | D          |
| 228623_at                      | ---                | Transcribed locus, weakly similar to XP_517454.1                                    | -12.13       | D          | -8.00       | D          | -2.64        | D          |
| 232882_at                      | FOXO1A             | Forkhead box O1A (rhabdomyosarcoma)                                                 | -12.13       | D          | -8.00       | D          | -3.48        | D          |
| 207072_at                      | IL18RAP            | interleukin 18 receptor accessory protein                                           | -12.13       | D          | -27.86      | D          | -14.93       | D          |
| 1560562_a_at                   | MGC48625           | Zinc finger protein 677                                                             | -12.13       | D          | -24.25      | D          | -17.15       | D          |
| 242737_at                      | RAD51L1            | RAD51-like 1 (S. cerevisiae)                                                        | -12.13       | D          | -8.00       | D          | -2.83        | D          |
| AFFX-HUMRGE/M10098_3_at        | SRP68              | signal recognition particle 68kDa                                                   | -12.13       | D          | -9.85       | D          | -11.31       | D          |
| 239448_at                      | ---                | ---                                                                                 | -13.00       | D          | -3.73       | D          | -7.46        | D          |
| <b>AFFYMETRIX PROBE SET ID</b> | <b>GENE SYMBOL</b> | <b>GENE TITLE</b>                                                                   | <b>FC#22</b> | <b>I/D</b> | <b>FC#2</b> | <b>I/D</b> | <b>FC#26</b> | <b>I/D</b> |

|              |                 |                                                                                         |        |   |        |   |         |   |
|--------------|-----------------|-----------------------------------------------------------------------------------------|--------|---|--------|---|---------|---|
| 207681_at    | CXCR3           | chemokine (C-X-C motif) receptor 3                                                      | -13.00 | D | -7.46  | D | -16.00  | D |
| 1569477_at   | FOXO3A          | Forkhead box O3A                                                                        | -13.00 | D | -4.92  | D | -3.25   | D |
| 242405_at    | MAML2           | Mastermind-like 2 (Drosophila)                                                          | -13.00 | D | -6.06  | D | -4.92   | D |
| 235763_at    | SLC44A5         | solute carrier family 44, member 5                                                      | -13.00 | D | -14.93 | D | -18.38  | D |
| 233614_at    | CBLB            | Cas-Br-M (murine) ecotropic retroviral transforming sequence b                          | -13.93 | D | -9.85  | D | -6.06   | D |
| 202806_at    | DBN1            | drebrin 1                                                                               | -13.93 | D | -29.86 | D | -3.48   | D |
| 209728_at    | HLA-DRB4        | major histocompatibility complex, class II, DR beta 4                                   | -13.93 | D | -51.98 | D | -194.01 | D |
| 214705_at    | INADL           | InaD-like (Drosophila)                                                                  | -13.93 | D | -4.29  | D | -29.86  | D |
| 243310_at    | ---             | Transcribed locus, weakly similar to XP_209041.2                                        | -14.93 | D | -24.25 | D | -2.30   | D |
| 237201_at    | ---             | Transcribed locus                                                                       | -14.93 | D | -6.50  | D | -2.00   | D |
| 1558972_s_at | C6orf190        | chromosome 6 open reading frame 190                                                     | -14.93 | D | -24.25 | D | -27.86  | D |
| 212843_at    | NCAM1           | neural cell adhesion molecule 1                                                         | -14.93 | D | -19.70 | D | -9.85   | D |
| 210612_s_at  | SYNJ2           | synaptojanin 2                                                                          | -14.93 | D | -22.63 | D | -5.28   | D |
| 237035_at    | WWOX            | WW domain containing oxidoreductase                                                     | -14.93 | D | -3.25  | D | -2.30   | D |
| 244239_at    | ANKH            | Ankylosis, progressive homolog (mouse)                                                  | -16.00 | D | -11.31 | D | -2.00   | D |
| 204066_s_at  | CENTG2          | centaurin, gamma 2                                                                      | -17.15 | D | -7.46  | D | -16.00  | D |
| 209686_at    | S100B           | S100 calcium binding protein, beta (neural)                                             | -17.15 | D | -51.98 | D | -9.19   | D |
| 1561195_at   | TM7SF1          | Transmembrane 7 superfamily member 1 (upregulated in kidney)                            | -18.38 | D | -32.00 | D | -4.00   | D |
| 221123_x_at  | ZNF395          | zinc finger protein 395                                                                 | -18.38 | D | -6.96  | D | -9.85   | D |
| 240666_at    | FOXP1           | Forkhead box P1                                                                         | -19.70 | D | -16.00 | D | -3.48   | D |
| 239862_at    | TPD52           | Tumor protein D52                                                                       | -19.70 | D | -27.86 | D | -3.25   | D |
| 1563460_at   | ---             | Similar to 40S ribosomal protein S3                                                     | -21.11 | D | -9.19  | D | -13.93  | D |
| 1558569_at   | MAML2           | Mastermind-like 2 (Drosophila)                                                          | -21.11 | D | -51.98 | D | -6.06   | D |
| 244625_at    | RERE            | Arginine-glutamic acid dipeptide (RE) repeats                                           | -21.11 | D | -3.73  | D | -3.25   | D |
| 206366_x_at  | XCL2            | chemokine (C motif) ligand 2                                                            | -21.11 | D | -5.66  | D | -14.93  | D |
| 232951_at    | ---             | CDNA FLJ10136 fis, clone HEMBA1003129                                                   | -22.63 | D | -11.31 | D | -3.73   | D |
| 203608_at    | ALDH5A1         | aldehyde dehydrogenase 5 family, member A1 (succinate-semialdehyde dehydrogenase)       | -24.25 | D | -6.50  | D | -2.00   | D |
| 232614_at    | BCL2            | B-cell CLL/lymphoma 2                                                                   | -24.25 | D | -19.70 | D | -6.96   | D |
| 1559723_s_at | C9orf3          | Chromosome 9 open reading frame 3                                                       | -24.25 | D | -4.00  | D | -3.03   | D |
| 226764_at    | LOC152485       | hypothetical protein LOC152485                                                          | -24.25 | D | -22.63 | D | -32.00  | D |
| 214567_s_at  | XCL1 /// XCL2   | chemokine (C motif) ligand 1 /// chemokine (C motif) ligand 2                           | -24.25 | D | -6.06  | D | -24.25  | D |
| 222162_s_at  | ADAMTS1         | ADAM metalloproteinase with thrombospondin type 1 motif, 1                              | -25.99 | D | -34.30 | D | -16.00  | D |
| 203628_at    | IGF1R           | insulin-like growth factor 1 receptor                                                   | -27.86 | D | -6.06  | D | -68.59  | D |
| 244860_at    | KIAA0999        | KIAA0999 protein                                                                        | -29.86 | D | -3.48  | D | -2.30   | D |
| 223216_x_at  | ZNF395 / FBXO16 | zinc finger protein 395 /F-box protein 16                                               | -29.86 | D | -25.99 | D | -59.71  | D |
| 244845_at    | ---             | CDNA FLJ45435 fis, clone BRHIP3042817                                                   | -32.00 | D | -9.19  | D | -9.19   | D |
| 236963_at    | ---             | Transcribed locus, weakly similar to XP_371841.1                                        | -32.00 | D | -78.79 | D | -6.06   | D |
| 232565_at    | RAB6IP2         | RAB6 interacting protein 2                                                              | -36.76 | D | -13.93 | D | -2.64   | D |
| 214295_at    | KIAA0485        | KIAA0485 protein                                                                        | -39.40 | D | -13.00 | D | -2.46   | D |
| 232693_s_at  | ZNF395 /FBXO16  | zinc finger protein 395 /F-box protein 16                                               | -42.22 | D | -24.25 | D | -45.25  | D |
| 234402_at    | ---             | T-cell receptor active alpha-chain V-region (V-J-C) mRNA, partial cds, clone AE212      | -45.25 | D | -16.00 | D | -24.25  | D |
| 240347_at    | BTG1            | B-cell translocation gene 1, anti-proliferative                                         | -45.25 | D | -4.59  | D | -2.14   | D |
| 237839_at    | ANK3            | Ankyrin 3, node of Ranvier (ankyrin G)                                                  | -59.71 | D | -17.15 | D | -34.30  | D |
| 1564139_at   | LOC144571       | hypothetical protein LOC144571                                                          | -59.71 | D | -5.66  | D | -39.40  | D |
| 232752_at    | ---             | CDNA FLJ10302 fis, clone NT2RM2000042                                                   | -64.00 | D | -4.00  | D | -5.28   | D |
| 209160_at    | AKR1C3          | aldo-keto reductase family 1, member C3 (3-alpha hydroxysteroid dehydrogenase, type II) | -222.9 | D | -294.1 | D | -776.05 | D |

**List of transcripts concordantly up- and downregulated in all three LGL patients vs. healthy noneffector CD8+CD57- population.**

**(page 15-38)**

FC indicates foldchange in transcript expression in patient sample when compared to control CD57+ cells; I/D, increase/decrease in transcript expression.

| AFFYMETRIX PROBE SET ID | GENE SYMBOL | GENE TITLE                                                                 | FC#22  | I/D | FC#2   | I/D | FC#26   | I/D |
|-------------------------|-------------|----------------------------------------------------------------------------|--------|-----|--------|-----|---------|-----|
| 1556545_at              | ---         | CDNA FLJ32379 fis, clone SKMUS1000030                                      | 2.30   |     | 6.50   |     | 4.00    |     |
| 1556676_a_at            | ---         | CDNA clone IMAGE:4793171                                                   | 2.14   |     | 2.30   |     | 4.00    |     |
| 1557051_s_at            | ---         | Homo sapiens, clone IMAGE:5019307, mRNA                                    | 3.73   |     | 4.59   |     | 2.30    |     |
| 1559067_a_at            | ---         | Transcribed locus                                                          | 3.48   |     | 2.46   |     | 4.00    |     |
| 1562289_at              | ---         | MRNA; cDNA DKFZp434N0220 (from clone DKFZp434N0220)                        | 3.25   |     | 2.14   |     | 11.31   |     |
| 1562634_at              | ---         | Homo sapiens, clone IMAGE:5169164, mRNA                                    | 9.19   |     | 59.71  |     | 8.00    |     |
| 1570541_s_at            | ---         | Homo sapiens, clone IMAGE:4042735, mRNA                                    | 21.11  |     | 39.40  |     | 8.57    |     |
| 225791_at               | ---         | ---                                                                        | 2.14   |     | 2.46   |     | 3.03    |     |
| 227396_at               | ---         | Homo sapiens, clone IMAGE:4454331, mRNA                                    | 3.48   |     | 3.03   |     | 4.59    |     |
| 227745_at               | ---         | CDNA FLJ90571 fis, clone OVARC1001725                                      | 3.03   |     | 4.29   |     | 4.92    |     |
| 228108_at               | ---         | CDNA clone IMAGE:5263177                                                   | 2.46   |     | 2.30   |     | 6.50    |     |
| 228273_at               | ---         | Transcribed locus                                                          | 5.28   |     | 6.50   |     | 2.83    |     |
| 228333_at               | ---         | Full length insert cDNA clone YT94E02                                      | 5.66   |     | 2.30   |     | 6.96    |     |
| 228457_at               | ---         | CDNA clone IMAGE:5263177                                                   | 3.48   |     | 2.14   |     | 3.48    |     |
| 228642_at               | ---         | Homo sapiens, clone IMAGE:5019307, mRNA                                    | 4.00   |     | 4.00   |     | 4.29    |     |
| 229309_at               | ---         | Beta-1 adrenergic receptor mRNA, 3' UTR                                    | 6.96   |     | 10.56  |     | 29.86   |     |
| 229450_at               | ---         | ---                                                                        | 8.57   |     | 5.66   |     | 5.28    |     |
| 229506_at               | ---         | CDNA clone IMAGE:5263177                                                   | 5.28   |     | 4.59   |     | 5.66    |     |
| 230741_at               | ---         | Full length insert cDNA clone YX74D05                                      | 2.46   |     | 4.00   |     | 3.03    |     |
| 230917_at               | ---         | CDNA FLJ45450 fis, clone BRSTN2002691                                      | 8.57   |     | 4.00   |     | 6.50    |     |
| 235122_at               | ---         | CDNA clone IMAGE:6254031                                                   | 3.03   |     | 3.03   |     | 4.59    |     |
| 235171_at               | ---         | Full-length cDNA clone CS0DM012YE14 of Fetal liver of Homo sapiens (human) | 6.96   |     | 3.25   |     | 9.19    |     |
| 235293_at               | ---         | CDNA FLJ37816 fis, clone BRSSN2003093                                      | 4.92   |     | 4.29   |     | 2.30    |     |
| 235539_at               | ---         | ---                                                                        | 2.00   |     | 2.30   |     | 2.46    |     |
| 235919_at               | ---         | Transcribed locus, weakly similar to NP_055301.1                           | 3.73   |     | 2.00   |     | 5.66    |     |
| 237542_at               | ---         | Transcribed locus                                                          | 3.25   |     | 5.66   |     | 3.25    |     |
| 238725_at               | ---         | ---                                                                        | 2.14   |     | 3.25   |     | 4.29    |     |
| 242181_at               | ---         | CDNA FLJ33489 fis, clone BRAMY2003585                                      | 8.57   |     | 4.29   |     | 14.93   |     |
| AFFX-DapX-3_at          | ---         | ---                                                                        | 103.97 |     | 97.01  |     | 294.07  |     |
| AFFX-DapX-5_at          | ---         | ---                                                                        | 59.71  |     | 59.71  |     | 181.02  |     |
| AFFX-DapX-M_at          | ---         | ---                                                                        | 27.86  |     | 19.70  |     | 119.43  |     |
| AFFX-LysX-3_at          | ---         | ---                                                                        | 8.57   |     | 6.06   |     | 18.38   |     |
| AFFX-PheX-3_at          | ---         | ---                                                                        | 3.73   |     | 4.92   |     | 12.13   |     |
| AFFX-r2-Bs-dap-3_at     | ---         | ---                                                                        | 294.07 |     | 274.37 |     | 2352.00 |     |
| AFFX-r2-Bs-dap-5_at     | ---         | ---                                                                        | 477.71 |     | 388.02 |     | 2194.00 |     |
| AFFX-r2-Bs-dap-M_at     | ---         | ---                                                                        | 34.30  |     | 21.11  |     | 111.43  |     |
| AFFX-r2-Bs-phe-5_at     | ---         | ---                                                                        | 64.00  |     | 68.59  |     | 477.71  |     |
| AFFX-r2-Bs-thr-5_s_at   | ---         | ---                                                                        | 4.29   |     | 4.29   |     | 8.57    |     |
| AFFX-r2-Bs-thr-M_s_at   | ---         | ---                                                                        | 6.96   |     | 5.28   |     | 13.93   |     |
| AFFX-ThrX-3_at          | ---         | ---                                                                        | 59.71  |     | 78.79  |     | 512.00  |     |
| AFFX-ThrX-M_at          | ---         | ---                                                                        | 3.73   |     | 2.83   |     | 13.93   |     |
| 212895_s_at             | ABR         | active BCR-related gene                                                    | 2.00   |     | 2.30   |     | 2.83    |     |
| 214671_s_at             | ABR         | active BCR-related gene                                                    | 3.03   |     | 3.73   |     | 2.00    |     |
| 208002_s_at             | ACOT7       | acyl-CoA thioesterase 7                                                    | 6.96   |     | 5.66   |     | 4.92    |     |
| 205180_s_at             | ADAM8       | ADAM metalloproteinase domain 8                                            | 2.83   |     | 2.64   |     | 4.29    |     |
| 206513_at               | AIM2        | absent in melanoma 2                                                       | 3.03   |     | 2.30   |     | 2.30    |     |
| 201590_x_at             | ANXA2       | annexin A2                                                                 | 2.30   |     | 3.48   |     | 2.83    |     |
| 210427_x_at             | ANXA2       | annexin A2                                                                 | 2.14   |     | 3.25   |     | 2.64    |     |
| 213503_x_at             | ANXA2       | annexin A2                                                                 | 2.30   |     | 3.48   |     | 2.83    |     |
| 201301_s_at             | ANXA4       | annexin A4                                                                 | 2.83   |     | 5.28   |     | 2.30    |     |

| AFFYMETRIX PROBE SET ID | GENE SYMBOL | GENE TITLE                                                                        | FC#22 | I/D | FC#2  | I/D | FC#26 | I/D |
|-------------------------|-------------|-----------------------------------------------------------------------------------|-------|-----|-------|-----|-------|-----|
| 201302_at               | ANXA4       | annexin A4                                                                        | 2.64  |     | 4.92  |     | 2.14  |     |
| 205639_at               | AOAH        | acyloxyacyl hydrolase (neutrophil)                                                | 4.59  |     | 4.29  |     | 6.06  |     |
| 209546_s_at             | APOL1       | apolipoprotein L, 1                                                               | 3.25  |     | 2.00  |     | 2.46  |     |
| 225171_at               | ARHGAP18    | Rho GTPase activating protein 18                                                  | 2.00  |     | 2.30  |     | 2.30  |     |
| 201334_s_at             | ARHGEF12    | Rho guanine nucleotide exchange factor (GEF) 12                                   | 3.03  |     | 2.00  |     | 3.25  |     |
| 226914_at               | ARPC5L      | actin related protein 2/3 complex, subunit 5-like                                 | 2.64  |     | 2.00  |     | 4.59  |     |
| 218832_x_at             | ARRB1       | arrestin, beta 1                                                                  | 34.30 |     | 36.76 |     | 17.15 |     |
| 222756_s_at             | ARRB1       | arrestin, beta 1                                                                  | 3.03  |     | 4.00  |     | 2.30  |     |
| 222912_at               | ARRB1       | arrestin, beta 1                                                                  | 3.03  |     | 4.92  |     | 2.64  |     |
| 1555419_a_at            | ASAH1       | N-acylsphingosine amidohydrolase (acid ceramidase) 1                              | 3.03  |     | 4.29  |     | 2.30  |     |
| 202672_s_at             | ATF3        | activating transcription factor 3                                                 | 11.31 |     | 32.00 |     | 8.00  |     |
| 208836_at               | ATP1B3      | ATPase, Na+/K+ transporting, beta 3 polypeptide                                   | 2.64  |     | 3.03  |     | 3.73  |     |
| 201818_at               | AYTL2       | acyltransferase like 2                                                            | 3.25  |     | 2.14  |     | 4.59  |     |
| 219521_at               | B3GAT1      | beta-1,3-glucuronyltransferase 1 (glucuronosyltransferase P)                      | 59.71 |     | 25.99 |     | 68.59 |     |
| 221485_at               | B4GALT5     | UDP-Gal:betaGlcNAc beta 1,4- galactosyltransferase, polypeptide 5                 | 2.83  |     | 2.14  |     | 2.30  |     |
| 204908_s_at             | BCL3        | B-cell CLL/lymphoma 3                                                             | 2.46  |     | 3.73  |     | 4.00  |     |
| 206746_at               | BFSP1       | beaded filament structural protein 1, filensin                                    | 27.86 |     | 18.38 |     | 78.79 |     |
| 201170_s_at             | BHLHB2      | basic helix-loop-helix domain containing, class B, 2                              | 3.03  |     | 3.03  |     | 2.30  |     |
| 229437_at               | BIC         | BIC transcript                                                                    | 4.00  |     | 3.03  |     | 3.03  |     |
| 230722_at               | BNC2        | Basonuclin 2                                                                      | 4.29  |     | 2.83  |     | 19.70 |     |
| 238478_at               | BNC2        | Basonuclin 2                                                                      | 3.25  |     | 3.25  |     | 18.38 |     |
| 203502_at               | BPGM        | 2,3-bisphosphoglycerate mutase                                                    | 4.59  |     | 2.64  |     | 2.30  |     |
| 1568768_s_at            | BRE         | brain and reproductive organ-expressed (TNFRSF1A modulator)                       | 6.06  |     | 11.31 |     | 3.48  |     |
| 205548_s_at             | BTG3        | BTG family, member 3                                                              | 2.46  |     | 2.83  |     | 4.29  |     |
| 213134_x_at             | BTG3        | BTG family, member 3                                                              | 2.46  |     | 3.25  |     | 4.00  |     |
| 205839_s_at             | BZRAP1      | benzodiazapine receptor (peripheral) associated protein 1                         | 3.03  |     | 2.46  |     | 2.30  |     |
| 227699_at               | C14orf149   | chromosome 14 open reading frame 149                                              | 2.14  |     | 3.03  |     | 2.46  |     |
| 226901_at               | C17orf58    | chromosome 17 open reading frame 58                                               | 4.29  |     | 4.00  |     | 5.28  |     |
| 1557016_a_at            | C1orf177    | chromosome 1 open reading frame 177                                               | 5.28  |     | 2.30  |     | 6.96  |     |
| 221272_s_at             | C1orf21     | chromosome 1 open reading frame 21                                                | 4.00  |     | 3.48  |     | 9.85  |     |
| 223125_s_at             | C1orf21     | chromosome 1 open reading frame 21                                                | 6.06  |     | 3.73  |     | 11.31 |     |
| 223126_s_at             | C1orf21     | chromosome 1 open reading frame 21                                                | 5.66  |     | 3.25  |     | 13.93 |     |
| 1553338_at              | C1orf55     | chromosome 1 open reading frame 55                                                | 2.30  |     | 3.48  |     | 2.30  |     |
| 217835_x_at             | C20orf24    | chromosome 20 open reading frame 24                                               | 2.00  |     | 2.46  |     | 2.00  |     |
| 206656_s_at             | C20orf3     | chromosome 20 open reading frame 3                                                | 2.30  |     | 2.00  |     | 3.25  |     |
| 209906_at               | C3AR1       | complement component 3a receptor 1                                                | 3.73  |     | 3.48  |     | 2.64  |     |
| 1554486_a_at            | C6orf114    | chromosome 6 open reading frame 114                                               | 4.29  |     | 4.29  |     | 5.66  |     |
| 206011_at               | CASP1       | caspase 1, apoptosis-related cysteine peptidase (interleukin 1, beta, convertase) | 2.46  |     | 2.14  |     | 2.14  |     |
| 209970_x_at             | CASP1       | caspase 1, apoptosis-related cysteine peptidase (interleukin 1, beta, convertase) | 2.14  |     | 2.30  |     | 2.46  |     |
| 211366_x_at             | CASP1       | caspase 1, apoptosis-related cysteine peptidase (interleukin 1, beta, convertase) | 2.14  |     | 2.30  |     | 2.64  |     |
| 211367_s_at             | CASP1       | caspase 1, apoptosis-related cysteine peptidase (interleukin 1, beta, convertase) | 2.64  |     | 2.46  |     | 2.30  |     |
| 211368_s_at             | CASP1       | caspase 1, apoptosis-related cysteine peptidase (interleukin 1, beta, convertase) | 2.00  |     | 2.14  |     | 2.30  |     |
| 205114_s_at             | CCL3        | chemokine (C-C motif) ligand 3                                                    | 2.00  |     | 8.00  |     | 9.85  |     |
| 204103_at               | CCL4        | chemokine (C-C motif) ligand 4                                                    | 4.00  |     | 2.00  |     | 3.48  |     |
| 1555827_at              | CCNL1       | Cyclin L1                                                                         | 2.30  |     | 4.29  |     | 3.03  |     |
| 220307_at               | CD244       | CD244 molecule, natural killer cell receptor 2B4                                  | 4.00  |     | 2.30  |     | 4.92  |     |
| 205692_s_at             | CD38        | CD38 molecule                                                                     | 6.06  |     | 5.28  |     | 9.85  |     |
| 236191_at               | CD38        | CD38 molecule                                                                     | 3.48  |     | 9.19  |     | 10.56 |     |
| 205173_x_at             | CD58        | CD58 molecule                                                                     | 2.30  |     | 2.64  |     | 2.83  |     |
| 211744_s_at             | CD58        | CD58 molecule /// CD58 molecule                                                   | 2.46  |     | 2.83  |     | 2.83  |     |
| 216942_s_at             | CD58        | CD58 molecule                                                                     | 2.46  |     | 3.03  |     | 2.46  |     |
| 200663_at               | CD63        | CD63 molecule                                                                     | 2.83  |     | 3.48  |     | 3.25  |     |
| 209644_x_at             | CDKN2A      | cyclin-dependent kinase inhibitor 2A (melanoma, p16, inhibits CDK4)               | 8.57  |     | 4.92  |     | 2.46  |     |
| 204039_at               | CEBPA       | CCAAT/enhancer binding protein (C/EBP), alpha                                     | 4.00  |     | 10.56 |     | 3.25  |     |
| 219150_s_at             | CENTA1      | centaurin, alpha 1                                                                | 3.48  |     | 3.73  |     | 2.46  |     |
| 90265_at                | CENTA1      | centaurin, alpha 1                                                                | 3.03  |     | 3.73  |     | 3.48  |     |
| 1557985_s_at            | CEP78       | centrosomal protein 78kDa                                                         | 4.29  |     | 2.83  |     | 6.96  |     |
| 228774_at               | CEP78       | centrosomal protein 78kDa                                                         | 3.73  |     | 2.64  |     | 8.00  |     |
| 213385_at               | CHN2        | chimerin (chimaerin) 2                                                            | 2.64  |     | 2.83  |     | 5.28  |     |
| 218927_s_at             | CHST12      | carbohydrate (chondroitin 4) sulfotransferase 12                                  | 3.73  |     | 2.30  |     | 2.83  |     |
| 219529_at               | CLIC3       | chloride intracellular channel 3                                                  | 4.92  |     | 3.25  |     | 2.30  |     |
| 1552701_a_at            | COP1        | caspase-1 dominant-negative inhibitor pseudo-ICE                                  | 2.14  |     | 3.25  |     | 2.46  |     |



| AFFYMETRIX PROBE SET ID | GENE SYMBOL | GENE TITLE                                                                               | FC#22 | I/D | FC#2  | I/D | FC#26 | I/D |
|-------------------------|-------------|------------------------------------------------------------------------------------------|-------|-----|-------|-----|-------|-----|
| 210688_s_at             | CPT1A       | carnitine palmitoyltransferase 1A (liver)                                                | 3.25  |     | 4.00  |     | 3.03  |     |
| 209833_at               | CRADD       | CASP2 and RIPK1 domain containing adaptor with death domain                              | 2.83  |     | 2.46  |     | 2.30  |     |
| 210140_at               | CST7        | cystatin F (leukocystatin)                                                               | 2.83  |     | 2.46  |     | 4.59  |     |
| 225525_at               | CTA-221G9.4 | KIAA1671 protein                                                                         | 8.00  |     | 4.59  |     | 13.00 |     |
| 201220_x_at             | CTBP2       | C-terminal binding protein 2                                                             | 4.59  |     | 4.59  |     | 8.00  |     |
| 210554_s_at             | CTBP2       | C-terminal binding protein 2                                                             | 4.00  |     | 4.00  |     | 4.92  |     |
| 210835_s_at             | CTBP2       | C-terminal binding protein 2                                                             | 4.59  |     | 4.29  |     | 6.96  |     |
| 201218_at               | CTBP2       | C-terminal binding protein 2                                                             | 6.50  |     | 4.00  |     | 4.92  |     |
| 201219_at               | CTBP2       | C-terminal binding protein 2                                                             | 6.96  |     | 5.28  |     | 6.50  |     |
| 200764_s_at             | CTNNA1      | catenin (cadherin-associated protein), alpha 1, 102kDa                                   | 6.50  |     | 5.66  |     | 5.28  |     |
| 200765_x_at             | CTNNA1      | catenin (cadherin-associated protein), alpha 1, 102kDa                                   | 5.28  |     | 5.28  |     | 6.96  |     |
| 210844_x_at             | CTNNA1      | catenin (cadherin-associated protein), alpha 1, 102kDa                                   | 7.46  |     | 6.96  |     | 8.57  |     |
| 232617_at               | CTSS        | cathepsin S                                                                              | 2.30  |     | 3.73  |     | 2.14  |     |
| 219079_at               | CYB5R4      | cytochrome b5 reductase 4                                                                | 2.00  |     | 2.64  |     | 2.14  |     |
| 212975_at               | DENND3      | DENN/MADD domain containing 3                                                            | 4.59  |     | 6.06  |     | 3.73  |     |
| 200862_at               | DHCR24      | 24-dehydrocholesterol reductase                                                          | 6.06  |     | 4.92  |     | 9.19  |     |
| 222154_s_at             | DNAPT6      | DNA polymerase-transactivated protein 6                                                  | 2.14  |     | 2.14  |     | 2.83  |     |
| 227018_at               | DPP8        | dipeptidyl-peptidase 8                                                                   | 2.46  |     | 2.14  |     | 2.83  |     |
| 215501_s_at             | DUSP10      | dual specificity phosphatase 10                                                          | 5.28  |     | 4.59  |     | 2.83  |     |
| 221563_at               | DUSP10      | dual specificity phosphatase 10                                                          | 3.48  |     | 3.03  |     | 3.73  |     |
| 209457_at               | DUSP5       | dual specificity phosphatase 5                                                           | 3.25  |     | 9.19  |     | 7.46  |     |
| 221417_x_at             | EDG8        | endothelial differentiation, sphingolipid G-protein-coupled receptor, 8                  | 8.57  |     | 6.06  |     | 6.96  |     |
| 230464_at               | EDG8        | endothelial differentiation, sphingolipid G-protein-coupled receptor, 8                  | 5.28  |     | 3.25  |     | 8.00  |     |
| 217992_s_at             | EFHD2       | EF-hand domain family, member D2                                                         | 4.29  |     | 4.59  |     | 4.92  |     |
| 222483_at               | EFHD2       | EF-hand domain family, member D2                                                         | 4.00  |     | 4.92  |     | 6.50  |     |
| 219190_s_at             | EIF2C4      | eukaryotic translation initiation factor 2C, 4                                           | 2.64  |     | 2.46  |     | 2.46  |     |
| 1554309_at              | EIF4G3      | eukaryotic translation initiation factor 4 gamma, 3                                      | 8.00  |     | 9.19  |     | 5.66  |     |
| 201935_s_at             | EIF4G3      | eukaryotic translation initiation factor 4 gamma, 3                                      | 2.00  |     | 2.00  |     | 4.59  |     |
| 201341_at               | ENC1        | ectodermal-neural cortex (with BTB-like domain)                                          | 3.25  |     | 3.73  |     | 6.96  |     |
| 227609_at               | EPST11      | epithelial stromal interaction 1 (breast)                                                | 3.25  |     | 4.00  |     | 2.00  |     |
| 216836_s_at             | ERBB2       | v-erb-b2 erythroblastic leukemia viral oncogene homolog 2                                | 3.48  |     | 3.03  |     | 4.29  |     |
| 203989_x_at             | F2R         | coagulation factor II (thrombin) receptor                                                | 6.06  |     | 2.83  |     | 3.73  |     |
| 221766_s_at             | FAM46A      | family with sequence similarity 46, member A                                             | 2.30  |     | 3.25  |     | 5.66  |     |
| 224973_at               | FAM46A      | Family with sequence similarity 46, member A                                             | 2.83  |     | 2.64  |     | 3.03  |     |
| 208092_s_at             | FAM49A      | family with sequence similarity 49, member A                                             | 8.57  |     | 8.57  |     | 6.96  |     |
| 209683_at               | FAM49A      | Family with sequence similarity 49, member A                                             | 4.59  |     | 3.73  |     | 8.57  |     |
| 203206_at               | FAM53B      | family with sequence similarity 53, member B                                             | 4.92  |     | 2.83  |     | 7.46  |     |
| 210889_s_at             | FCGR2B      | Fc fragment of IgG, low affinity IIb, receptor (CD32)                                    | 2.83  |     | 9.85  |     | 27.86 |     |
| 211395_x_at             | FCGR2C      | Fc fragment of IgG, low affinity IIc, receptor for (CD32)                                | 8.00  |     | 27.86 |     | 5.66  |     |
| 204006_s_at             | FCGR3A/B    | Fc fragment of IgG, low affinity IIIa/IIIb, receptor (CD16a/CD16b)                       | 22.63 |     | 27.86 |     | 7.46  |     |
| 204007_at               | FCGR3B      | Fc fragment of IgG, low affinity IIIb, receptor (CD16b)                                  | 11.31 |     | 9.85  |     | 6.06  |     |
| 238452_at               | FCRLM2      | Fc receptor-like and mucin-like 2                                                        | 3.73  |     | 2.30  |     | 8.00  |     |
| 204834_at               | FGL2        | fibrinogen-like 2                                                                        | 8.00  |     | 14.93 |     | 3.48  |     |
| 208438_s_at             | FGR         | Gardner-Rasheed feline sarcoma viral (v-fgr) oncogene homolog                            | 4.59  |     | 5.66  |     | 4.29  |     |
| 1555486_a_at            | FLJ14213    | hypothetical protein FLJ14213                                                            | 4.00  |     | 2.83  |     | 5.28  |     |
| 219383_at               | FLJ14213    | hypothetical protein FLJ14213                                                            | 4.00  |     | 2.14  |     | 6.06  |     |
| 227168_at               | FLJ25967    | hypothetical gene supported by AK098833                                                  | 5.66  |     | 2.64  |     | 8.00  |     |
| 236487_at               | FLJ30655    | Hypothetical protein FLJ30655                                                            | 2.83  |     | 2.14  |     | 2.64  |     |
| 225262_at               | FOSL2       | FOS-like antigen 2                                                                       | 3.48  |     | 4.92  |     | 2.30  |     |
| 206307_s_at             | FOXO1       | forkhead box D1                                                                          | 21.11 |     | 11.31 |     | 27.86 |     |
| 242586_at               | FSD1L       | Fibronectin type III and SPRY domain containing 1-like                                   | 5.28  |     | 2.64  |     | 3.03  |     |
| 200959_at               | FUS         | fusion (involved in t(12;16) in malignant liposarcoma)                                   | 2.30  |     | 2.46  |     | 2.00  |     |
| 209304_x_at             | GADD45B     | growth arrest and DNA-damage-inducible, beta                                             | 2.14  |     | 3.73  |     | 2.64  |     |
| 231578_at               | GBP1        | guanylate binding protein 1, interferon-inducible, 67kDa                                 | 2.83  |     | 2.46  |     | 2.46  |     |
| 229625_at               | GBP5        | Guanylate binding protein 5                                                              | 3.03  |     | 3.48  |     | 2.64  |     |
| 205505_at               | GCNT1       | glucosaminyl (N-acetyl) transferase 1, core 2 (beta-1,6-N-acetylglucosaminyltransferase) | 3.48  |     | 2.14  |     | 2.64  |     |
| 219821_s_at             | GFOD1       | glucose-fructose oxidoreductase domain containing 1                                      | 3.48  |     | 2.46  |     | 17.15 |     |
| 200648_s_at             | GLUL        | glutamate-ammonia ligase (glutamine synthetase)                                          | 9.85  |     | 13.00 |     | 2.83  |     |
| 215001_s_at             | GLUL        | glutamate-ammonia ligase (glutamine synthetase)                                          | 4.29  |     | 4.59  |     | 3.25  |     |
| 217202_s_at             | GLUL        | glutamate-ammonia ligase (glutamine synthetase)                                          | 8.57  |     | 9.85  |     | 2.30  |     |
| 235139_at               | GNGT2       | guanine nucleotide binding protein (G protein), gamma transducing activity polypeptide 2 | 4.00  |     | 3.48  |     | 4.00  |     |
| 238002_at               | GOLPH4      | golgi phosphoprotein 4                                                                   | 6.50  |     | 6.06  |     | 5.28  |     |

| AFFYMETRIX PROBE SET ID | GENE SYMBOL      | GENE TITLE                                                                               | FC#22 | I/D | FC#2  | I/D | FC#26 | I/D |
|-------------------------|------------------|------------------------------------------------------------------------------------------|-------|-----|-------|-----|-------|-----|
| 211977_at               | GPR107           | G protein-coupled receptor 107                                                           | 2.00  |     | 2.64  |     | 3.25  |     |
| 206582_s_at             | GPR56            | G protein-coupled receptor 56                                                            | 19.70 |     | 13.93 |     | 21.11 |     |
| 212070_at               | GPR56            | G protein-coupled receptor 56                                                            | 7.46  |     | 5.28  |     | 19.70 |     |
| 210164_at               | GZMB             | granzyme B (granzyme 2, cytotoxic T-lymphocyte-associated serine esterase 1)             | 4.92  |     | 3.48  |     | 9.85  |     |
| 210321_at               | GZMH             | granzyme H (cathepsin G-like 2, protein h-CCPX)                                          | 6.06  |     | 5.28  |     | 9.19  |     |
| 1554285_at              | HAVCR2           | hepatitis A virus cellular receptor 2                                                    | 7.46  |     | 8.00  |     | 6.50  |     |
| 1555628_a_at            | HAVCR2           | hepatitis A virus cellular receptor 2                                                    | 6.06  |     | 4.59  |     | 5.66  |     |
| 235458_at               | HAVCR2           | hepatitis A virus cellular receptor 2                                                    | 5.28  |     | 4.29  |     | 8.57  |     |
| 209524_at               | HDGFRP3          | hepatoma-derived growth factor, related protein 3                                        | 3.73  |     | 3.48  |     | 6.50  |     |
| 209526_s_at             | HDGFRP3          | hepatoma-derived growth factor, related protein 3                                        | 3.48  |     | 3.48  |     | 6.06  |     |
| 216693_x_at             | HDGFRP3          | hepatoma-derived growth factor, related protein 3                                        | 3.48  |     | 3.48  |     | 4.92  |     |
| 228266_s_at             | HDGFRP3          | hepatoma-derived growth factor, related protein 3                                        | 2.30  |     | 3.48  |     | 3.03  |     |
| 212822_at               | HEG1             | HEG homolog 1 (zebrafish)                                                                | 2.14  |     | 2.00  |     | 5.28  |     |
| 239988_at               | HERC6            | Hect domain and RLD 6                                                                    | 2.46  |     | 2.14  |     | 2.00  |     |
| 202814_s_at             | HEXIM1           | hexamethylene bis-acetamide inducible 1                                                  | 2.30  |     | 2.00  |     | 2.64  |     |
| 225116_at               | HIPK2            | Homeodomain interacting protein kinase 2                                                 | 2.14  |     | 2.00  |     | 3.48  |     |
| 214290_s_at             | HIST2H2AA        | histone 2, H2aa                                                                          | 4.29  |     | 5.66  |     | 2.83  |     |
| 218280_x_at             | HIST2H2AA        | histone 2, H2aa                                                                          | 4.00  |     | 5.66  |     | 3.48  |     |
| 211991_s_at             | HLA-DPA1         | major histocompatibility complex, class II, DP alpha 1                                   | 5.28  |     | 8.00  |     | 2.14  |     |
| 213831_at               | HLA-DQA1         | major histocompatibility complex, class II, DQ alpha 1                                   | 51.98 |     | 84.45 |     | 17.15 |     |
| 209480_at               | HLA-DQB1         | major histocompatibility complex, class II, DQ beta 1                                    | 24.25 |     | 34.30 |     | 4.92  |     |
| 211654_x_at             | HLA-DQB1         | major histocompatibility complex, class II, DQ beta 1                                    | 8.57  |     | 16.00 |     | 2.46  |     |
| 212999_x_at             | HLA-DQB1         | major histocompatibility complex, class II, DQ beta 1                                    | 11.31 |     | 27.86 |     | 4.92  |     |
| 204670_x_at             | HLA-DRB1         | major histocompatibility complex, class II, DR beta 1                                    | 3.73  |     | 4.59  |     | 2.00  |     |
| 236203_at               | HLA-DRB1         | Major histocompatibility complex, class II, DR beta 1                                    | 18.38 |     | 48.50 |     | 11.31 |     |
| 238900_at               | HLA-DRB1         | Major histocompatibility complex, class II, DR beta 1                                    | 24.25 |     | 97.01 |     | 7.46  |     |
| 211597_s_at             | HOP              | homeodomain-only protein /// homeodomain-only protein                                    | 2.00  |     | 2.14  |     | 3.03  |     |
| 206194_at               | HOXC4            | homeobox C4                                                                              | 5.28  |     | 4.59  |     | 5.66  |     |
| 209581_at               | HRASLS3          | HRAS-like suppressor 3                                                                   | 6.50  |     | 4.29  |     | 8.00  |     |
| 201193_at               | IDH1             | isocitrate dehydrogenase 1 (NADP+), soluble                                              | 2.00  |     | 2.64  |     | 2.64  |     |
| 210046_s_at             | IDH2             | isocitrate dehydrogenase 2 (NADP+), mitochondrial                                        | 2.46  |     | 2.14  |     | 2.46  |     |
| 202438_x_at             | IDS              | iduronate 2-sulfatase (Hunter syndrome)                                                  | 2.30  |     | 2.14  |     | 2.64  |     |
| 206342_x_at             | IDS              | iduronate 2-sulfatase (Hunter syndrome)                                                  | 2.83  |     | 3.25  |     | 3.03  |     |
| 217502_at               | IFIT2            | interferon-induced protein with tetratricopeptide repeats 2                              | 3.25  |     | 9.19  |     | 2.00  |     |
| 226757_at               | IFIT2            | interferon-induced protein with tetratricopeptide repeats 2                              | 2.83  |     | 4.92  |     | 3.73  |     |
| 204747_at               | IFIT3            | interferon-induced protein with tetratricopeptide repeats 3                              | 4.29  |     | 4.59  |     | 5.66  |     |
| 210354_at               | IFNG             | interferon, gamma                                                                        | 45.25 |     | 45.25 |     | 78.79 |     |
| 201393_s_at             | IGF2R            | insulin-like growth factor 2 receptor                                                    | 2.14  |     | 2.14  |     | 2.64  |     |
| 244261_at               | IL28RA           | interleukin 28 receptor, alpha (interferon, lambda receptor)                             | 3.03  |     | 2.30  |     | 5.66  |     |
| 221185_s_at             | IQCG             | IQ motif containing G                                                                    | 6.96  |     | 3.48  |     | 4.29  |     |
| 204562_at               | IRF4             | interferon regulatory factor 4                                                           | 3.48  |     | 2.46  |     | 4.92  |     |
| 232352_at               | ISL2             | ISL2 transcription factor, LIM/homeodomain, (islet-2)                                    | 16.00 |     | 13.93 |     | 14.93 |     |
| 210184_at               | ITGAX            | integrin, alpha X (complement component 3 receptor 4 subunit)                            | 6.06  |     | 9.85  |     | 6.96  |     |
| 238600_at               | JAKMIP1          | janus kinase and microtubule interacting protein 1                                       | 3.48  |     | 2.00  |     | 3.25  |     |
| 201464_x_at             | JUN              | v-jun sarcoma virus 17 oncogene homolog (avian)                                          | 3.48  |     | 8.57  |     | 2.46  |     |
| 201466_s_at             | JUN              | v-jun sarcoma virus 17 oncogene homolog (avian)                                          | 3.48  |     | 14.93 |     | 2.83  |     |
| 227265_at               | KIAA1505         | KIAA1505 protein                                                                         | 6.06  |     | 6.96  |     | 3.25  |     |
| 202393_s_at             | KLF10            | Kruppel-like factor 10                                                                   | 2.46  |     | 9.19  |     | 2.83  |     |
| 207723_s_at             | KLRC3            | killer cell lectin-like receptor subfamily C, member 3                                   | 5.28  |     | 3.25  |     | 8.57  |     |
| 207795_s_at             | KLRD1            | killer cell lectin-like receptor subfamily D, member 1                                   | 4.00  |     | 2.46  |     | 6.06  |     |
| 210606_x_at             | KLRD1            | killer cell lectin-like receptor subfamily D, member 1                                   | 3.73  |     | 2.14  |     | 6.06  |     |
| 223836_at               | KSP37            | Ksp37 protein                                                                            | 8.00  |     | 7.46  |     | 12.13 |     |
| 206486_at               | LAG3             | lymphocyte-activation gene 3                                                             | 3.48  |     | 2.30  |     | 4.00  |     |
| 221581_s_at             | LAT2             | linker for activation of T cells family, member 2                                        | 6.96  |     | 6.50  |     | 6.50  |     |
| 202068_s_at             | LDLR             | low density lipoprotein receptor (familial hypercholesterolemia)                         | 4.59  |     | 4.00  |     | 5.66  |     |
| 201105_at               | LGALS1           | lectin, galactoside-binding, soluble, 1 (galectin 1)                                     | 4.29  |     | 4.59  |     | 3.48  |     |
| 208949_s_at             | LGALS3 /// GALIG | lectin, galactoside-binding, soluble, 3 (galectin 3) / galectin-3 internal gene          | 4.00  |     | 8.00  |     | 2.64  |     |
| 211336_x_at             | LILRB1           | leukocyte immunoglobulin-like receptor, subfamily B (with TM and ITIM domains), member 1 | 3.48  |     | 8.00  |     | 3.03  |     |
| 207104_x_at             | LILRB1           | leukocyte immunoglobulin-like receptor, subfamily B (with TM and ITIM domains), member 1 | 5.28  |     | 14.93 |     | 4.29  |     |
| 229937_x_at             | LILRB1           | Leukocyte immunoglobulin-like receptor, subfamily B (with TM and ITIM domains), member 1 | 9.19  |     | 14.93 |     | 9.19  |     |
| 209205_s_at             | LMO4             | LIM domain only 4                                                                        | 2.14  |     | 2.14  |     | 2.00  |     |
| 236717_at               | LOC165186        | similar to RIKEN cDNA 4632412N22 gene                                                    | 6.06  |     | 4.92  |     | 13.00 |     |

| AFFYMETRIX PROBE SET ID | GENE SYMBOL | GENE TITLE                                                       | FC#22  | I/D | FC#2  | I/D | FC#26  | I/D |
|-------------------------|-------------|------------------------------------------------------------------|--------|-----|-------|-----|--------|-----|
| 1557411_s_at            | LOC203427   | similar to solute carrier family 25 , member 16                  | 2.46   |     | 2.14  |     | 2.30   |     |
| 230727_at               | LOC284106   | hypothetical protein LOC284106                                   | 3.73   |     | 2.46  |     | 3.25   |     |
| 227478_at               | LOC284262   | hypothetical protein LOC284262                                   | 8.00   |     | 4.29  |     | 12.13  |     |
| 230179_at               | LOC285812   | hypothetical protein LOC285812                                   | 4.59   |     | 2.83  |     | 11.31  |     |
| 230272_at               | LOC645323   | Hypothetical protein LOC645323                                   | 147.03 |     | 78.79 |     | 388.02 |     |
| 238850_at               | LOC645323   | Hypothetical protein LOC645323                                   | 39.40  |     | 8.57  |     | 90.51  |     |
| 239494_at               | LOC646725   | hypothetical protein LOC646725                                   | 3.73   |     | 11.31 |     | 2.83   |     |
| 225834_at               | LOC652689   | hypothetical protein LOC652689                                   | 3.25   |     | 3.73  |     | 2.64   |     |
| 229067_at               | LOC653464   | Similar to SLIT-ROBO Rho GTPase-activating protein 2 (srGAP2)    | 2.46   |     | 2.83  |     | 2.30   |     |
| 202625_at               | LYN         | v-yes-1 Yamaguchi sarcoma viral related oncogene homolog         | 5.66   |     | 8.00  |     | 6.06   |     |
| 202626_s_at             | LYN         | v-yes-1 Yamaguchi sarcoma viral related oncogene homolog         | 4.92   |     | 8.00  |     | 10.56  |     |
| 210754_s_at             | LYN         | v-yes-1 Yamaguchi sarcoma viral related oncogene homolog         | 4.92   |     | 7.46  |     | 9.19   |     |
| 203518_at               | LYST        | lysosomal trafficking regulator                                  | 2.64   |     | 2.00  |     | 4.59   |     |
| 215415_s_at             | LYST        | lysosomal trafficking regulator                                  | 3.73   |     | 3.73  |     | 2.00   |     |
| 36711_at                | MAFF        | v-maf musculoaponeurotic fibrosarcoma oncogene homolog F (avian) | 2.64   |     | 4.29  |     | 2.30   |     |
| 208116_s_at             | MAN1A1      | mannosidase, alpha, class 1A, member 1                           | 4.59   |     | 2.46  |     | 3.03   |     |
| 225408_at               | MBP         | myelin basic protein                                             | 2.83   |     | 2.14  |     | 2.30   |     |
| 230110_at               | MCOLN2      | mucolipin 2                                                      | 3.03   |     | 2.30  |     | 3.03   |     |
| 220603_s_at             | MCTP2       | multiple C2 domains, transmembrane 2                             | 2.46   |     | 2.14  |     | 2.30   |     |
| 209200_at               | MEF2C       | MADS box transcription enhancer factor 2, polypeptide A          | 3.03   |     | 2.64  |     | 3.25   |     |
| 212830_at               | MEGF9       | multiple EGF-like-domains 9                                      | 2.30   |     | 3.73  |     | 2.64   |     |
| 225955_at               | METRNL      | meteorin, glial cell differentiation regulator-like              | 6.96   |     | 6.06  |     | 8.00   |     |
| 228606_at               | MGC33212    | hypothetical protein MGC33212                                    | 2.30   |     | 2.14  |     | 2.64   |     |
| 224917_at               | MIRN21      | microRNA 21                                                      | 4.00   |     | 5.28  |     | 2.46   |     |
| 213395_at               | MLC1        | megalencephalic leukoencephalopathy with subcortical cysts 1     | 4.29   |     | 5.66  |     | 10.56  |     |
| 209928_s_at             | MSC         | musculin (activated B-cell factor-1)                             | 6.96   |     | 3.25  |     | 4.29   |     |
| 201761_at               | MTHFD2      | Methylenetetrahydrofolate dehydrogenase (NADP+ dependent) 2      | 2.46   |     | 3.03  |     | 2.14   |     |
| 212509_s_at             | MXRA7       | matrix-remodelling associated 7                                  | 3.03   |     | 4.29  |     | 4.59   |     |
| 227326_at               | MXRA7       | matrix-remodelling associated 7                                  | 4.29   |     | 5.28  |     | 6.50   |     |
| 213733_at               | MYO1F       | myosin IF                                                        | 2.30   |     | 2.64  |     | 2.46   |     |
| 203216_s_at             | MYO6        | myosin VI                                                        | 6.06   |     | 2.64  |     | 8.57   |     |
| 210480_s_at             | MYO6        | myosin VI                                                        | 5.28   |     | 2.64  |     | 9.19   |     |
| 228062_at               | NAP1L5      | nucleosome assembly protein 1-like 5                             | 2.83   |     | 2.46  |     | 2.46   |     |
| 228063_s_at             | NAP1L5      | nucleosome assembly protein 1-like 5                             | 2.64   |     | 2.64  |     | 3.03   |     |
| 207860_at               | NCR1        | natural cytotoxicity triggering receptor 1                       | 7.46   |     | 5.66  |     | 5.28   |     |
| 217095_x_at             | NCR1        | natural cytotoxicity triggering receptor 1                       | 17.15  |     | 24.25 |     | 21.11  |     |
| 203574_at               | NFIL3       | nuclear factor, interleukin 3 regulated                          | 9.19   |     | 13.93 |     | 13.93  |     |
| 213915_at               | NKG7        | natural killer cell group 7 sequence                             | 2.46   |     | 2.30  |     | 2.83   |     |
| 210756_s_at             | NOTCH2      | Notch homolog 2 (Drosophila)                                     | 2.83   |     | 4.00  |     | 2.64   |     |
| 204589_at               | NUAK1       | NUAK family, SNF1-like kinase, 1                                 | 45.25  |     | 36.76 |     | 36.76  |     |
| 205660_at               | OASL        | 2'-5'-oligoadenylate synthetase-like                             | 3.73   |     | 3.25  |     | 5.28   |     |
| 210797_s_at             | OASL        | 2'-5'-oligoadenylate synthetase-like                             | 3.48   |     | 2.83  |     | 3.25   |     |
| 223464_at               | OSBPL5      | oxysterol binding protein-like 5                                 | 3.48   |     | 2.64  |     | 3.48   |     |
| 200897_s_at             | PALLD       | palladin, cytoskeletal associated protein                        | 5.66   |     | 4.59  |     | 14.93  |     |
| 200906_s_at             | PALLD       | palladin, cytoskeletal associated protein                        | 5.28   |     | 4.00  |     | 4.00   |     |
| 200907_s_at             | PALLD       | palladin, cytoskeletal associated protein                        | 8.57   |     | 4.59  |     | 21.11  |     |
| 227204_at               | PARD6G      | par-6 partitioning defective 6 homolog gamma (C. elegans)        | 17.15  |     | 13.93 |     | 19.70  |     |
| 243296_at               | PBEF1       | Pre-B-cell colony enhancing factor 1                             | 2.14   |     | 6.50  |     | 3.48   |     |
| 218676_s_at             | PCTP        | phosphatidylcholine transfer protein                             | 2.46   |     | 2.46  |     | 3.48   |     |
| 204735_at               | PDE4A       | phosphodiesterase 4A, cAMP-specific                              | 3.73   |     | 4.00  |     | 6.50   |     |
| 219304_s_at             | PDGFD       | platelet derived growth factor D                                 | 3.73   |     | 3.48  |     | 13.00  |     |
| 222860_s_at             | PDGFD       | platelet derived growth factor D                                 | 4.92   |     | 2.83  |     | 6.50   |     |
| 202273_at               | PDGFRB      | platelet-derived growth factor receptor, beta polypeptide        | 4.29   |     | 3.25  |     | 13.00  |     |
| 208690_s_at             | PDLIM1      | PDZ and LIM domain 1 (elfin)                                     | 9.19   |     | 4.59  |     | 14.93  |     |
| 200788_s_at             | PEA15       | phosphoprotein enriched in astrocytes 15                         | 2.30   |     | 5.28  |     | 2.83   |     |
| 1554508_at              | PIK3AP1     | phosphoinositide-3-kinase adaptor protein 1                      | 6.06   |     | 5.66  |     | 3.03   |     |
| 226459_at               | PIK3AP1     | phosphoinositide-3-kinase adaptor protein 1                      | 4.59   |     | 4.00  |     | 7.46   |     |
| 204613_at               | PLCG2       | phospholipase C, gamma 2 (phosphatidylinositol-specific)         | 5.28   |     | 2.46  |     | 6.96   |     |
| 203470_s_at             | PLEK        | pleckstrin                                                       | 2.64   |     | 4.92  |     | 4.29   |     |
| 203471_s_at             | PLEK        | pleckstrin                                                       | 3.03   |     | 3.03  |     | 4.59   |     |
| 204436_at               | PLEKHQ1     | pleckstrin homology domain containing, family Q member 1         | 2.46   |     | 2.30  |     | 4.00   |     |
| 202446_s_at             | PLSCR1      | phospholipid scramblase 1                                        | 2.00   |     | 3.03  |     | 2.00   |     |

| AFFYMETRIX PROBE SET ID | GENE SYMBOL | GENE TITLE                                                                            | FC#22 | I/D | FC#2  | I/D | FC#26 | I/D |
|-------------------------|-------------|---------------------------------------------------------------------------------------|-------|-----|-------|-----|-------|-----|
| 204286_s_at             | PMAIP1      | phorbol-12-myristate-13-acetate-induced protein 1                                     | 2.64  |     | 6.50  |     | 3.03  |     |
| 218009_s_at             | PRC1        | protein regulator of cytokinesis 1                                                    | 3.03  |     | 4.00  |     | 4.59  |     |
| 217192_s_at             | PRDM1       | PR domain containing 1, with ZNF domain                                               | 2.30  |     | 2.30  |     | 2.00  |     |
| 201858_s_at             | PRG1        | proteoglycan 1, secretory granule                                                     | 2.00  |     | 2.00  |     | 3.03  |     |
| 202458_at               | PRSS23      | protease, serine, 23                                                                  | 19.70 |     | 14.93 |     | 24.25 |     |
| 226279_at               | PRSS23      | protease, serine, 23                                                                  | 24.25 |     | 19.70 |     | 32.00 |     |
| 202006_at               | PTPN12      | protein tyrosine phosphatase, non-receptor type 12                                    | 3.25  |     | 2.30  |     | 4.59  |     |
| 216915_s_at             | PTPN12      | protein tyrosine phosphatase, non-receptor type 12                                    | 3.48  |     | 2.83  |     | 3.25  |     |
| 203555_at               | PTPN18      | protein tyrosine phosphatase, non-receptor type 18                                    | 3.25  |     | 3.25  |     | 2.14  |     |
| 213521_at               | PTPN18      | protein tyrosine phosphatase, non-receptor type 18                                    | 2.14  |     | 2.30  |     | 2.00  |     |
| 210879_s_at             | RAB11FIP5   | RAB11 family interacting protein 5 (class I)                                          | 3.48  |     | 3.25  |     | 4.92  |     |
| 209514_s_at             | RAB27A      | RAB27A, member RAS oncogene family                                                    | 3.73  |     | 3.03  |     | 2.14  |     |
| 210951_x_at             | RAB27A      | RAB27A, member RAS oncogene family                                                    | 3.73  |     | 3.03  |     | 2.30  |     |
| 228113_at               | RAB37       | RAB37, member RAS oncogene family                                                     | 2.30  |     | 2.30  |     | 3.48  |     |
| 230405_at               | RAD50       | RAD50 homolog (S. cerevisiae)                                                         | 2.46  |     | 2.00  |     | 4.59  |     |
| 209050_s_at             | RALGDS      | ral guanine nucleotide dissociation stimulator                                        | 2.83  |     | 2.46  |     | 4.29  |     |
| 209051_s_at             | RALGDS      | ral guanine nucleotide dissociation stimulator                                        | 3.25  |     | 2.83  |     | 2.83  |     |
| 221830_at               | RAP2A       | RAP2A, member of RAS oncogene family                                                  | 4.00  |     | 2.64  |     | 8.57  |     |
| 225585_at               | RAP2A       | RAP2A, member of RAS oncogene family                                                  | 6.96  |     | 4.00  |     | 8.57  |     |
| 214487_s_at             | RAP2A       | RAP2A, member of RAS oncogene family                                                  | 3.73  |     | 3.25  |     | 5.28  |     |
| 225738_at               | RAPGEF1     | Rap guanine nucleotide exchange factor (GEF) 1                                        | 4.92  |     | 4.92  |     | 3.73  |     |
| 226389_s_at             | RAPGEF1     | Rap guanine nucleotide exchange factor (GEF) 1                                        | 4.00  |     | 3.73  |     | 5.28  |     |
| 204346_s_at             | RASSF1      | Ras association (RalGDS/AF-6) domain family 1                                         | 3.03  |     | 2.83  |     | 3.03  |     |
| 226436_at               | RASSF4      | Ras association (RalGDS/AF-6) domain family 4                                         | 6.96  |     | 9.85  |     | 10.56 |     |
| 49306_at                | RASSF4      | Ras association (RalGDS/AF-6) domain family 4                                         | 5.66  |     | 6.96  |     | 14.93 |     |
| 1554602_at              | RBM8A       | RNA binding motif protein 8A                                                          | 3.25  |     | 5.28  |     | 2.64  |     |
| 204759_at               | RCBTB2      | regulator of chromosome condensation (RCC1) and BTB (POZ) domain containing protein 2 | 2.64  |     | 2.00  |     | 2.83  |     |
| 226021_at               | RDH10       | retinol dehydrogenase 10 (all-trans)                                                  | 3.03  |     | 2.83  |     | 3.25  |     |
| 202388_at               | RGS2        | regulator of G-protein signalling 2, 24kDa                                            | 3.48  |     | 5.28  |     | 3.73  |     |
| 219202_at               | RHBDP2      | rhomboid 5 homolog 2 (Drosophila)                                                     | 2.46  |     | 2.83  |     | 2.64  |     |
| 212099_at               | RHOB        | ras homolog gene family, member B                                                     | 21.11 |     | 48.50 |     | 8.57  |     |
| 212120_at               | RHOQ        | ras homolog gene family, member Q                                                     | 2.00  |     | 3.03  |     | 2.00  |     |
| 209545_s_at             | RIPK2       | receptor-interacting serine-threonine kinase 2                                        | 2.46  |     | 4.00  |     | 3.25  |     |
| 1556874_a_at            | RKHD2       | ring finger and KH domain containing 2                                                | 4.00  |     | 8.57  |     | 3.73  |     |
| 223592_s_at             | RNF135      | ring finger protein 135                                                               | 2.46  |     | 4.59  |     | 2.00  |     |
| 221430_s_at             | RNF146      | ring finger protein 146 /// ring finger protein 146                                   | 2.14  |     | 2.14  |     | 2.83  |     |
| 204900_x_at             | SAP30       | Sin3A-associated protein, 30kDa                                                       | 6.50  |     | 5.66  |     | 3.48  |     |
| 213435_at               | SATB2       | SATB family member 2                                                                  | 7.46  |     | 3.73  |     | 32.00 |     |
| 204361_s_at             | SCAP2       | src family associated phosphoprotein 2                                                | 3.03  |     | 3.25  |     | 3.25  |     |
| 204362_at               | SCAP2       | src family associated phosphoprotein 2                                                | 2.83  |     | 2.83  |     | 4.92  |     |
| 216899_s_at             | SCAP2       | src family associated phosphoprotein 2                                                | 4.00  |     | 4.29  |     | 3.48  |     |
| 213572_s_at             | SERPINB1    | serpin peptidase inhibitor, clade B (ovalbumin), member 1                             | 2.14  |     | 2.14  |     | 2.14  |     |
| 219382_at               | SERTAD3     | SERTA domain containing 3                                                             | 4.59  |     | 4.29  |     | 2.00  |     |
| 205933_at               | SETBP1      | SET binding protein 1                                                                 | 5.66  |     | 2.64  |     | 13.00 |     |
| 1553176_at              | SH2D1B      | SH2 domain containing 1B                                                              | 12.13 |     | 6.06  |     | 12.13 |     |
| 1553177_at              | SH2D1B      | SH2 domain containing 1B                                                              | 13.00 |     | 5.66  |     | 19.70 |     |
| 207351_s_at             | SH2D2A      | SH2 domain protein 2A                                                                 | 2.30  |     | 2.00  |     | 3.25  |     |
| 209370_s_at             | SH3BP2      | SH3-domain binding protein 2                                                          | 2.83  |     | 2.64  |     | 2.30  |     |
| 211250_s_at             | SH3BP2      | SH3-domain binding protein 2                                                          | 2.64  |     | 4.92  |     | 3.48  |     |
| 222838_at               | SLAMF7      | SLAM family member 7                                                                  | 2.83  |     | 2.00  |     | 4.29  |     |
| 219386_s_at             | SLAMF8      | SLAM family member 8                                                                  | 3.48  |     | 7.46  |     | 4.00  |     |
| 225043_at               | SLC15A4     | solute carrier family 15, member 4                                                    | 2.46  |     | 2.30  |     | 3.25  |     |
| 225057_at               | SLC15A4     | Solute carrier family 15, member 4                                                    | 3.03  |     | 2.14  |     | 2.83  |     |
| 209610_s_at             | SLC1A4      | solute carrier family 1 (glutamate/neutral amino acid transporter), member 4          | 16.00 |     | 5.66  |     | 34.30 |     |
| 212810_s_at             | SLC1A4      | solute carrier family 1 (glutamate/neutral amino acid transporter), member 4          | 8.00  |     | 8.57  |     | 32.00 |     |
| 212811_x_at             | SLC1A4      | solute carrier family 1 (glutamate/neutral amino acid transporter), member 4          | 7.46  |     | 4.59  |     | 18.38 |     |
| 235875_at               | SLC1A4      | Solute carrier family 1 (glutamate/neutral amino acid transporter), member 4          | 9.19  |     | 4.29  |     | 32.00 |     |
| 244377_at               | SLC1A4      | Solute carrier family 1 (glutamate/neutral amino acid transporter), member 4          | 8.00  |     | 6.06  |     | 9.19  |     |
| 243623_at               | SLC1A7      | solute carrier family 1 (glutamate transporter), member 7                             | 9.19  |     | 12.13 |     | 11.31 |     |
| 222217_s_at             | SLC27A3     | solute carrier family 27 (fatty acid transporter), member 3                           | 2.64  |     | 3.73  |     | 2.83  |     |
| 216236_s_at             | SLC2A3      | solute carrier family 2 (facilitated glucose transporter), member 3                   | 3.25  |     | 5.28  |     | 2.30  |     |
| 209921_at               | SLC7A11     | solute carrier family 7, (cationic amino acid transporter, y+ system) member 11       | 17.15 |     | 12.13 |     | 13.00 |     |

| AFFYMETRIX PROBE SET ID | GENE SYMBOL | GENE TITLE                                                         | FC#22 | I/D | FC#2   | I/D | FC#26  | I/D |
|-------------------------|-------------|--------------------------------------------------------------------|-------|-----|--------|-----|--------|-----|
| 222071_s_at             | SLCO4C1     | solute carrier organic anion transporter family, member 4C1        | 6.06  |     | 2.64   |     | 8.00   |     |
| 237246_at               | SMC4L1      | SMC4 structural maintenance of chromosomes 4-like 1 (yeast)        | 2.64  |     | 4.00   |     | 3.73   |     |
| 223340_at               | SPG3A       | spastic paraplegia 3A (autosomal dominant)                         | 3.48  |     | 3.73   |     | 5.28   |     |
| 227649_s_at             | SRGAP2      | SLIT-ROBO Rho GTPase activating protein 2                          | 3.03  |     | 3.48   |     | 3.25   |     |
| 223635_s_at             | SSBP3       | single stranded DNA binding protein 3                              | 2.46  |     | 4.00   |     | 2.46   |     |
| 223065_s_at             | STARD3NL    | STARD3 N-terminal like                                             | 3.03  |     | 2.14   |     | 4.00   |     |
| 226390_at               | STARD4      | START domain containing 4, sterol regulated                        | 2.64  |     | 2.83   |     | 5.28   |     |
| 235670_at               | STX11       | Syntaxin 11                                                        | 6.50  |     | 6.96   |     | 4.00   |     |
| 226264_at               | SUSD1       | sushi domain containing 1                                          | 3.73  |     | 3.25   |     | 3.48   |     |
| 209197_at               | SYT11       | synaptotagmin XI                                                   | 4.92  |     | 2.64   |     | 8.57   |     |
| 209198_s_at             | SYT11       | synaptotagmin XI                                                   | 5.28  |     | 2.64   |     | 7.46   |     |
| 232677_at               | SYT11       | Synaptotagmin XI                                                   | 3.73  |     | 8.00   |     | 11.31  |     |
| 1554415_at              | TAF5L       | TAF5-like RNA polymerase II, p300                                  | 2.00  |     | 3.03   |     | 4.92   |     |
| 220684_at               | TBX21       | T-box 21                                                           | 4.29  |     | 3.25   |     | 9.19   |     |
| 225798_at               | tcag7.981   | juxtaposed with another zinc finger gene 1                         | 4.00  |     | 3.25   |     | 3.48   |     |
| 1557945_at              | TCTE3       | T-complex-associated-testis-expressed 3                            | 3.03  |     | 3.73   |     | 3.48   |     |
| 203589_s_at             | TFDP2       | transcription factor Dp-2 (E2F dimerization partner 2)             | 3.25  |     | 2.64   |     | 3.48   |     |
| 206715_at               | TFEC        | transcription factor EC                                            | 17.15 |     | 45.25  |     | 2.64   |     |
| 202085_at               | TJP2        | tight junction protein 2 (zona occludens 2)                        | 6.50  |     | 5.66   |     | 11.31  |     |
| 219892_at               | TM6SF1      | transmembrane 6 superfamily member 1                               | 4.00  |     | 6.50   |     | 6.50   |     |
| 1569003_at              | TMEM49      | transmembrane protein 49                                           | 4.59  |     | 8.00   |     | 2.83   |     |
| 203508_at               | TNFRSF1B    | tumor necrosis factor receptor superfamily, member 1B              | 2.64  |     | 4.00   |     | 4.00   |     |
| 207536_s_at             | TNFRSF9     | tumor necrosis factor receptor superfamily, member 9               | 9.85  |     | 4.00   |     | 17.15  |     |
| 217853_at               | TNS3        | tensin 3                                                           | 4.59  |     | 10.56  |     | 16.00  |     |
| 204529_s_at             | TOX         | thymus high mobility group box protein TOX                         | 6.50  |     | 3.48   |     | 9.85   |     |
| 204530_s_at             | TOX         | thymus high mobility group box protein TOX                         | 7.46  |     | 3.25   |     | 6.06   |     |
| 224836_at               | TP53INP2    | tumor protein p53 inducible nuclear protein 2                      | 5.66  |     | 7.46   |     | 6.50   |     |
| 223131_s_at             | TRIM8       | tripartite motif-containing 8                                      | 3.48  |     | 2.83   |     | 2.64   |     |
| 228438_at               | TRPA1       | Transient receptor potential cation channel, subfamily A, member 1 | 3.25  |     | 2.30   |     | 6.96   |     |
| 223392_s_at             | TSHZ3       | teashirt family zinc finger 3                                      | 2.83  |     | 4.00   |     | 6.06   |     |
| 227233_at               | TSPAN2      | tetraspanin 2                                                      | 5.28  |     | 2.83   |     | 2.64   |     |
| 227236_at               | TSPAN2      | tetraspanin 2                                                      | 4.59  |     | 3.48   |     | 2.00   |     |
| 220384_at               | TXNDC3      | thioredoxin domain containing 3 (spermatzoa)                       | 17.15 |     | 9.85   |     | 29.86  |     |
| 225787_at               | UBE2F       | ubiquitin-conjugating enzyme E2F (putative)                        | 2.64  |     | 3.03   |     | 2.46   |     |
| 231948_s_at             | UBE2F       | ubiquitin-conjugating enzyme E2F (putative)                        | 2.30  |     | 2.83   |     | 2.00   |     |
| 1552678_a_at            | USP28       | ubiquitin specific peptidase 28                                    | 4.00  |     | 2.14   |     | 2.83   |     |
| 200931_s_at             | VCL         | vinculin                                                           | 2.46  |     | 2.00   |     | 3.25   |     |
| 227899_at               | VIT         | vitrin                                                             | 13.00 |     | 6.50   |     | 16.00  |     |
| 205126_at               | VRK2        | vaccinia related kinase 2                                          | 2.30  |     | 2.64   |     | 2.30   |     |
| 200629_at               | WARS        | tryptophanyl-tRNA synthetase                                       | 5.66  |     | 12.13  |     | 2.64   |     |
| 242390_at               | WDFY1       | WD repeat and FYVE domain containing 1                             | 2.14  |     | 3.25   |     | 4.29   |     |
| 234157_at               | WDFY1       | WD repeat and FYVE domain containing 1                             | 2.00  |     | 3.03   |     | 3.48   |     |
| 218055_s_at             | WDR41       | WD repeat domain 41                                                | 3.03  |     | 2.00   |     | 5.28   |     |
| 222503_s_at             | WDR41       | WD repeat domain 41                                                | 3.48  |     | 2.30   |     | 3.48   |     |
| 243087_at               | WDR63       | WD repeat domain 63                                                | 9.85  |     | 3.25   |     | 27.86  |     |
| 203827_at               | WIPI1       | WD repeat domain, phosphoinositide interacting 1                   | 3.73  |     | 3.03   |     | 3.03   |     |
| 213836_s_at             | WIPI1       | WD repeat domain, phosphoinositide interacting 1                   | 3.73  |     | 2.46   |     | 2.64   |     |
| 201760_s_at             | WSB2        | WD repeat and SOCS box-containing 2                                | 2.00  |     | 2.46   |     | 2.83   |     |
| 225665_at               | ZAK         | sterile alpha motif and leucine zipper containing kinase AZK       | 2.46  |     | 3.73   |     | 2.14   |     |
| 242020_s_at             | ZBP1        | Z-DNA binding protein 1                                            | 3.73  |     | 4.29   |     | 2.30   |     |
| 230846_at               | ZBTB25      | Zinc finger and BTB domain containing 25                           | 8.00  |     | 3.25   |     | 8.57   |     |
| 1557797_a_at            | ZFHX1B      | Zinc finger homeobox 1b                                            | 2.64  |     | 2.00   |     | 6.96   |     |
| 203603_s_at             | ZFHX1B      | zinc finger homeobox 1b                                            | 8.57  |     | 8.00   |     | 7.46   |     |
| 233031_at               | ZFHX1B      | zinc finger homeobox 1b                                            | 5.66  |     | 8.57   |     | 3.48   |     |
| 235593_at               | ZFHX1B      | zinc finger homeobox 1b                                            | 8.00  |     | 10.56  |     | 7.46   |     |
| 239296_at               | ZFHX1B      | Zinc finger homeobox 1b                                            | 2.46  |     | 2.30   |     | 9.85   |     |
| 223383_at               | ZNRF1       | zinc and ring finger 1                                             | 16.00 |     | 8.57   |     | 21.11  |     |
| 212414_s_at             | Sep6        | septin 6 /// cytokine-like nuclear factor n-pac                    | -2.46 | D   | -3.03  | D   | -4.29  | D   |
| 228941_at               | ---         | Transcribed locus                                                  | -2.00 | D   | -5.66  | D   | -2.46  | D   |
| 239895_at               | ---         | ---                                                                | -4.29 | D   | -3.48  | D   | -2.00  | D   |
| 232905_at               | ---         | CDNA: FLJ21221 fis, clone COL00570                                 | -4.92 | D   | -18.38 | D   | -36.76 | D   |
| 226806_s_at             | ---         | ---                                                                | -3.25 | D   | -4.92  | D   | -2.64  | D   |

| AFFYMETRIX PROBE SET ID | GENE SYMBOL | GENE TITLE                                                      | FC#22  | I/D | FC#2   | I/D | FC#26   | I/D |
|-------------------------|-------------|-----------------------------------------------------------------|--------|-----|--------|-----|---------|-----|
| 227274_at               | ---         | Transcribed locus                                               | -2.14  | D   | -2.46  | D   | -3.48   | D   |
| 230987_at               | ---         | Transcribed locus, strongly similar to XP_530134.1              | -2.30  | D   | -3.48  | D   | -3.03   | D   |
| 1556889_s_at            | ---         | CDNA FLJ37963 fis, clone CTONG2009689                           | -8.57  | D   | -16.00 | D   | -17.15  | D   |
| 1558515_at              | ---         | CDNA clone IMAGE:4328048                                        | -6.50  | D   | -4.29  | D   | -2.30   | D   |
| 1558732_at              | ---         | ---                                                             | -4.92  | D   | -6.50  | D   | -2.14   | D   |
| 1558934_a_at            | ---         | Clone 27609 defective mariner transposon Hsmar2 mRNA sequence   | -6.50  | D   | -3.48  | D   | -4.29   | D   |
| 1559205_s_at            | ---         | Homo sapiens, clone IMAGE:5745627, mRNA                         | -2.83  | D   | -2.46  | D   | -9.85   | D   |
| 1559496_at              | ---         | ---                                                             | -5.28  | D   | -5.66  | D   | -5.66   | D   |
| 1560637_at              | ---         | CDNA clone IMAGE:5744875                                        | -3.03  | D   | -3.25  | D   | -2.46   | D   |
| 1561004_at              | ---         | Full length insert cDNA clone YY74A01                           | -2.30  | D   | -2.64  | D   | -2.14   | D   |
| 1561363_a_at            | ---         | CDNA FLJ36285 fis, clone THYMU2003470                           | -2.83  | D   | -8.57  | D   | -2.14   | D   |
| 1562067_at              | ---         | CDNA clone IMAGE:5312957                                        | -8.00  | D   | -5.28  | D   | -2.00   | D   |
| 1562245_a_at            | ---         | MRNA; cDNA DKFZp686H1629 (from clone DKFZp686H1629)             | -5.28  | D   | -29.86 | D   | -19.70  | D   |
| 1563182_at              | ---         | CDNA clone IMAGE:4796641                                        | -5.28  | D   | -7.46  | D   | -5.66   | D   |
| 1564154_at              | ---         | ---                                                             | -2.64  | D   | -3.25  | D   | -6.06   | D   |
| 1568807_a_at            | ---         | CDNA clone IMAGE:4825606                                        | -4.92  | D   | -4.29  | D   | -21.11  | D   |
| 1569482_at              | ---         | CDNA clone IMAGE:5262617                                        | -4.59  | D   | -6.06  | D   | -2.83   | D   |
| 212675_s_at             | ---         | ---                                                             | -4.00  | D   | -4.59  | D   | -6.06   | D   |
| 212764_at               | ---         | ---                                                             | -8.00  | D   | -5.28  | D   | -17.15  | D   |
| 213156_at               | ---         | Homo sapiens, clone IMAGE:4214654, mRNA                         | -3.25  | D   | -4.92  | D   | -2.14   | D   |
| 213158_at               | ---         | Homo sapiens, clone IMAGE:4214654, mRNA                         | -2.14  | D   | -3.48  | D   | -2.30   | D   |
| 213750_at               | ---         | Full length insert cDNA YH77E09                                 | -2.30  | D   | -3.03  | D   | -4.59   | D   |
| 214148_at               | ---         | Clone 23641 mRNA sequence                                       | -2.14  | D   | -2.30  | D   | -2.14   | D   |
| 216380_x_at             | ---         | ---                                                             | -2.83  | D   | -2.30  | D   | -2.83   | D   |
| 216857_at               | ---         | T-cell receptor active beta-chain (V10-D-J-C) mRNA, clone PL3.9 | -11.31 | D   | -4.59  | D   | -11.31  | D   |
| 217164_at               | ---         | ---                                                             | -3.25  | D   | -3.48  | D   | -2.00   | D   |
| 217482_at               | ---         | CDNA FLJ11925 fis, clone HEMBB1000354                           | -6.50  | D   | -8.00  | D   | -3.73   | D   |
| 220882_at               | ---         | ---                                                             | -8.00  | D   | -8.57  | D   | -2.00   | D   |
| 222348_at               | ---         | ---                                                             | -68.59 | D   | -55.72 | D   | -21.11  | D   |
| 223358_s_at             | ---         | CDNA FLJ33024 fis, clone THYMU1000532                           | -3.73  | D   | -4.29  | D   | -5.28   | D   |
| 225478_at               | ---         | CDNA FLJ39185 fis, clone OCBBF2004418                           | -3.48  | D   | -4.00  | D   | -6.96   | D   |
| 225611_at               | ---         | ---                                                             | -7.46  | D   | -3.48  | D   | -5.28   | D   |
| 226218_at               | ---         | MRNA; cDNA DKFZp667P0610 (from clone DKFZp667P0610)             | -6.50  | D   | -22.63 | D   | -24.25  | D   |
| 226272_at               | ---         | Full length insert cDNA clone ZD79H10                           | -10.56 | D   | -19.70 | D   | -36.76  | D   |
| 226333_at               | ---         | ---                                                             | -3.73  | D   | -2.30  | D   | -13.00  | D   |
| 226458_at               | ---         | CDNA FLJ30340 fis, clone BRACE2007411                           | -2.14  | D   | -3.73  | D   | -2.30   | D   |
| 226591_at               | ---         | CDNA FLJ33569 fis, clone BRAMY2010317                           | -2.64  | D   | -4.59  | D   | -2.30   | D   |
| 226765_at               | ---         | CDNA clone IMAGE:3897439                                        | -9.19  | D   | -6.96  | D   | -6.06   | D   |
| 226869_at               | ---         | Full length insert cDNA clone ZD77F06                           | -64.00 | D   | -34.30 | D   | -119.43 | D   |
| 227082_at               | ---         | MRNA; cDNA DKFZp586K1922 (from clone DKFZp586K1922)             | -3.25  | D   | -6.50  | D   | -2.00   | D   |
| 227576_at               | ---         | CDNA FLJ42015 fis, clone SPLEN2032813                           | -6.50  | D   | -6.06  | D   | -2.30   | D   |
| 227747_at               | ---         | ---                                                             | -8.57  | D   | -8.57  | D   | -4.92   | D   |
| 227762_at               | ---         | Transcribed locus                                               | -4.92  | D   | -3.25  | D   | -13.00  | D   |
| 228049_x_at             | ---         | Transcribed locus                                               | -4.00  | D   | -4.59  | D   | -6.96   | D   |
| 228091_at               | ---         | Full-length cDNA clone CS0DB009YL20                             | -3.03  | D   | -2.83  | D   | -2.30   | D   |
| 228190_at               | ---         | ---                                                             | -2.46  | D   | -2.46  | D   | -2.30   | D   |
| 228242_at               | ---         | ---                                                             | -2.30  | D   | -2.64  | D   | -3.03   | D   |
| 228314_at               | ---         | ---                                                             | -3.03  | D   | -4.29  | D   | -2.00   | D   |
| 228390_at               | ---         | CDNA clone IMAGE:5259272                                        | -4.92  | D   | -8.00  | D   | -3.48   | D   |
| 228549_at               | ---         | ---                                                             | -3.25  | D   | -2.64  | D   | -8.57   | D   |
| 228623_at               | ---         | Transcribed locus, weakly similar to XP_517454.1                | -11.31 | D   | -6.96  | D   | -2.64   | D   |
| 228661_s_at             | ---         | CDNA FLJ11489 fis, clone HEMBA1001915                           | -5.28  | D   | -6.50  | D   | -4.29   | D   |
| 228745_at               | ---         | CDNA FLJ33275 fis, clone ASTRO2008040                           | -2.64  | D   | -2.30  | D   | -4.59   | D   |
| 228854_at               | ---         | Transcribed locus                                               | -14.93 | D   | -12.13 | D   | -16.00  | D   |
| 228972_at               | ---         | ---                                                             | -2.30  | D   | -3.25  | D   | -3.03   | D   |
| 229029_at               | ---         | ---                                                             | -6.50  | D   | -6.50  | D   | -32.00  | D   |
| 229064_s_at             | ---         | ---                                                             | -6.50  | D   | -7.46  | D   | -97.01  | D   |
| 229072_at               | ---         | CDNA clone IMAGE:5259272                                        | -3.73  | D   | -4.92  | D   | -3.03   | D   |
| 229116_at               | ---         | CDNA clone IMAGE:30721737                                       | -59.71 | D   | -59.71 | D   | -29.86  | D   |
| 229850_at               | ---         | Full length insert cDNA clone YX81F03                           | -3.73  | D   | -3.03  | D   | -3.48   | D   |
| 230083_at               | ---         | Full length insert cDNA clone YI48C03                           | -2.83  | D   | -10.56 | D   | -14.93  | D   |
| 230913_at               | ---         | Full length insert cDNA clone ZE12B03                           | -5.66  | D   | -6.96  | D   | -9.19   | D   |

| AFFYMETRIX PROBE SET ID | GENE SYMBOL | GENE TITLE                                                      | FC#22  | I/D | FC#2   | I/D | FC#26  | I/D |
|-------------------------|-------------|-----------------------------------------------------------------|--------|-----|--------|-----|--------|-----|
| 231247_s_at             | ---         | CDNA FLJ36837 fis, clone ASTRO2011422                           | -2.30  | D   | -4.29  | D   | -3.48  | D   |
| 231862_at               | ---         | CDNA clone IMAGE:4842353                                        | -2.30  | D   | -2.14  | D   | -4.29  | D   |
| 232125_at               | ---         | CDNA FLJ34585 fis, clone KIDNE2008758                           | -3.03  | D   | -4.29  | D   | -4.92  | D   |
| 232165_at               | ---         | ---                                                             | -5.66  | D   | -14.93 | D   | -10.56 | D   |
| 232511_at               | ---         | CDNA clone IMAGE:5310744                                        | -4.00  | D   | -4.59  | D   | -2.00  | D   |
| 232752_at               | ---         | Homo sapiens, clone IMAGE:4095671, mRNA                         | -73.52 | D   | -5.66  | D   | -8.00  | D   |
| 233401_at               | ---         | CDNA FLJ11892 fis, clone HEMBA1007281                           | -14.93 | D   | -42.22 | D   | -29.86 | D   |
| 235028_at               | ---         | CDNA FLJ42313 fis, clone TRACH2019425                           | -13.00 | D   | -6.06  | D   | -2.00  | D   |
| 235046_at               | ---         | Transcribed locus, moderately similar to XP_518244.1            | -5.28  | D   | -19.70 | D   | -3.48  | D   |
| 235109_at               | ---         | CDNA FLJ40581 fis, clone THYMU2007729                           | -4.92  | D   | -2.83  | D   | -18.38 | D   |
| 235436_at               | ---         | ---                                                             | -3.25  | D   | -4.92  | D   | -3.25  | D   |
| 235888_at               | ---         | Transcribed locus                                               | -29.86 | D   | -2.00  | D   | -4.00  | D   |
| 235890_at               | ---         | Transcribed locus                                               | -2.83  | D   | -3.73  | D   | -2.46  | D   |
| 236198_at               | ---         | Transcribed locus                                               | -6.06  | D   | -8.57  | D   | -12.13 | D   |
| 236220_at               | ---         | Transcribed locus                                               | -27.86 | D   | -10.56 | D   | -34.30 | D   |
| 236595_at               | ---         | ---                                                             | -2.64  | D   | -2.00  | D   | -24.25 | D   |
| 236685_at               | ---         | Transcribed locus                                               | -17.15 | D   | -14.93 | D   | -10.56 | D   |
| 236858_s_at             | ---         | ---                                                             | -6.06  | D   | -6.50  | D   | -39.40 | D   |
| 236962_at               | ---         | Transcribed locus                                               | -3.03  | D   | -3.48  | D   | -3.48  | D   |
| 236963_at               | ---         | Transcribed locus, weakly similar to XP_371841.1                | -17.15 | D   | -21.11 | D   | -4.00  | D   |
| 237747_at               | ---         | ---                                                             | -4.00  | D   | -3.25  | D   | -2.14  | D   |
| 238155_at               | ---         | Transcribed locus, weakly similar to NP_787073.2                | -3.25  | D   | -3.73  | D   | -3.48  | D   |
| 238673_at               | ---         | Transcribed locus                                               | -10.56 | D   | -13.93 | D   | -10.56 | D   |
| 238861_at               | ---         | MRNA; clone CD 43T7                                             | -2.30  | D   | -2.00  | D   | -3.03  | D   |
| 238918_at               | ---         | CDNA FLJ42015 fis, clone SPLEN2032813                           | -3.48  | D   | -2.64  | D   | -2.46  | D   |
| 239231_at               | ---         | CDNA FLJ41910 fis, clone PEBLM2007834                           | -3.03  | D   | -6.96  | D   | -2.14  | D   |
| 239278_at               | ---         | CDNA clone IMAGE:5301129                                        | -4.29  | D   | -4.29  | D   | -5.28  | D   |
| 239301_at               | ---         | Transcribed locus                                               | -3.03  | D   | -9.19  | D   | -2.30  | D   |
| 239726_at               | ---         | ---                                                             | -3.25  | D   | -4.29  | D   | -8.57  | D   |
| 239888_at               | ---         | ---                                                             | -3.03  | D   | -4.00  | D   | -3.03  | D   |
| 240865_at               | ---         | ---                                                             | -8.00  | D   | -12.13 | D   | -5.28  | D   |
| 241365_at               | ---         | CDNA FLJ42259 fis, clone TKIDN2011289                           | -9.19  | D   | -14.93 | D   | -6.06  | D   |
| 241388_at               | ---         | CDNA FLJ40566 fis, clone THYMU2004733                           | -2.64  | D   | -3.48  | D   | -2.14  | D   |
| 241505_at               | ---         | Transcribed locus                                               | -21.11 | D   | -5.66  | D   | -2.64  | D   |
| 241819_at               | ---         | ---                                                             | -8.57  | D   | -11.31 | D   | -14.93 | D   |
| 241936_x_at             | ---         | Transcribed locus, weakly similar to XP_517655.1                | -3.25  | D   | -2.14  | D   | -2.64  | D   |
| 242289_at               | ---         | ---                                                             | -2.46  | D   | -6.50  | D   | -2.14  | D   |
| 242388_x_at             | ---         | ---                                                             | -3.25  | D   | -10.56 | D   | -3.73  | D   |
| 243791_at               | ---         | Transcribed locus                                               | -11.31 | D   | -7.46  | D   | -2.30  | D   |
| 243810_at               | ---         | Transcribed locus                                               | -14.93 | D   | -45.25 | D   | -73.52 | D   |
| 244422_at               | ---         | Transcribed locus                                               | -6.96  | D   | -12.13 | D   | -9.85  | D   |
| 244636_at               | ---         | Transcribed locus                                               | -4.92  | D   | -2.30  | D   | -2.00  | D   |
| 244798_at               | ---         | ---                                                             | -36.76 | D   | -4.29  | D   | -16.00 | D   |
| 244860_at               | ---         | Transcribed locus                                               | -36.76 | D   | -4.59  | D   | -2.64  | D   |
| 244881_at               | ---         | Transcribed locus                                               | -4.59  | D   | -4.92  | D   | -3.03  | D   |
| 201737_s_at             | MARCH6      | membrane-associated ring finger (C3HC4) 6                       | -2.14  | D   | -2.64  | D   | -2.46  | D   |
| 212413_at               | SEPT6       | septin 6                                                        | -3.03  | D   | -3.03  | D   | -4.59  | D   |
| 213666_at               | SEPT6       | septin 6                                                        | -4.92  | D   | -2.30  | D   | -5.28  | D   |
| 214298_x_at             | SEPT6       | septin 6                                                        | -3.73  | D   | -2.83  | D   | -3.48  | D   |
| 205434_s_at             | AAK1        | AP2 associated kinase 1                                         | -3.25  | D   | -3.03  | D   | -2.14  | D   |
| 204567_s_at             | ABCG1       | ATP-binding cassette, sub-family G (WHITE), member 1            | -5.66  | D   | -4.00  | D   | -14.93 | D   |
| 238563_at               | ABI1        | Abl-interactor 1                                                | -2.30  | D   | -3.03  | D   | -2.00  | D   |
| 200965_s_at             | ABLIM1      | actin binding LIM protein 1                                     | -3.48  | D   | -5.28  | D   | -2.46  | D   |
| 236401_at               | ABP1        | Amiloride binding protein 1 (amine oxidase (copper-containing)) | -3.48  | D   | -4.92  | D   | -3.03  | D   |
| 236583_at               | ABP1        | Amiloride binding protein 1 (amine oxidase (copper-containing)) | -3.73  | D   | -6.50  | D   | -4.59  | D   |
| 211207_s_at             | ACSL6       | acyl-CoA synthetase long-chain family member 6                  | -8.00  | D   | -6.96  | D   | -6.50  | D   |
| 229725_at               | ACSL6       | Acyl-CoA synthetase long-chain family member 6                  | -8.57  | D   | -13.93 | D   | -8.00  | D   |
| 205942_s_at             | ACSM3       | acyl-CoA synthetase medium-chain family member 3                | -10.56 | D   | -13.93 | D   | -3.73  | D   |
| 208636_at               | ACTN1       | actinin, alpha 1                                                | -7.46  | D   | -4.59  | D   | -14.93 | D   |
| 208637_x_at             | ACTN1       | actinin, alpha 1                                                | -6.50  | D   | -3.73  | D   | -16.00 | D   |
| 1552519_at              | ACVR1C      | activin A receptor, type IC                                     | -7.46  | D   | -5.66  | D   | -6.06  | D   |
| 228416_at               | ACVR2A      | activin A receptor, type IIA                                    | -4.00  | D   | -4.00  | D   | -4.29  | D   |

| AFFYMETRIX PROBE SET ID | GENE SYMBOL | GENE TITLE                                                                 | FC#22  | I/D | FC#2   | I/D | FC#26   | I/D |
|-------------------------|-------------|----------------------------------------------------------------------------|--------|-----|--------|-----|---------|-----|
| 203865_s_at             | ADARB1      | adenosine deaminase, RNA-specific                                          | -2.83  | D   | -2.64  | D   | -3.48   | D   |
| 239171_at               | ADD3        | Adducin 3 (gamma)                                                          | -5.66  | D   | -6.06  | D   | -2.14   | D   |
| 239131_at               | ADNP        | Activity-dependent neuroprotector                                          | -4.00  | D   | -6.06  | D   | -2.14   | D   |
| 205013_s_at             | ADORA2A     | adenosine A2a receptor                                                     | -3.48  | D   | -2.83  | D   | -14.93  | D   |
| 237383_at               | AFF1        | AF4/FMR2 family, member 1                                                  | -5.28  | D   | -4.00  | D   | -4.29   | D   |
| 227198_at               | AFF3        | AF4/FMR2 family, member 3                                                  | -3.03  | D   | -4.92  | D   | -4.92   | D   |
| 218096_at               | AGPAT5      | 1-acylglycerol-3-phosphate O-acyltransferase 5                             | -2.46  | D   | -3.03  | D   | -2.64   | D   |
| 212543_at               | AIM1        | absent in melanoma 1                                                       | -2.14  | D   | -2.30  | D   | -2.46   | D   |
| 201674_s_at             | AKAP1       | A kinase (PRKA) anchor protein 1                                           | -4.00  | D   | -3.48  | D   | -3.25   | D   |
| 201675_at               | AKAP1       | A kinase (PRKA) anchor protein 1                                           | -3.25  | D   | -3.03  | D   | -3.25   | D   |
| 210625_s_at             | AKAP1       | A kinase (PRKA) anchor protein 1                                           | -2.83  | D   | -3.48  | D   | -17.15  | D   |
| 243450_at               | AKAP13      | A kinase (PRKA) anchor protein 13                                          | -12.13 | D   | -18.38 | D   | -3.03   | D   |
| 209160_at               | AKR1C3      | aldo-keto reductase family 1, member C3                                    | -48.50 | D   | -64.00 | D   | -168.90 | D   |
| 242876_at               | AKT3        | V-akt murine thymoma viral oncogene homolog 3 (protein kinase B, gamma)    | -3.48  | D   | -3.73  | D   | -2.14   | D   |
| 203608_at               | ALDH5A1     | aldehyde dehydrogenase 5 family, member A1                                 | -42.22 | D   | -8.57  | D   | -3.25   | D   |
| 223318_s_at             | ALKBH7      | alkB, alkylation repair homolog 7 (E. coli)                                | -2.83  | D   | -2.30  | D   | -6.96   | D   |
| 226431_at               | ALS2CR13    | amyotrophic lateral sclerosis 2 (juvenile) chromosome region, candidate 13 | -4.00  | D   | -7.46  | D   | -6.50   | D   |
| 226718_at               | AMIGO1      | adhesion molecule with Ig-like domain 1                                    | -6.06  | D   | -6.50  | D   | -6.96   | D   |
| 207992_s_at             | AMPD3       | adenosine monophosphate deaminase (isoform E)                              | -2.46  | D   | -3.03  | D   | -24.25  | D   |
| 206385_s_at             | ANK3        | ankyrin 3, node of Ranvier (ankyrin G)                                     | -4.29  | D   | -4.92  | D   | -5.28   | D   |
| 237839_at               | ANK3        | Ankyrin 3, node of Ranvier (ankyrin G)                                     | 103.97 | D   | -29.86 | D   | -73.52  | D   |
| 223093_at               | ANKH        | ankylosis, progressive homolog (mouse)                                     | -2.46  | D   | -2.46  | D   | -2.00   | D   |
| 239449_at               | ANKH        | Ankylosis, progressive homolog (mouse)                                     | -8.00  | D   | -6.50  | D   | -4.00   | D   |
| 213005_s_at             | ANKRD15     | ankyrin repeat domain 15                                                   | -3.48  | D   | -4.00  | D   | -45.25  | D   |
| 210027_s_at             | APEX1       | APEX nuclease (multifunctional DNA repair enzyme) 1                        | -2.64  | D   | -2.46  | D   | -3.73   | D   |
| 203747_at               | AQP3        | aquaporin 3 (Gill blood group)                                             | -4.29  | D   | -9.19  | D   | -5.28   | D   |
| 39248_at                | AQP3        | aquaporin 3 (Gill blood group)                                             | -6.50  | D   | -13.00 | D   | -14.93  | D   |
| 244061_at               | ARHGAP15    | Rho GTPase activating protein 15                                           | -7.46  | D   | -8.00  | D   | -2.83   | D   |
| 217936_at               | ARHGAP5     | Rho GTPase activating protein 5                                            | -2.83  | D   | -4.59  | D   | -12.13  | D   |
| 233849_s_at             | ARHGAP5     | Rho GTPase activating protein 5                                            | -3.25  | D   | -4.00  | D   | -6.06   | D   |
| 235635_at               | ARHGAP5     | Rho GTPase activating protein 5                                            | -5.28  | D   | -6.06  | D   | -21.11  | D   |
| 242110_at               | ARHGAP5     | Rho GTPase activating protein 5                                            | -10.56 | D   | -5.28  | D   | -7.46   | D   |
| 203404_at               | ARMCX2      | armadillo repeat containing, X-linked 2                                    | -36.76 | D   | -6.96  | D   | -42.22  | D   |
| 228423_at               | ASAP        | aster-associated protein                                                   | -10.56 | D   | -6.96  | D   | -21.11  | D   |
| 203427_at               | ASF1A       | ASF1 anti-silencing function 1 homolog A (S. cerevisiae)                   | -2.64  | D   | -6.06  | D   | -2.64   | D   |
| 203428_s_at             | ASF1A       | ASF1 anti-silencing function 1 homolog A (S. cerevisiae)                   | -2.14  | D   | -4.00  | D   | -2.14   | D   |
| 228381_at               | ATF7IP2     | Activating transcription factor 7 interacting protein 2                    | -2.83  | D   | -2.46  | D   | -2.83   | D   |
| 1553387_at              | ATM         | ataxia telangiectasia mutated (includes complementation groups A, C and D) | -4.29  | D   | -3.48  | D   | -2.64   | D   |
| 212672_at               | ATM         | ataxia telangiectasia mutated (includes complementation groups A, C and D) | -2.14  | D   | -3.73  | D   | -2.00   | D   |
| 209281_s_at             | ATP2B1      | ATPase, Ca++ transporting, plasma membrane 1                               | -3.03  | D   | -2.00  | D   | -3.25   | D   |
| 212930_at               | ATP2B1      | ATPase, Ca++ transporting, plasma membrane 1                               | -2.00  | D   | -2.00  | D   | -3.25   | D   |
| 213587_s_at             | ATP6V0E2L   | ATPase, H+ transporting V0 subunit E2-like (rat)                           | -2.00  | D   | -2.00  | D   | -2.64   | D   |
| 222696_at               | AXIN2       | axin 2 (conductin, axil)                                                   | -6.06  | D   | -4.59  | D   | -6.96   | D   |
| 210121_at               | B3GALT2     | UDP-Gal:betaGlcNAc beta 1,3-galactosyltransferase, polypeptide 2           | -5.28  | D   | -48.50 | D   | -21.11  | D   |
| 217452_s_at             | B3GALT2     | UDP-Gal:betaGlcNAc beta 1,3-galactosyltransferase, polypeptide 2           | -10.56 | D   | 274.37 | D   | -181.02 | D   |
| 1556451_at              | BACH2       | BTB and CNC homology 1, basic leucine zipper transcription factor 2        | -9.85  | D   | -8.57  | D   | -21.11  | D   |
| 215907_at               | BACH2       | BTB and CNC homology 1, basic leucine zipper transcription factor 2        | -7.46  | D   | -6.50  | D   | -5.66   | D   |
| 221234_s_at             | BACH2       | BTB and CNC homology 1, basic leucine zipper transcription factor 2        | -13.93 | D   | -14.93 | D   | -18.38  | D   |
| 227173_s_at             | BACH2       | BTB and CNC homology 1, basic leucine zipper transcription factor 2        | -18.38 | D   | -13.00 | D   | -13.93  | D   |
| 236307_at               | BACH2       | BTB and CNC homology 1, basic leucine zipper transcription factor 2        | 119.43 | D   | -55.72 | D   | -137.19 | D   |
| 236796_at               | BACH2       | BTB and CNC homology 1, basic leucine zipper transcription factor 2        | -18.38 | D   | -7.46  | D   | -8.57   | D   |
| 1557239_at              | BBX         | Bobby sox homolog (Drosophila)                                             | -3.73  | D   | -4.59  | D   | -2.00   | D   |
| 1557240_a_at            | BBX         | Bobby sox homolog (Drosophila)                                             | -4.92  | D   | -5.28  | D   | -2.30   | D   |
| 203685_at               | BCL2        | B-cell CLL/lymphoma 2                                                      | -4.29  | D   | -8.57  | D   | -6.06   | D   |
| 232210_at               | BCL2        | B-cell CLL/lymphoma 2                                                      | -13.93 | D   | -45.25 | D   | -12.13  | D   |
| 232614_at               | BCL2        | B-cell CLL/lymphoma 2                                                      | -42.22 | D   | -25.99 | D   | -14.93  | D   |
| 244035_at               | BCL2        | B-cell CLL/lymphoma 2                                                      | -7.46  | D   | -9.19  | D   | -16.00  | D   |
| 242819_at               | BET1        | BET1 homolog (S. cerevisiae)                                               | -5.28  | D   | -7.46  | D   | -3.73   | D   |
| 224367_at               | BEX2        | brain expressed X-linked 2 /// brain expressed X-linked 2                  | -6.06  | D   | -10.56 | D   | -25.99  | D   |



| AFFYMETRIX PROBE SET ID | GENE SYMBOL | GENE TITLE                                                                       | FC#22  | I/D | FC#2   | I/D | FC#26   | I/D |
|-------------------------|-------------|----------------------------------------------------------------------------------|--------|-----|--------|-----|---------|-----|
| 215440_s_at             | BEXL1       | brain expressed X-linked-like 1                                                  | -6.96  | D   | -2.30  | D   | -32.00  | D   |
| 210538_s_at             | BIRC3       | baculoviral IAP repeat-containing 3                                              | -2.30  | D   | -3.48  | D   | -2.14   | D   |
| 201848_s_at             | BNIP3       | BCL2/adenovirus E1B 19kDa interacting protein 3                                  | -3.03  | D   | -2.00  | D   | -2.46   | D   |
| 201849_at               | BNIP3       | BCL2/adenovirus E1B 19kDa interacting protein 3                                  | -2.64  | D   | -3.25  | D   | -3.03   | D   |
| 228570_at               | BTBD11      | BTB (POZ) domain containing 11                                                   | -4.59  | D   | -4.29  | D   | -13.00  | D   |
| 238692_at               | BTBD11      | BTB (POZ) domain containing 11                                                   | -6.50  | D   | -4.29  | D   | -9.19   | D   |
| 240347_at               | BTG1        | B-cell translocation gene 1, anti-proliferative                                  | 137.19 | D   | -8.57  | D   | -4.92   | D   |
| 243509_at               | BTG1        | B-cell translocation gene 1, anti-proliferative                                  | -6.50  | D   | -4.92  | D   | -2.46   | D   |
| 217809_at               | BZW2        | basic leucine zipper and W2 domains 2                                            | -2.14  | D   | -2.00  | D   | -2.83   | D   |
| 212771_at               | C10orf38    | chromosome 10 open reading frame 38                                              | -4.00  | D   | -4.00  | D   | -16.00  | D   |
| 224435_at               | C10orf58    | chromosome 10 open reading frame 58                                              | -4.00  | D   | -2.46  | D   | -6.50   | D   |
| 222785_x_at             | C11orf1     | chromosome 11 open reading frame 1                                               | -2.00  | D   | -3.03  | D   | -2.46   | D   |
| 231530_s_at             | C11orf1     | chromosome 11 open reading frame 1                                               | -2.30  | D   | -3.03  | D   | -2.46   | D   |
| 212560_at               | C11orf32    | chromosome 11 open reading frame 32                                              | -3.48  | D   | -3.25  | D   | -25.99  | D   |
| 224759_s_at             | C12orf23    | chromosome 12 open reading frame 23                                              | -2.14  | D   | -4.59  | D   | -2.00   | D   |
| 236816_at               | C12orf30    | chromosome 12 open reading frame 30                                              | -2.64  | D   | -2.30  | D   | -2.00   | D   |
| 242874_at               | C14orf161   | Chromosome 14 open reading frame 161                                             | -21.11 | D   | -13.93 | D   | -22.63  | D   |
| 243729_at               | C14orf161   | Chromosome 14 open reading frame 161                                             | -4.29  | D   | -4.29  | D   | -128.00 | D   |
| 1559097_at              | C14orf64    | chromosome 14 open reading frame 64                                              | -4.92  | D   | -6.50  | D   | -11.31  | D   |
| 232094_at               | C15orf29    | Chromosome 15 open reading frame 29                                              | -3.25  | D   | -4.92  | D   | -2.30   | D   |
| 219315_s_at             | C16orf30    | chromosome 16 open reading frame 30                                              | -13.93 | D   | -18.38 | D   | -11.31  | D   |
| 223401_at               | C17orf48    | chromosome 17 open reading frame 48                                              | -2.00  | D   | -2.83  | D   | -2.00   | D   |
| 207996_s_at             | C18orf1     | chromosome 18 open reading frame 1                                               | -4.92  | D   | -3.48  | D   | -4.29   | D   |
| 1555194_at              | C18orf17    | Chromosome 18 open reading frame 17                                              | -3.25  | D   | -6.06  | D   | -19.70  | D   |
| 230747_s_at             | C18orf17    | Chromosome 18 open reading frame 17                                              | -3.03  | D   | -2.83  | D   | -8.00   | D   |
| 238480_at               | C18orf17    | Chromosome 18 open reading frame 17                                              | -2.46  | D   | -2.64  | D   | -3.73   | D   |
| 232235_at               | C18orf4     | chromosome 18 open reading frame 4                                               | -24.25 | D   | -13.00 | D   | -45.25  | D   |
| 221648_s_at             | C1orf121    | chromosome 1 open reading frame 121                                              | -4.59  | D   | -4.92  | D   | -4.59   | D   |
| 208910_s_at             | C1QBP       | complement component 1, q subcomponent binding protein                           | -2.00  | D   | -2.00  | D   | -3.03   | D   |
| 214214_s_at             | C1QBP       | complement component 1, q subcomponent binding protein                           | -2.00  | D   | -2.00  | D   | -4.29   | D   |
| 233241_at               | C20orf19    | chromosome 20 open reading frame 19                                              | -6.50  | D   | -6.50  | D   | -4.92   | D   |
| 219570_at               | C20orf23    | chromosome 20 open reading frame 23                                              | -12.13 | D   | -2.83  | D   | -6.06   | D   |
| 232500_at               | C20orf74    | chromosome 20 open reading frame 74                                              | -4.92  | D   | -4.92  | D   | -2.64   | D   |
| 239660_at               | C20orf74    | chromosome 20 open reading frame 74                                              | -5.28  | D   | -4.92  | D   | -4.59   | D   |
| 239208_s_at             | C21orf57    | Chromosome 21 open reading frame 57                                              | -4.00  | D   | -2.30  | D   | -2.00   | D   |
| 238785_at               | C3orf63     | Chromosome 3 open reading frame 63                                               | -2.30  | D   | -2.64  | D   | -2.83   | D   |
| 219023_at               | C4orf16     | chromosome 4 open reading frame 16                                               | -2.00  | D   | -2.00  | D   | -2.46   | D   |
| 218561_s_at             | C6orf149    | chromosome 6 open reading frame 149                                              | -2.00  | D   | -2.30  | D   | -2.64   | D   |
| 1558971_at              | C6orf190    | chromosome 6 open reading frame 190                                              | -13.93 | D   | -29.86 | D   | -59.71  | D   |
| 1558972_s_at            | C6orf190    | chromosome 6 open reading frame 190                                              | -19.70 | D   | -29.86 | D   | -36.76  | D   |
| 226301_at               | C6orf192    | chromosome 6 open reading frame 192                                              | -3.48  | D   | -2.83  | D   | -8.00   | D   |
| 209829_at               | C6orf32     | chromosome 6 open reading frame 32                                               | -2.46  | D   | -4.00  | D   | -2.83   | D   |
| 220755_s_at             | C6orf48     | chromosome 6 open reading frame 48                                               | -2.00  | D   | -2.00  | D   | -3.25   | D   |
| 1552563_a_at            | C8orf6      | chromosome 8 open reading frame 6                                                | -7.46  | D   | -13.93 | D   | -5.66   | D   |
| 215390_at               | C9orf5      | Chromosome 9 open reading frame 5                                                | -6.06  | D   | -4.59  | D   | -3.48   | D   |
| 202715_at               | CAD         | carbamoyl-phosphate synthetase 2, aspartate transcarbamylase, and dihydroorotase | -2.00  | D   | -2.30  | D   | -3.25   | D   |
| 241871_at               | CAMK4       | calcium/calmodulin-dependent protein kinase IV                                   | -10.56 | D   | -21.11 | D   | -78.79  | D   |
| 239778_x_at             | CAPN7       | Calpain 7                                                                        | -4.29  | D   | -2.83  | D   | -2.46   | D   |
| 239545_at               | CASD1       | CAS1 domain containing 1                                                         | -4.92  | D   | -5.66  | D   | -2.00   | D   |
| 207620_s_at             | CASK        | calcium/calmodulin-dependent serine protein kinase (MAGUK family)                | -3.48  | D   | -2.00  | D   | -3.25   | D   |
| 211208_s_at             | CASK        | calcium/calmodulin-dependent serine protein kinase (MAGUK family)                | -4.29  | D   | -3.48  | D   | -11.31  | D   |
| 209790_s_at             | CASP6       | caspase 6, apoptosis-related cysteine peptidase                                  | -3.73  | D   | -4.29  | D   | -2.83   | D   |
| 242323_at               | CASP6       | Caspase 6, apoptosis-related cysteine peptidase                                  | -3.25  | D   | -3.25  | D   | -2.30   | D   |
| 233614_at               | CBLB        | Cas-Br-M (murine) ecotropic retroviral transforming sequence b                   | -9.85  | D   | -7.46  | D   | -4.29   | D   |
| 234112_at               | CBLB        | Cas-Br-M (murine) ecotropic retroviral transforming sequence b                   | -3.25  | D   | -4.00  | D   | -2.14   | D   |
| 205379_at               | CBR3        | carbonyl reductase 3                                                             | -3.73  | D   | -9.85  | D   | -17.15  | D   |
| 226287_at               | CCDC34      | coiled-coil domain containing 34                                                 | -2.00  | D   | -2.83  | D   | -2.64   | D   |
| 228122_at               | CCDC66      | coiled-coil domain containing 66                                                 | -2.14  | D   | -3.03  | D   | -2.00   | D   |
| 232489_at               | CCDC76      | coiled-coil domain containing 76                                                 | -2.64  | D   | -5.28  | D   | -2.30   | D   |
| 226521_s_at             | CCDC98      | coiled-coil domain containing 98                                                 | -2.30  | D   | -2.83  | D   | -2.14   | D   |
| 233543_s_at             | CCDC98      | coiled-coil domain containing 98                                                 | -2.30  | D   | -2.64  | D   | -3.03   | D   |

| AFFYMETRIX PROBE SET ID | GENE SYMBOL | GENE TITLE                                                                   | FC#22  | I/D | FC#2   | I/D | FC#26   | I/D |
|-------------------------|-------------|------------------------------------------------------------------------------|--------|-----|--------|-----|---------|-----|
| 1562028_at              | CCND3       | Cyclin D3                                                                    | -2.64  | D   | -4.92  | D   | -2.30   | D   |
| 238243_at               | CCNH        | Cyclin H                                                                     | -3.48  | D   | -2.64  | D   | -6.50   | D   |
| 206337_at               | CCR7        | chemokine (C-C motif) receptor 7 /// chemokine (C-C motif) receptor 7        | -21.11 | D   | -36.76 | D   | -84.45  | D   |
| 205831_at               | CD2         | CD2 molecule /// CD2 molecule                                                | -2.00  | D   | -3.48  | D   | -2.83   | D   |
| 1560395_at              | CD24        | CD24 molecule                                                                | -13.00 | D   | -73.52 | D   | -11.31  | D   |
| 219025_at               | CD248       | CD248 molecule, endosialin                                                   | -21.11 | D   | -3.25  | D   | -8.57   | D   |
| 206545_at               | CD28        | CD28 molecule                                                                | -7.46  | D   | -21.11 | D   | -776.05 | D   |
| 211861_x_at             | CD28        | CD28 molecule                                                                | -4.29  | D   | -11.31 | D   | -51.98  | D   |
| 1565868_at              | CD44        | CD44 molecule (Indian blood group)                                           | -9.85  | D   | -6.50  | D   | -6.50   | D   |
| 217523_at               | CD44        | CD44 molecule (Indian blood group)                                           | -8.00  | D   | -5.66  | D   | -6.96   | D   |
| 230489_at               | CD5         | CD5 molecule                                                                 | -3.48  | D   | -3.73  | D   | -5.66   | D   |
| 201925_s_at             | CD55        | CD55 molecule, decay accelerating factor for complement (Cromer blood group) | -3.03  | D   | -2.00  | D   | -9.85   | D   |
| 200984_s_at             | CD59        | CD59 molecule, complement regulatory protein                                 | -2.30  | D   | -2.14  | D   | -3.73   | D   |
| 200985_s_at             | CD59        | CD59 molecule, complement regulatory protein                                 | -3.03  | D   | -2.64  | D   | -5.28   | D   |
| 205049_s_at             | CD79A       | CD79a molecule, immunoglobulin-associated alpha                              | -2.46  | D   | -4.29  | D   | -4.59   | D   |
| 205288_at               | CDC14A      | CDC14 cell division cycle 14 homolog A (S. cerevisiae)                       | -5.66  | D   | -4.29  | D   | -5.66   | D   |
| 210742_at               | CDC14A      | CDC14 cell division cycle 14 homolog A (S. cerevisiae)                       | -14.93 | D   | -13.00 | D   | -9.19   | D   |
| 210743_s_at             | CDC14A      | CDC14 cell division cycle 14 homolog A (S. cerevisiae)                       | -5.66  | D   | -5.28  | D   | -5.66   | D   |
| 243640_x_at             | CDC14A      | CDC14 cell division cycle 14 homolog A (S. cerevisiae)                       | -12.13 | D   | -7.46  | D   | -8.00   | D   |
| 215846_at               | CDC42SE2    | CDC42 small effector 2                                                       | -4.92  | D   | -4.29  | D   | -3.25   | D   |
| 234260_at               | CDC42SE2    | CDC42 small effector 2                                                       | -5.66  | D   | -9.19  | D   | -2.30   | D   |
| 225081_s_at             | CDCA7L      | cell division cycle associated 7-like                                        | -4.29  | D   | -3.03  | D   | -5.66   | D   |
| 243808_at               | CDK6        | Cyclin-dependent kinase 6                                                    | -17.15 | D   | -3.73  | D   | -2.46   | D   |
| 209501_at               | CDR2        | cerebellar degeneration-related protein 2, 62kDa                             | -3.48  | D   | -4.92  | D   | -4.92   | D   |
| 204066_s_at             | CENTG2      | centaurin, gamma 2                                                           | -6.50  | D   | -2.83  | D   | -5.28   | D   |
| 207971_s_at             | CEP68       | centrosomal protein 68kDa                                                    | -5.66  | D   | -5.28  | D   | -10.56  | D   |
| 212677_s_at             | CEP68       | centrosomal protein 68kDa                                                    | -6.06  | D   | -6.06  | D   | -4.29   | D   |
| 239442_at               | CEP68       | Centrosomal protein 68kDa                                                    | -7.46  | D   | -6.50  | D   | -5.28   | D   |
| 236327_at               | CEPT1       | Choline/ethanolamine phosphotransferase 1                                    | -4.59  | D   | -2.14  | D   | -2.30   | D   |
| 215318_at               | CG012       | hypothetical gene CG012                                                      | -5.66  | D   | -4.59  | D   | -3.03   | D   |
| 243751_at               | CHD2        | Chromodomain helicase DNA binding protein 2                                  | -4.92  | D   | -5.66  | D   | -2.00   | D   |
| 1562673_at              | CHES1       | Checkpoint suppressor 1                                                      | -3.25  | D   | -2.30  | D   | -2.00   | D   |
| 226350_at               | CHML        | choroideremia-like (Rab escort protein 2)                                    | -2.64  | D   | -2.14  | D   | -2.30   | D   |
| 212313_at               | CHMP7       | CHMP family, member 7                                                        | -3.25  | D   | -6.96  | D   | -3.25   | D   |
| 1557733_a_at            | CHRM3       | Cholinergic receptor, muscarinic 3                                           | -13.93 | D   | -21.11 | D   | -42.22  | D   |
| 230656_s_at             | CIRH1A      | cirrhosis, autosomal recessive 1A (cirhin)                                   | -2.00  | D   | -2.00  | D   | -2.14   | D   |
| 221223_x_at             | CISH        | cytokine inducible SH2-containing protein                                    | -6.96  | D   | -4.29  | D   | -14.93  | D   |
| 223377_x_at             | CISH        | cytokine inducible SH2-containing protein                                    | -7.46  | D   | -8.00  | D   | -11.31  | D   |
| 223961_s_at             | CISH        | cytokine inducible SH2-containing protein                                    | -4.92  | D   | -4.92  | D   | -13.00  | D   |
| 213317_at               | CLIC5       | chloride intracellular channel 5                                             | -2.83  | D   | -2.83  | D   | -4.29   | D   |
| 204085_s_at             | CLN5        | ceroid-lipofuscinosis, neuronal 5                                            | -2.46  | D   | -2.46  | D   | -3.03   | D   |
| 204576_s_at             | CLUAP1      | clusterin associated protein 1                                               | -4.92  | D   | -4.00  | D   | -18.38  | D   |
| 212977_at               | CMKOR1      | chemokine orphan receptor 1                                                  | -3.73  | D   | -19.70 | D   | -5.66   | D   |
| 232951_at               | CMTM7       | CKLF-like MARVEL transmembrane domain containing 7                           | -29.86 | D   | -13.93 | D   | -4.29   | D   |
| 234562_x_at             | CMTM8       | CKLF-like MARVEL transmembrane domain containing 8                           | -3.48  | D   | -3.25  | D   | -2.46   | D   |
| 235099_at               | CMTM8       | CKLF-like MARVEL transmembrane domain containing 8                           | -29.86 | D   | -11.31 | D   | -10.56  | D   |
| 228297_at               | CNN3        | Calponin 3, acidic                                                           | -6.50  | D   | -10.56 | D   | -29.86  | D   |
| 222313_at               | CNOT2       | CCR4-NOT transcription complex, subunit 2                                    | -2.46  | D   | -2.64  | D   | -2.30   | D   |
| 239833_at               | COMMD1      | Copper metabolism (Murr1) domain containing 1                                | -5.28  | D   | -6.06  | D   | -3.25   | D   |
| 1560349_at              | COMMD10     | COMM domain containing 10                                                    | -4.92  | D   | -2.83  | D   | -2.46   | D   |
| 1569167_at              | COMMD10     | COMM domain containing 10                                                    | -3.73  | D   | -2.83  | D   | -2.14   | D   |
| 205544_s_at             | CR2         | complement component (3d/Epstein Barr virus) receptor 2                      | -19.70 | D   | -32.00 | D   | -9.85   | D   |
| 237502_at               | CRLS1       | Cardiolipin synthase 1                                                       | -2.00  | D   | -2.46  | D   | -5.28   | D   |
| 229193_at               | CROP        | Cisplatin resistance-associated overexpressed protein                        | -4.59  | D   | -5.66  | D   | -2.46   | D   |
| 1552347_at              | CRYZL1      | crystallin, zeta (quinone reductase)-like 1                                  | -2.64  | D   | -2.46  | D   | -2.00   | D   |
| 222819_at               | CTPS2       | CTP synthase II                                                              | -3.25  | D   | -2.14  | D   | -3.03   | D   |
| 240798_at               | CUTL1       | Cut-like 1, CCAAT displacement protein (Drosophila)                          | -9.19  | D   | -2.64  | D   | -3.25   | D   |
| 207681_at               | CXCR3       | chemokine (C-X-C motif) receptor 3                                           | -16.00 | D   | -8.00  | D   | -22.63  | D   |
| 217119_s_at             | CXCR3       | chemokine (C-X-C motif) receptor 3                                           | -3.48  | D   | -5.28  | D   | -34.30  | D   |
| 206974_at               | CXCR6       | chemokine (C-X-C motif) receptor 6                                           | -5.28  | D   | -6.06  | D   | -22.63  | D   |
| 222996_s_at             | CXXC5       | CXXC finger 5                                                                | -3.03  | D   | -2.00  | D   | -6.06   | D   |
| 233955_x_at             | CXXC5       | CXXC finger 5                                                                | -3.25  | D   | -2.00  | D   | -4.92   | D   |

| AFFYMETRIX PROBE SET ID | GENE SYMBOL   | GENE TITLE                                                                         | FC#22  | I/D | FC#2   | I/D | FC#26   | I/D |
|-------------------------|---------------|------------------------------------------------------------------------------------|--------|-----|--------|-----|---------|-----|
| 209569_x_at             | D4S234E       | DNA segment on chromosome 4 (unique) 234 expressed sequence                        | -5.28  | D   | -4.92  | D   | -42.22  | D   |
| 209570_s_at             | D4S234E       | DNA segment on chromosome 4 (unique) 234 expressed sequence                        | -5.28  | D   | -6.06  | D   | -59.71  | D   |
| 202806_at               | DBN1          | drebrin 1                                                                          | -14.93 | D   | -29.86 | D   | -3.25   | D   |
| 222101_s_at             | DCHS1         | dachsous 1 (Drosophila)                                                            | -8.00  | D   | -22.63 | D   | -24.25  | D   |
| 230180_at               | DDX17         | DEAD (Asp-Glu-Ala-Asp) box polypeptide 17                                          | -2.83  | D   | -3.03  | D   | -3.03   | D   |
| 236210_at               | DDX31         | DEAD (Asp-Glu-Ala-Asp) box polypeptide 31                                          | -9.19  | D   | -3.25  | D   | -2.83   | D   |
| 230607_at               | DENN4A        | DENN/MADD domain containing 4A                                                     | -6.06  | D   | -3.73  | D   | -2.64   | D   |
| 203385_at               | DGKA          | diacylglycerol kinase, alpha 80kDa                                                 | -5.28  | D   | -6.50  | D   | -5.66   | D   |
| 211272_s_at             | DGKA          | diacylglycerol kinase, alpha 80kDa                                                 | -4.29  | D   | -6.96  | D   | -8.00   | D   |
| 238032_at               | DHRS3         | Dehydrogenase/reductase (SDR family) member 3                                      | -8.00  | D   | -9.85  | D   | -8.00   | D   |
| 202481_at               | DHRS3         | dehydrogenase/reductase (SDR family) member 3                                      | -8.57  | D   | -19.70 | D   | -78.79  | D   |
| 230285_at               | DKFZp313A2432 | hypothetical protein DKFZp313A2432                                                 | -2.46  | D   | -3.73  | D   | -2.00   | D   |
| 235085_at               | DKFZp761P0423 | homolog of rat pragma of Rnd2                                                      | -3.25  | D   | -6.50  | D   | -2.00   | D   |
| 214247_s_at             | DKK3          | dickkopf homolog 3 (Xenopus laevis)                                                | -4.00  | D   | -4.59  | D   | -64.00  | D   |
| 215629_s_at             | DLEU2         | deleted in lymphocytic leukemia, 2                                                 | -2.14  | D   | -2.64  | D   | -2.30   | D   |
| 224215_s_at             | DLL1          | delta-like 1 (Drosophila)                                                          | -27.86 | D   | -3.73  | D   | -5.66   | D   |
| 222640_at               | DNMT3A        | DNA (cytosine-5-)-methyltransferase 3 alpha                                        | -2.83  | D   | -2.14  | D   | -3.03   | D   |
| 212538_at               | DOCK9         | dedicator of cytokinesis 9                                                         | -3.25  | D   | -5.28  | D   | -3.48   | D   |
| 232874_at               | DOCK9         | Dedicator of cytokinesis 9                                                         | -9.19  | D   | -6.06  | D   | -4.29   | D   |
| 219590_x_at             | DPH5          | DPH5 homolog (S. cerevisiae)                                                       | -2.30  | D   | -2.14  | D   | -3.25   | D   |
| 222360_at               | DPH5          | DPH5 homolog (S. cerevisiae)                                                       | -3.03  | D   | -2.46  | D   | -2.83   | D   |
| 223671_x_at             | DPH5          | DPH5 homolog (S. cerevisiae)                                                       | -2.46  | D   | -3.25  | D   | -3.03   | D   |
| 224060_s_at             | DPH5          | DPH5 homolog (S. cerevisiae)                                                       | -3.25  | D   | -3.73  | D   | -3.73   | D   |
| 224196_x_at             | DPH5          | DPH5 homolog (S. cerevisiae)                                                       | -2.46  | D   | -3.03  | D   | -3.03   | D   |
| 203716_s_at             | DPP4          | dipeptidyl-peptidase 4 (CD26, adenosine deaminase complexing protein 2)            | -5.28  | D   | -48.50 | D   | -13.93  | D   |
| 203717_at               | DPP4          | dipeptidyl-peptidase 4 (CD26, adenosine deaminase complexing protein 2)            | -5.28  | D   | -19.70 | D   | -10.56  | D   |
| 211478_s_at             | DPP4          | dipeptidyl-peptidase 4 (CD26, adenosine deaminase complexing protein 2)            | -4.92  | D   | -64.00 | D   | -42.22  | D   |
| 237953_at               | DPP4          | Dipeptidyl-peptidase 4 (CD26, adenosine deaminase complexing protein 2)            | -16.00 | D   | -11.31 | D   | -13.00  | D   |
| 226721_at               | DPY19L4       | Dpy-19-like 4 (C. elegans)                                                         | -2.30  | D   | -3.25  | D   | -2.14   | D   |
| 207324_s_at             | DSC1          | desmocollin 1                                                                      | -97.01 | D   | 137.19 | D   | -137.19 | D   |
| 219864_s_at             | DSCR1L2       | Down syndrome critical region gene 1-like 2                                        | -5.28  | D   | -4.92  | D   | -73.52  | D   |
| 236649_at               | DTWD1         | DTW domain containing 1                                                            | -2.46  | D   | -3.73  | D   | -2.30   | D   |
| 1558739_at              | DUSP16        | Dual specificity phosphatase 16                                                    | -3.48  | D   | -6.96  | D   | -3.03   | D   |
| 1558740_s_at            | DUSP16        | Dual specificity phosphatase 16                                                    | -3.03  | D   | -4.92  | D   | -2.30   | D   |
| 224832_at               | DUSP16        | dual specificity phosphatase 16                                                    | -3.73  | D   | -13.93 | D   | -5.28   | D   |
| 202971_s_at             | DYRK2         | dual-specificity tyrosine-(Y)-phosphorylation regulated kinase 2                   | -3.03  | D   | -4.59  | D   | -2.30   | D   |
| 205419_at               | EBI2          | Epstein-Barr virus induced gene 2 (lymphocyte-specific G protein-coupled receptor) | -3.73  | D   | -5.28  | D   | -19.70  | D   |
| 223623_at               | ECRG4         | esophageal cancer related gene 4 protein                                           | -4.29  | D   | -18.38 | D   | -51.98  | D   |
| 204642_at               | EDG1          | endothelial differentiation, sphingolipid G-protein-coupled receptor, 1            | -4.59  | D   | -6.50  | D   | -4.00   | D   |
| 206437_at               | EDG6          | endothelial differentiation, lysophosphatidic acid G-protein-coupled receptor, 6   | -2.46  | D   | -2.64  | D   | -2.30   | D   |
| 238458_at               | EFHA2         | EF-hand domain family, member A2                                                   | -10.56 | D   | -21.11 | D   | -45.25  | D   |
| 225656_at               | EFHC1         | EF-hand domain (C-terminal) containing 1                                           | -2.46  | D   | -2.46  | D   | -2.00   | D   |
| 1556732_at              | EML4          | Echinoderm microtubule associated protein like 4                                   | -4.29  | D   | -4.29  | D   | -3.03   | D   |
| 232587_at               | EML4          | echinoderm microtubule associated protein like 4                                   | -4.00  | D   | -2.30  | D   | -2.30   | D   |
| 233940_at               | EML4          | Echinoderm microtubule associated protein like 4                                   | -5.28  | D   | -4.92  | D   | -3.25   | D   |
| 236379_at               | EPB41         | Erythrocyte membrane protein band 4.1 (elliptocytosis 1, RH-linked)                | -6.50  | D   | -5.66  | D   | -2.30   | D   |
| 228948_at               | EPHA4         | EPH receptor A4                                                                    | -3.73  | D   | -5.66  | D   | -14.93  | D   |
| 209368_at               | EPHX2         | epoxide hydrolase 2, cytoplasmic                                                   | -3.25  | D   | -9.85  | D   | -6.96   | D   |
| 232164_s_at             | EPPK1         | epiplakin 1                                                                        | -4.00  | D   | -5.66  | D   | -14.93  | D   |
| 1557772_at              | EXOC4         | Exocyst complex component 4                                                        | -6.06  | D   | -2.00  | D   | -3.03   | D   |
| 239264_at               | EXOC4         | Exocyst complex component 4                                                        | -5.66  | D   | -3.25  | D   | -2.14   | D   |
| 214734_at               | EXPH5         | exophilin 5                                                                        | -6.96  | D   | -5.28  | D   | -68.59  | D   |
| 213506_at               | F2RL1         | coagulation factor II (thrombin) receptor-like 1                                   | -2.46  | D   | -2.14  | D   | -25.99  | D   |
| 226876_at               | FAM101B       | family with sequence similarity 101, member B                                      | -4.29  | D   | -4.00  | D   | -14.93  | D   |
| 226905_at               | FAM101B       | family with sequence similarity 101, member B                                      | -3.48  | D   | -2.83  | D   | -17.15  | D   |
| 212400_at               | FAM102A       | family with sequence similarity 102, member A                                      | -6.06  | D   | -8.57  | D   | -12.13  | D   |
| 223059_s_at             | FAM107B       | family with sequence similarity 107, member B                                      | -2.14  | D   | -2.83  | D   | -2.14   | D   |
| 229695_at               | FAM107B       | Family with sequence similarity 107, member B                                      | -2.64  | D   | -3.73  | D   | -3.73   | D   |
| 228298_at               | FAM113B       | family with sequence similarity 113, member B                                      | -4.29  | D   | -6.50  | D   | -2.14   | D   |
| 230923_at               | FAM19A1       | family with sequence similarity 19 (chemokine (C-C motif)-like), member A1         | -3.73  | D   | -9.85  | D   | -4.92   | D   |
| 238146_at               | FAM82B        | Family with sequence similarity 82, member B                                       | -2.83  | D   | -3.25  | D   | -2.14   | D   |

| AFFYMETRIX PROBE SET ID | GENE SYMBOL | GENE TITLE                                                                                       | FC#22  | I/D | FC#2   | I/D | FC#26   | I/D |
|-------------------------|-------------|--------------------------------------------------------------------------------------------------|--------|-----|--------|-----|---------|-----|
| 225864_at               | FAM84B      | family with sequence similarity 84, member B                                                     | -4.59  | D   | -3.48  | D   | -97.01  | D   |
| 234758_at               | FARS2       | Phenylalanine-tRNA synthetase 2 (mitochondrial)                                                  | -5.66  | D   | -4.00  | D   | -2.00   | D   |
| 223036_at               | FARSLB      | phenylalanine-tRNA synthetase-like, beta subunit                                                 | -3.25  | D   | -10.56 | D   | -3.03   | D   |
| 232063_x_at             | FARSLB      | phenylalanine-tRNA synthetase-like, beta subunit                                                 | -4.00  | D   | -3.73  | D   | -3.25   | D   |
| 211623_s_at             | FBL         | fibrillarlin /// fibrillarlin                                                                    | -2.14  | D   | -2.30  | D   | -2.83   | D   |
| 203088_at               | FBLN5       | fibulin 5                                                                                        | -13.00 | D   | -16.00 | D   | -8.00   | D   |
| 227641_at               | FBXL16      | F-box and leucine-rich repeat protein 16                                                         | -3.03  | D   | -4.92  | D   | -10.56  | D   |
| 203240_at               | FCGBP       | Fc fragment of IgG binding protein                                                               | -4.00  | D   | -3.25  | D   | -6.50   | D   |
| 242563_at               | FCHSD2      | FCH and double SH3 domains 2                                                                     | -2.83  | D   | -2.64  | D   | -2.30   | D   |
| 235982_at               | FCRL1       | Fc receptor-like 1                                                                               | -2.46  | D   | -14.93 | D   | -32.00  | D   |
| 206492_at               | FHIT        | fragile histidine triad gene                                                                     | -8.00  | D   | -8.00  | D   | -16.00  | D   |
| 201540_at               | FHL1        | four and a half LIM domains 1                                                                    | -2.14  | D   | -2.83  | D   | -7.46   | D   |
| 236520_at               | FKBP1A      | FK506 binding protein 1A, 12kDa                                                                  | -5.66  | D   | -11.31 | D   | -2.14   | D   |
| 204560_at               | FKBP5       | FK506 binding protein 5                                                                          | -2.14  | D   | -2.46  | D   | -9.19   | D   |
| 224840_at               | FKBP5       | FK506 binding protein 5                                                                          | -2.64  | D   | -4.29  | D   | -2.46   | D   |
| 224856_at               | FKBP5       | FK506 binding protein 5                                                                          | -2.46  | D   | -3.25  | D   | -2.83   | D   |
| 219871_at               | FLJ13197    | hypothetical protein FLJ13197                                                                    | -5.66  | D   | -4.00  | D   | -9.19   | D   |
| 218510_x_at             | FLJ20152    | hypothetical protein FLJ20152                                                                    | -18.38 | D   | -24.25 | D   | -90.51  | D   |
| 218532_s_at             | FLJ20152    | hypothetical protein FLJ20152                                                                    | -9.85  | D   | -11.31 | D   | -42.22  | D   |
| 220467_at               | FLJ21272    | hypothetical protein FLJ21272                                                                    | -6.96  | D   | -6.50  | D   | -2.30   | D   |
| 1552716_at              | FLJ23577    | KPL2 protein                                                                                     | -7.46  | D   | -12.13 | D   | -7.46   | D   |
| 231252_at               | FLJ23861    | hypothetical protein FLJ23861                                                                    | -2.46  | D   | -5.28  | D   | -4.59   | D   |
| 225444_at               | FLJ25778    | Hypothetical protein FLJ25778                                                                    | -4.92  | D   | -3.25  | D   | -2.00   | D   |
| 1554067_at              | FLJ32549    | hypothetical protein FLJ32549                                                                    | -3.48  | D   | -4.29  | D   | -4.59   | D   |
| 228686_at               | FLJ33630    | hypothetical protein LOC644873                                                                   | -2.46  | D   | -16.00 | D   | -6.06   | D   |
| 1557895_at              | FLJ35934    | FLJ35934 protein                                                                                 | -6.06  | D   | -6.06  | D   | -4.59   | D   |
| 223477_s_at             | FLJ38663    | hypothetical protein FLJ38663                                                                    | -2.14  | D   | -3.73  | D   | -2.46   | D   |
|                         |             |                                                                                                  | -      |     |        |     |         |     |
| 1569040_s_at            | FLJ40330    | similar to protein immuno-reactive with anti-PTH polyclonal antibodies                           | 194.01 | D   | -4.92  | D   | -13.00  | D   |
| 238148_s_at             | FLJ46385    | FLJ46385 protein                                                                                 | -3.48  | D   | -3.25  | D   | -6.96   | D   |
| 238149_at               | FLJ46385    | FLJ46385 protein                                                                                 | -4.59  | D   | -3.25  | D   | -6.50   | D   |
| 1562416_at              | FLNB        | Filamin B, beta (actin binding protein 278)                                                      | -2.00  | D   | -5.28  | D   | -13.93  | D   |
| 208614_s_at             | FLNB        | filamin B, beta (actin binding protein 278)                                                      | -36.76 | D   | -18.38 | D   | -17.15  | D   |
| 206980_s_at             | FLT3LG      | fms-related tyrosine kinase 3 ligand                                                             | -6.50  | D   | -7.46  | D   | -13.93  | D   |
| 210607_at               | FLT3LG      | fms-related tyrosine kinase 3 ligand                                                             | -5.28  | D   | -6.50  | D   | -8.57   | D   |
| 243876_at               | FNBP1       | Formin binding protein 1                                                                         | -2.30  | D   | -3.48  | D   | -6.50   | D   |
| 202723_s_at             | FOXO1A      | forkhead box O1A (rhabdomyosarcoma)                                                              | -4.00  | D   | -5.28  | D   | -2.83   | D   |
| 202724_s_at             | FOXO1A      | forkhead box O1A (rhabdomyosarcoma)                                                              | -3.73  | D   | -8.00  | D   | -2.64   | D   |
| 232882_at               | FOXO1A      | Forkhead box O1A (rhabdomyosarcoma)                                                              | -19.70 | D   | -11.31 | D   | -6.06   | D   |
| 1569477_at              | FOXO3A      | Forkhead box O3A                                                                                 | -7.46  | D   | -2.83  | D   | -2.14   | D   |
| 1561166_a_at            | FOXP1       | Forkhead box P1                                                                                  | -29.86 | D   | -24.25 | D   | -22.63  | D   |
| 215221_at               | FOXP1       | Forkhead box P1                                                                                  | -6.06  | D   | -6.50  | D   | -12.13  | D   |
| 224838_at               | FOXP1       | forkhead box P1                                                                                  | -2.46  | D   | -3.03  | D   | -2.14   | D   |
| 230415_at               | FOXP1       | Forkhead box P1                                                                                  | -9.85  | D   | -8.57  | D   | -32.00  | D   |
| 235444_at               | FOXP1       | forkhead box P1                                                                                  | -6.96  | D   | -6.96  | D   | -2.64   | D   |
| 240666_at               | FOXP1       | Forkhead box P1                                                                                  | -17.15 | D   | -16.00 | D   | -3.73   | D   |
| 243291_at               | FOXP1       | Forkhead box P1                                                                                  | -39.40 | D   | -11.31 | D   | -128.00 | D   |
| 243878_at               | FOXP1       | Forkhead box P1                                                                                  | -13.00 | D   | -4.29  | D   | -24.25  | D   |
| 244535_at               | FOXP1       | Forkhead box P1                                                                                  | -13.00 | D   | -8.57  | D   | -12.13  | D   |
| 244845_at               | FOXP1       | Forkhead box P1                                                                                  | -73.52 | D   | -22.63 | D   | -19.70  | D   |
| 218373_at               | FTS         | fused toes homolog (mouse)                                                                       | -2.83  | D   | -3.48  | D   | -2.00   | D   |
| 243498_at               | GABPA       | GA binding protein transcription factor, alpha subunit 60kDa                                     | -3.25  | D   | -3.03  | D   | -2.00   | D   |
| 218885_s_at             | GALNT12     | UDP-N-acetyl-alpha-D-galactosamine:polypeptide N-acetylgalactosaminyltransferase 12 (GalNAc-T12) | -3.73  | D   | -3.48  | D   | -2.30   | D   |
| 230097_at               | GART        | Phosphoribosylglycinamide formyltransferase, phosphoribosylglycinamide synthetase                | -2.64  | D   | -4.29  | D   | -2.64   | D   |
| 224741_x_at             | GAS5        | growth arrest-specific 5                                                                         | -3.25  | D   | -3.48  | D   | -3.25   | D   |
| 224841_x_at             | GAS5        | growth arrest-specific 5                                                                         | -2.64  | D   | -3.25  | D   | -3.73   | D   |
| 209602_s_at             | GATA3       | GATA binding protein 3                                                                           | -2.00  | D   | -2.46  | D   | -2.46   | D   |
| 209603_at               | GATA3       | GATA binding protein 3                                                                           | -2.00  | D   | -2.00  | D   | -2.83   | D   |
| 205527_s_at             | GEMIN4      | gem (nuclear organelle) associated protein 4                                                     | -3.03  | D   | -3.25  | D   | -2.14   | D   |
| 1552318_at              | GIMAP1      | GTPase, IMAP family member 1                                                                     | -3.25  | D   | -5.28  | D   | -3.03   | D   |
| 1552315_at              | GIMAP1      | GTPase, IMAP family member 1                                                                     | -3.03  | D   | -4.92  | D   | -3.25   | D   |
| 1552316_a_at            | GIMAP1      | GTPase, IMAP family member 1                                                                     | -3.25  | D   | -4.29  | D   | -3.48   | D   |

| AFFYMETRIX PROBE SET ID | GENE SYMBOL   | GENE TITLE                                                                                    | FC#22  | I/D | FC#2   | I/D | FC#26   | I/D |
|-------------------------|---------------|-----------------------------------------------------------------------------------------------|--------|-----|--------|-----|---------|-----|
| 218805_at               | GIMAP5        | GTPase, IMAP family member 5 /// GTPase, IMAP family member 5                                 | -3.73  | D   | -8.00  | D   | -2.83   | D   |
| 64064_at                | GIMAP5        | GTPase, IMAP family member 5                                                                  | -3.25  | D   | -5.66  | D   | -2.64   | D   |
| 235306_at               | GIMAP8        | GTPase, IMAP family member 8                                                                  | -2.30  | D   | -4.29  | D   | -2.14   | D   |
| 229312_s_at             | GKAP1         | G kinase anchoring protein 1                                                                  | -2.00  | D   | -2.14  | D   | -2.46   | D   |
| 55872_at                | GM632         | KIAA1196 protein                                                                              | -6.96  | D   | -5.66  | D   | -51.98  | D   |
| 207124_s_at             | GNB5          | guanine nucleotide binding protein (G protein), beta 5                                        | -2.14  | D   | -3.03  | D   | -2.14   | D   |
| 208798_x_at             | GOLGA8A       | golgi autoantigen, golgin subfamily a, 8A                                                     | -4.92  | D   | -4.29  | D   | -3.25   | D   |
| 213650_at               | GOLGA8A       | golgi autoantigen, golgin subfamily a, 8A                                                     | -7.46  | D   | -3.03  | D   | -5.28   | D   |
| 210425_x_at             | GOLGA8B       | golgi autoantigen, golgin subfamily a, 8B                                                     | -2.64  | D   | -2.64  | D   | -3.03   | D   |
| 236862_at               | GOPC          | Golgi associated PDZ and coiled-coil motif containing                                         | -2.46  | D   | -2.46  | D   | -2.46   | D   |
| 207926_at               | GP5           | glycoprotein V (platelet)                                                                     | -6.50  | D   | -6.96  | D   | -4.29   | D   |
| 1561195_at              | GPR137B       | G protein-coupled receptor 137B                                                               | -24.25 | D   | -39.40 | D   | -4.59   | D   |
| 231166_at               | GPR155        | G protein-coupled receptor 155                                                                | -4.00  | D   | -4.59  | D   | -8.00   | D   |
| 239533_at               | GPR155        | G protein-coupled receptor 155                                                                | -8.00  | D   | -6.06  | D   | -16.00  | D   |
| 204793_at               | GPRASP1       | G protein-coupled receptor associated sorting protein 1                                       | -11.31 | D   | -21.11 | D   | -34.30  | D   |
| 213170_at               | GPX7          | glutathione peroxidase 7                                                                      | -2.46  | D   | -2.64  | D   | -13.00  | D   |
| 224807_at               | GRAMD1A       | GRAM domain containing 1A                                                                     | -3.25  | D   | -2.00  | D   | -6.06   | D   |
| 229726_at               | GRAP          | GRB2-related adaptor protein                                                                  | -6.06  | D   | -3.73  | D   | -32.00  | D   |
| 205541_s_at             | GSPT2         | G1 to S phase transition 2 /// G1 to S phase transition 2                                     | -2.00  | D   | -2.30  | D   | -5.28   | D   |
| 238880_at               | GTF3A         | general transcription factor IIIA                                                             | -4.00  | D   | -4.29  | D   | -3.25   | D   |
| 202947_s_at             | GYPC          | glycophorin C (Gerbich blood group)                                                           | -2.46  | D   | -2.83  | D   | -2.64   | D   |
| 206666_at               | GZMK          | granzyme K (granzyme 3; tryptase II) /// granzyme K (granzyme 3; tryptase II)                 | -9.85  | D   | -13.93 | D   | -21.11  | D   |
| 1552787_at              | HELB          | helicase (DNA) B                                                                              | -3.48  | D   | -2.46  | D   | -2.64   | D   |
| 208054_at               | HERC4         | hect domain and RLD 4                                                                         | -2.83  | D   | -2.83  | D   | -13.93  | D   |
| 1559932_at              | HEXA          | Hexosaminidase A (alpha polypeptide)                                                          | -9.19  | D   | -19.70 | D   | -25.99  | D   |
| 215316_at               | HIBADH        | 3-hydroxyisobutyrate dehydrogenase                                                            | -6.50  | D   | -21.11 | D   | -4.29   | D   |
| 200093_s_at             | HINT1         | histidine triad nucleotide binding protein 1 /// histidine triad nucleotide binding protein 1 | -2.14  | D   | -2.00  | D   | -2.46   | D   |
| 212641_at               | HIVEP2        | human immunodeficiency virus type I enhancer binding protein 2                                | -3.48  | D   | -4.00  | D   | -8.00   | D   |
| 212642_s_at             | HIVEP2        | human immunodeficiency virus type I enhancer binding protein 2                                | -5.66  | D   | -6.50  | D   | -12.13  | D   |
| 209728_at               | HLA-DRB4      | major histocompatibility complex, class II, DR beta 4                                         | -10.56 | D   | -32.00 | D   | -147.03 | D   |
| 225792_at               | HOOK1         | hook homolog 1 (Drosophila)                                                                   | -27.86 | D   | -13.00 | D   | -9.19   | D   |
| 203914_x_at             | HPGD          | hydroxyprostaglandin dehydrogenase 15-(NAD)                                                   | -29.86 | D   | -7.46  | D   | -6.06   | D   |
| 211548_s_at             | HPGD          | hydroxyprostaglandin dehydrogenase 15-(NAD)                                                   | -9.19  | D   | -11.31 | D   | -10.56  | D   |
| 209657_s_at             | HSF2          | heat shock transcription factor 2                                                             | -2.46  | D   | -2.14  | D   | -2.14   | D   |
| 230718_at               | HSF5          | heat shock transcription factor family member 5                                               | -5.28  | D   | -5.66  | D   | -4.29   | D   |
| 241299_at               | IFT140        | Intraflagellar transport 140 homolog (Chlamydomonas)                                          | -13.93 | D   | -11.31 | D   | -6.06   | D   |
| 203628_at               | IGF1R         | insulin-like growth factor 1 receptor                                                         | -29.86 | D   | -11.31 | D   | -119.43 | D   |
| 236934_at               | IGF1R         | Insulin-like growth factor 1 receptor                                                         | -17.15 | D   | -12.13 | D   | -16.00  | D   |
| 217022_s_at             | IGHA1 / IGHA2 | immunoglobulin heavy constant alpha 1 / alpha 2                                               | -3.48  | D   | -68.59 | D   | -27.86  | D   |
| 209374_s_at             | IGHM          | immunoglobulin heavy constant mu                                                              | -3.03  | D   | -4.00  | D   | -5.28   | D   |
| 212827_at               | IGHM          | immunoglobulin heavy constant mu                                                              | -2.46  | D   | -7.46  | D   | -8.00   | D   |
| 212592_at               | IGJ           | Immunoglobulin J polypeptide, linker protein for immunoglobulin alpha and mu polypeptides     | -3.73  | D   | -9.19  | D   | -8.57   | D   |
| 214677_x_at             | IGL@          | immunoglobulin lambda locus                                                                   | -3.03  | D   | -8.00  | D   | -9.19   | D   |
| 206618_at               | IL18R1        | interleukin 18 receptor 1                                                                     | -3.48  | D   | -4.92  | D   | -2.14   | D   |
| 207072_at               | IL18RAP       | interleukin 18 receptor accessory protein                                                     | -9.19  | D   | -18.38 | D   | -11.31  | D   |
| 205945_at               | IL6R          | interleukin 6 receptor /// interleukin 6 receptor                                             | -4.59  | D   | -2.14  | D   | -14.93  | D   |
| 204863_s_at             | IL6ST         | interleukin 6 signal transducer (gp130, oncostatin M receptor)                                | -3.25  | D   | -3.25  | D   | -4.92   | D   |
| 212195_at               | IL6ST         | Interleukin 6 signal transducer (gp130, oncostatin M receptor)                                | -4.29  | D   | -3.48  | D   | -4.59   | D   |
| 212196_at               | IL6ST         | Interleukin 6 signal transducer (gp130, oncostatin M receptor)                                | -2.83  | D   | -2.64  | D   | -4.59   | D   |
| 205798_at               | IL7R          | interleukin 7 receptor /// interleukin 7 receptor                                             | -8.00  | D   | -16.00 | D   | -18.38  | D   |
| 1555571_at              | IMMP2L        | IMP2 inner mitochondrial membrane peptidase-like (S. cerevisiae)                              | -6.50  | D   | -9.85  | D   | -25.99  | D   |
| 1558409_at              | IMMP2L        | IMP2 inner mitochondrial membrane peptidase-like (S. cerevisiae)                              | -12.13 | D   | -5.66  | D   | -10.56  | D   |
| 1558410_s_at            | IMMP2L        | IMP2 inner mitochondrial membrane peptidase-like (S. cerevisiae)                              | -14.93 | D   | -5.66  | D   | -9.85   | D   |
| 201892_s_at             | IMPDH2        | IMP (inosine monophosphate) dehydrogenase 2                                                   | -3.03  | D   | -3.25  | D   | -4.92   | D   |
| 214705_at               | INADL         | InaD-like (Drosophila)                                                                        | -32.00 | D   | -21.11 | D   | -78.79  | D   |
| 223681_s_at             | INADL         | InaD-like (Drosophila)                                                                        | -16.00 | D   | 128.00 | D   | -24.25  | D   |
| 239173_at               | INADL         | InaD-like (Drosophila)                                                                        | -6.06  | D   | -19.70 | D   | -19.70  | D   |
| 53968_at                | INTS5         | integrator complex subunit 5                                                                  | -2.14  | D   | -2.83  | D   | -2.00   | D   |
| 200995_at               | IPO7          | Importin 7                                                                                    | -2.14  | D   | -2.83  | D   | -2.00   | D   |
| 235613_at               | IQWD1         | IQ motif and WD repeats 1                                                                     | -6.06  | D   | -2.46  | D   | -2.00   | D   |
| 1557174_a_at            | IRAK1BP1      | Interleukin-1 receptor-associated kinase 1 binding protein 1                                  | -3.73  | D   | -45.25 | D   | -2.30   | D   |

| AFFYMETRIX PROBE SET ID | GENE SYMBOL | GENE TITLE                                                           | FC#22  | I/D | FC#2   | I/D | FC#26   | I/D |
|-------------------------|-------------|----------------------------------------------------------------------|--------|-----|--------|-----|---------|-----|
| 244599_at               | ITGA4       | Integrin, alpha 4 (antigen CD49D, alpha 4 subunit of VLA-4 receptor) | -2.46  | D   | -2.00  | D   | -4.92   | D   |
| 201656_at               | ITGA6       | Integrin, alpha 6                                                    | -10.56 | D   | -34.30 | D   | -29.86  | D   |
| 215177_s_at             | ITGA6       | Integrin, alpha 6                                                    | -13.93 | D   | -25.99 | D   | -548.75 | D   |
| 244665_at               | ITGA6       | Integrin, alpha 6                                                    | -27.86 | D   | -90.51 | D   | -10.56  | D   |
| 1554306_at              | ITPKB       | inositol 1,4,5-trisphosphate 3-kinase B                              | -2.30  | D   | -2.64  | D   | -2.00   | D   |
| 1569041_at              | JMJD1C      | Jumonji domain containing 1C                                         | -6.96  | D   | -4.92  | D   | -4.29   | D   |
| 228793_at               | JMJD1C      | jumonji domain containing 1C                                         | -4.29  | D   | -4.29  | D   | -3.25   | D   |
| 241391_at               | JMJD1C      | Jumonji domain containing 1C                                         | -8.00  | D   | -3.03  | D   | -2.30   | D   |
| 236732_at               | JMJD2C      | Jumonji domain containing 2C                                         | -10.56 | D   | -4.29  | D   | -2.46   | D   |
| 224870_at               | KIAA0114    | KIAA0114 gene product                                                | -3.03  | D   | -2.00  | D   | -3.73   | D   |
| 202713_s_at             | KIAA0391    | KIAA0391                                                             | -2.46  | D   | -2.83  | D   | -2.00   | D   |
| 214764_at               | KIAA0507    | KIAA0507                                                             | -5.28  | D   | -8.57  | D   | -2.64   | D   |
| 222920_s_at             | KIAA0748    | KIAA0748                                                             | -4.59  | D   | -8.57  | D   | -4.92   | D   |
| 239946_at               | KIAA0922    | KIAA0922                                                             | -13.00 | D   | -9.85  | D   | -2.83   | D   |
| 205976_at               | KIAA0971    | KIAA0971                                                             | -2.14  | D   | -2.30  | D   | -2.00   | D   |
| 1563455_at              | KIAA0999    | KIAA0999 protein                                                     | -4.29  | D   | -3.03  | D   | -2.14   | D   |
| 225784_s_at             | KIAA1166    | KIAA1166                                                             | -9.85  | D   | -7.46  | D   | -12.13  | D   |
| 235288_at               | KIAA1276    | KIAA1276 protein                                                     | -2.14  | D   | -2.83  | D   | -2.00   | D   |
| 232030_at               | KIAA1632    | KIAA1632                                                             | -2.83  | D   | -3.25  | D   | -2.30   | D   |
| 215750_at               | KIAA1659    | KIAA1659 protein                                                     | -4.29  | D   | -2.83  | D   | -2.46   | D   |
| 235112_at               | KIAA1958    | KIAA1958                                                             | -9.85  | D   | -9.19  | D   | -34.30  | D   |
| 1561763_at              | KIAA2026    | KIAA2026                                                             | -4.59  | D   | -3.73  | D   | -2.14   | D   |
| 203130_s_at             | KIF5C       | kinesin family member 5C                                             | -2.64  | D   | -2.30  | D   | -84.45  | D   |
| 1556461_at              | KLF12       | Kruppel-like factor 12                                               | -2.83  | D   | -8.57  | D   | -4.92   | D   |
| 1556462_a_at            | KLF12       | Kruppel-like factor 12                                               | -4.59  | D   | -6.50  | D   | -2.64   | D   |
| 243089_at               | KLF12       | Kruppel-like factor 12                                               | -7.46  | D   | -10.56 | D   | -3.03   | D   |
| 221838_at               | KLHL22      | kelch-like 22 (Drosophila)                                           | -2.00  | D   | -2.83  | D   | -2.00   | D   |
| 1560397_s_at            | KLHL6       | kelch-like 6 (Drosophila)                                            | -45.25 | D   | -12.13 | D   | -8.57   | D   |
| 228167_at               | KLHL6       | kelch-like 6 (Drosophila)                                            | -4.00  | D   | -3.25  | D   | -7.46   | D   |
| 214039_s_at             | LAPTM4B     | lysosomal associated protein transmembrane 4 beta                    | -5.66  | D   | -6.06  | D   | -111.43 | D   |
| 223161_at               | LCHN        | LCHN protein                                                         | -3.25  | D   | -3.73  | D   | -6.50   | D   |
| 221790_s_at             | LDLRAP1     | low density lipoprotein receptor adaptor protein 1                   | -8.00  | D   | -11.31 | D   | -18.38  | D   |
| 57082_at                | LDLRAP1     | low density lipoprotein receptor adaptor protein 1                   | -6.06  | D   | -6.50  | D   | -13.00  | D   |
| 204454_at               | LDOC1       | leucine zipper, down-regulated in cancer 1                           | -2.64  | D   | -5.28  | D   | -42.22  | D   |
| 210948_s_at             | LEF1        | lymphoid enhancer-binding factor 1                                   | -11.31 | D   | -18.38 | D   | -97.01  | D   |
| 221558_s_at             | LEF1        | lymphoid enhancer-binding factor 1                                   | -14.93 | D   | -19.70 | D   | -51.98  | D   |
| 1564776_at              | LENG10      | leukocyte receptor cluster (LRC) member 10                           | -14.93 | D   | -27.86 | D   | -36.76  | D   |
| 202594_at               | LEPROTL1    | leptin receptor overlapping transcript-like 1                        | -2.46  | D   | -5.28  | D   | -2.46   | D   |
| 202595_s_at             | LEPROTL1    | leptin receptor overlapping transcript-like 1                        | -2.00  | D   | -2.64  | D   | -4.00   | D   |
| 242722_at               | LMO7        | LIM domain 7                                                         | -3.73  | D   | -13.00 | D   | -3.25   | D   |
| 227867_at               | LOC129293   | hypothetical protein LOC129293                                       | -13.00 | D   | -13.93 | D   | -21.11  | D   |
| 225469_at               | LOC144363   | hypothetical protein LOC144363                                       | -2.00  | D   | -2.83  | D   | -2.14   | D   |
| 1564139_at              | LOC144571   | hypothetical protein LOC144571                                       | -45.25 | D   | -4.00  | D   | -29.86  | D   |
| 226764_at               | LOC152485   | hypothetical protein LOC152485                                       | -14.93 | D   | -14.93 | D   | -34.30  | D   |
| 228046_at               | LOC152485   | Hypothetical protein LOC152485                                       | -4.00  | D   | -3.48  | D   | -27.86  | D   |
| 1560703_at              | LOC201229   | hypothetical protein LOC201229                                       | -3.25  | D   | -2.64  | D   | -4.29   | D   |
| 214945_at               | LOC202134   | hypothetical protein LOC202134                                       | -12.13 | D   | -22.63 | D   | -78.79  | D   |
| 236832_at               | LOC221442   | hypothetical LOC221442                                               | -2.64  | D   | -3.25  | D   | -2.14   | D   |
| 235060_at               | LOC23117    | KIAA0220-like protein                                                | -3.73  | D   | -2.14  | D   | -2.46   | D   |
| 222307_at               | LOC282997   | hypothetical protein LOC282997                                       | -4.29  | D   | -3.48  | D   | -6.96   | D   |
| 1556061_at              | LOC283012   | hypothetical protein LOC283012                                       | -2.83  | D   | -4.00  | D   | -2.00   | D   |
| 230245_s_at             | LOC283663   | hypothetical protein LOC283663                                       | -2.30  | D   | -4.92  | D   | -5.28   | D   |
| 232801_at               | LOC375748   | RAD26L hypothetical protein                                          | -4.92  | D   | -7.46  | D   | -2.00   | D   |
| 222368_at               | LOC389634   | Hypothetical LOC389634                                               | -5.28  | D   | -2.64  | D   | -2.46   | D   |
| 239017_at               | LOC389634   | Hypothetical LOC389634                                               | -3.25  | D   | -4.59  | D   | -2.14   | D   |
| 232001_at               | LOC439949   | hypothetical gene supported by AY007155                              | -4.00  | D   | -13.00 | D   | -6.50   | D   |
| 232594_at               | LOC440498   | Hypothetical gene supported by AK001829                              | -9.85  | D   | -6.06  | D   | -3.48   | D   |
| 229872_s_at             | LOC440667   | hypothetical LOC440667                                               | -2.64  | D   | -2.30  | D   | -3.73   | D   |
| 225028_at               | LOC550643   | hypothetical protein LOC550643                                       | -2.00  | D   | -2.83  | D   | -2.00   | D   |
| 243362_s_at             | LOC641518   | hypothetical protein LOC641518                                       | -11.31 | D   | -3.73  | D   | -11.31  | D   |
| 240246_at               | LOC642236   | similar to FRG1 protein (FSHD region gene 1 protein)                 | -5.66  | D   | -8.57  | D   | -2.83   | D   |
| 242770_at               | LOC642236   | similar to FRG1 protein (FSHD region gene 1 protein)                 | -2.14  | D   | -2.14  | D   | -3.25   | D   |

| AFFYMETRIX PROBE SET ID | GENE SYMBOL | GENE TITLE                                                                             | FC#22  | I/D | FC#2   | I/D | FC#26   | I/D |
|-------------------------|-------------|----------------------------------------------------------------------------------------|--------|-----|--------|-----|---------|-----|
| 242577_at               | LOC642398   | hypothetical protein LOC642398                                                         | -3.25  | D   | -9.19  | D   | -4.00   | D   |
| 1559957_a_at            | LOC642852   | hypothetical protein LOC642852                                                         | -3.73  | D   | -7.46  | D   | -2.46   | D   |
| 230064_at               | LOC643473   | Hypothetical protein LOC643473                                                         | -4.59  | D   | -2.64  | D   | -3.25   | D   |
| 241838_at               | LOC644112   | Similar to splicing factor 3b, subunit 4                                               | -3.48  | D   | -3.48  | D   | -3.03   | D   |
| 1558569_at              | LOC645238   | hypothetical protein LOC645238                                                         | -55.72 | D   | -97.01 | D   | -17.15  | D   |
| 227074_at               | LOC646848   | hypothetical protein LOC646848                                                         | -4.92  | D   | -3.03  | D   | -2.14   | D   |
| 228465_at               | LOC646848   | Hypothetical protein LOC646848                                                         | -2.00  | D   | -2.30  | D   | -2.00   | D   |
| 239819_at               | LOC647065   | Hypothetical protein LOC647065                                                         | -2.64  | D   | -2.00  | D   | -2.64   | D   |
| 237825_x_at             | LOC647065   | Hypothetical protein LOC647065                                                         | -2.46  | D   | -4.29  | D   | -3.03   | D   |
| 234852_at               | LOC648859   | hypothetical protein LOC648859                                                         | -4.29  | D   | -2.14  | D   | -13.00  | D   |
| 227984_at               | LOC650392   | Hypothetical protein LOC650392                                                         | -5.28  | D   | -16.00 | D   | -194.01 | D   |
| 1566040_at              | LOC653316   | Hypothetical protein LOC653316                                                         | -51.98 | D   | -25.99 | D   | -34.30  | D   |
| 213166_x_at             | LOC653784   | similar to hypothetical protein FLJ14346                                               | -2.00  | D   | -2.14  | D   | -2.46   | D   |
| 228841_at               | LOC90624    | hypothetical protein LOC90624                                                          | -2.30  | D   | -4.29  | D   | -2.00   | D   |
| 232910_at               | LOC92482    | hypothetical protein LOC92482                                                          | -2.64  | D   | -4.59  | D   | -2.00   | D   |
| 233198_at               | LOC92497    | hypothetical protein LOC92497                                                          | -4.92  | D   | -2.64  | D   | -2.14   | D   |
| 211596_s_at             | LRIG1       | leucine-rich repeats and immunoglobulin-like domains 1                                 | -4.29  | D   | -4.92  | D   | -6.50   | D   |
| 230793_at               | LRRC16      | leucine rich repeat containing 16                                                      | -11.31 | D   | -6.06  | D   | -12.13  | D   |
| 1558517_s_at            | LRRC8C      | Leucine rich repeat containing 8 family, member C                                      | -3.73  | D   | -4.29  | D   | -2.64   | D   |
| 234148_at               | LRRC8D      | Leucine rich repeat containing 8 family, member D                                      | -4.92  | D   | -4.29  | D   | -3.03   | D   |
| 209840_s_at             | LRRN3       | leucine rich repeat neuronal 3                                                         | -64.00 | D   | 445.72 | D   | -891.44 | D   |
| 209841_s_at             | LRRN3       | leucine rich repeat neuronal 3                                                         | -36.76 | D   | -59.71 | D   | -955.43 | D   |
| 207339_s_at             | LTB         | lymphotoxin beta (TNF superfamily, member 3)                                           | -4.59  | D   | -11.31 | D   | -25.99  | D   |
| 219922_s_at             | LTBP3       | latent transforming growth factor beta binding protein 3                               | -5.66  | D   | -4.59  | D   | -7.46   | D   |
| 230174_at               | LYPLAL1     | Lysophospholipase-like 1                                                               | -2.00  | D   | -2.30  | D   | -2.30   | D   |
| 244878_at               | MAGED1      | Melanoma antigen family D, 1                                                           | -8.00  | D   | -6.50  | D   | -2.46   | D   |
| 244450_at               | MAK         | Male germ cell-associated kinase                                                       | -16.00 | D   | -4.00  | D   | -2.83   | D   |
| 204777_s_at             | MAL         | mal, T-cell differentiation protein                                                    | -10.56 | D   | -24.25 | D   | -24.25  | D   |
| 1570299_at              | MAML2       | Mastermind-like 2 (Drosophila)                                                         | -3.25  | D   | -9.19  | D   | -9.19   | D   |
| 232333_at               | MAML2       | Mastermind-like 2 (Drosophila)                                                         | -24.25 | D   | -16.00 | D   | -9.19   | D   |
| 234645_at               | MAML2       | Mastermind-like 2 (Drosophila)                                                         | -13.93 | D   | -7.46  | D   | -7.46   | D   |
| 235106_at               | MAML2       | mastermind-like 2 (Drosophila)                                                         | -2.83  | D   | -2.30  | D   | -3.03   | D   |
| 235457_at               | MAML2       | mastermind-like 2 (Drosophila)                                                         | -5.28  | D   | -4.92  | D   | -4.59   | D   |
| 242405_at               | MAML2       | Mastermind-like 2 (Drosophila)                                                         | -22.63 | D   | -11.31 | D   | -9.85   | D   |
| 244414_at               | MAML2       | Mastermind-like 2 (Drosophila)                                                         | -25.99 | D   | -18.38 | D   | -12.13  | D   |
| 218918_at               | MAN1C1      | mannosidase, alpha, class 1C, member 1                                                 | -10.56 | D   | -5.28  | D   | -27.86  | D   |
| 243030_at               | MAP3K1      | Mitogen-activated protein kinase kinase kinase 1                                       | -5.28  | D   | -3.25  | D   | -3.25   | D   |
| 226190_at               | MAP3K13     | Mitogen-activated protein kinase kinase kinase 13                                      | -2.83  | D   | -2.30  | D   | -4.29   | D   |
| 1565889_at              | MAP3K7IP2   | Mitogen-activated protein kinase kinase kinase 7 interacting protein 2                 | -4.59  | D   | -3.48  | D   | -2.14   | D   |
| 244846_at               | MAP4K4      | Mitogen-activated protein kinase kinase kinase 4                                       | -2.83  | D   | -2.83  | D   | -2.30   | D   |
| 1556657_at              | MBNL1       | Muscleblind-like (Drosophila)                                                          | -10.56 | D   | -13.93 | D   | -2.00   | D   |
| 1556658_a_at            | MBNL1       | Muscleblind-like (Drosophila)                                                          | -8.57  | D   | -8.00  | D   | -2.14   | D   |
| 235811_at               | MBNL1       | Muscleblind-like (Drosophila)                                                          | -6.06  | D   | -10.56 | D   | -4.29   | D   |
| 236558_at               | MBNL1       | Muscleblind-like (Drosophila)                                                          | -13.00 | D   | -19.70 | D   | -4.00   | D   |
| 238558_at               | MBNL1       | Muscleblind-like (Drosophila)                                                          | -6.06  | D   | -8.57  | D   | -2.46   | D   |
| 226225_at               | MCC         | mutated in colorectal cancers                                                          | -6.96  | D   | -9.19  | D   | -16.00  | D   |
| 233231_at               | MCCC2       | Methylcrotonoyl-Coenzyme A carboxylase 2 (beta)                                        | -7.46  | D   | -4.00  | D   | -2.46   | D   |
| 1569484_s_at            | MDN1        | MDN1, midasin homolog (yeast)                                                          | -7.46  | D   | -6.96  | D   | -2.83   | D   |
| 1562731_s_at            | MDS2        | myelodysplastic syndrome 2 translocation associated                                    | -4.29  | D   | -2.64  | D   | -5.66   | D   |
| 239571_at               | MEF2A       | MADS box transcription enhancer factor 2, polypeptide A                                | -4.00  | D   | -2.64  | D   | -2.46   | D   |
| 202016_at               | MEST        | mesoderm specific transcript homolog (mouse)                                           | -9.19  | D   | -12.13 | D   | -7.46   | D   |
| 213457_at               | MFHAS1      | malignant fibrous histiocytoma amplified sequence 1                                    | -4.59  | D   | -4.29  | D   | -17.15  | D   |
| 1569136_at              | MGAT4A      | Mannosyl (alpha-1,3-)-glycoprotein beta-1,4-N-acetylglucosaminyltransferase, isozyme A | -2.46  | D   | -4.59  | D   | -5.66   | D   |
| 215528_at               | MGAT5       | Mannosyl (alpha-1,6-)-glycoprotein beta-1,6-N-acetylglucosaminyltransferase            | -11.31 | D   | -4.59  | D   | -4.00   | D   |
| 1554609_at              | MGC12965    | similar to Cytochrome c, somatic                                                       | -2.64  | D   | -3.48  | D   | -2.00   | D   |
| 221756_at               | MGC17330    | HGFL gene /// HGFL gene                                                                | -5.66  | D   | -5.28  | D   | -5.66   | D   |
| 221757_at               | MGC17330    | HGFL gene /// HGFL gene                                                                | -4.59  | D   | -3.48  | D   | -9.19   | D   |
| 225330_at               | MGC18216    | hypothetical protein MGC18216                                                          | -4.29  | D   | -4.92  | D   | -7.46   | D   |
| 238365_s_at             | MGC33556    | hypothetical LOC339541                                                                 | -3.25  | D   | -2.83  | D   | -9.19   | D   |
| 242520_s_at             | MGC33556    | hypothetical LOC339541                                                                 | -8.57  | D   | -3.25  | D   | -59.71  | D   |
| 1556373_a_at            | MGC35361    | Hypothetical protein MGC35361                                                          | -2.64  | D   | -2.64  | D   | -2.00   | D   |

| AFFYMETRIX PROBE SET ID | GENE SYMBOL | GENE TITLE                                                                  | FC#22  | I/D | FC#2   | I/D | FC#26   | I/D |
|-------------------------|-------------|-----------------------------------------------------------------------------|--------|-----|--------|-----|---------|-----|
| 243602_at               | MGC40069    | Hypothetical protein MGC40069                                               | -5.28  | D   | -8.57  | D   | -12.13  | D   |
| 237033_at               | MGC52498    | hypothetical protein MGC52498                                               | -2.64  | D   | -3.03  | D   | -2.30   | D   |
| 222306_at               | MGC61571    | Hypothetical protein MGC61571                                               | -4.59  | D   | -3.03  | D   | -3.03   | D   |
| 244740_at               | MGC9913     | hypothetical protein MGC9913                                                | -13.93 | D   | -11.31 | D   | -13.00  | D   |
| 244741_s_at             | MGC9913     | hypothetical protein MGC9913                                                | -6.50  | D   | -19.70 | D   | -12.13  | D   |
| 213188_s_at             | MINA        | MYC induced nuclear antigen                                                 | -2.83  | D   | -3.03  | D   | -3.03   | D   |
| 213189_at               | MINA        | MYC induced nuclear antigen                                                 | -2.83  | D   | -3.48  | D   | -3.48   | D   |
| 218259_at               | MKL2        | MKL/myocardin-like 2                                                        | -6.50  | D   | -2.83  | D   | -2.83   | D   |
| 233219_at               | MKLN1       | Muskelin 1, intracellular mediator containing kelch motifs                  | -3.03  | D   | -4.00  | D   | -2.46   | D   |
| 1569652_at              | MLLT3       | Myeloid/lymphoid or mixed-lineage leukemia                                  | -3.03  | D   | -3.03  | D   | -3.03   | D   |
| 225157_at               | MLXIP       | MLX interacting protein                                                     | -3.48  | D   | -2.14  | D   | -3.48   | D   |
| 203956_at               | MORC2       | MORC family CW-type zinc finger 2                                           | -4.59  | D   | -7.46  | D   | -2.83   | D   |
| 216863_s_at             | MORC2       | MORC family CW-type zinc finger 2                                           | -3.48  | D   | -5.28  | D   | -3.03   | D   |
| 226092_at               | MPP5        | membrane protein, palmitoylated 5 (MAGUK p55 subfamily member 5)            | -6.06  | D   | -2.30  | D   | -2.00   | D   |
| 238451_at               | MPP7        | membrane protein, palmitoylated 7 (MAGUK p55 subfamily member 7)            | -3.73  | D   | -2.30  | D   | -13.93  | D   |
| 238778_at               | MPP7        | membrane protein, palmitoylated 7 (MAGUK p55 subfamily member 7)            | -3.73  | D   | -2.46  | D   | -25.99  | D   |
| 236955_at               | MRPS28      | Mitochondrial ribosomal protein S28                                         | -9.19  | D   | -6.96  | D   | -6.50   | D   |
| 218654_s_at             | MRPS33      | mitochondrial ribosomal protein S33                                         | -2.46  | D   | -2.83  | D   | -2.00   | D   |
| 228592_at               | MS4A1       | membrane-spanning 4-domains, subfamily A, member 1                          | -2.30  | D   | -21.11 | D   | -4.29   | D   |
| 1553132_a_at            | MTAC2D1     | membrane targeting (tandem) C2 domain containing 1                          | -3.03  | D   | -2.64  | D   | -16.00  | D   |
| 234970_at               | MTAC2D1     | membrane targeting (tandem) C2 domain containing 1                          | -3.48  | D   | -4.29  | D   | -8.57   | D   |
| 1557965_at              | MTERFD2     | MTERF domain containing 2                                                   | -2.64  | D   | -2.83  | D   | -2.83   | D   |
| 1557966_x_at            | MTERFD2     | MTERF domain containing 2                                                   | -2.46  | D   | -3.03  | D   | -2.46   | D   |
| 230444_at               | MTFR1       | Mitochondrial fission regulator 1                                           | -4.29  | D   | -4.29  | D   | -4.59   | D   |
| 239846_at               | MTHFD1      | Methylenetetrahydrofolate dehydrogenase (NADP+ dependent) 1                 | -3.48  | D   | -4.29  | D   | -2.00   | D   |
| 36920_at                | MTM1        | myotubularin 1                                                              | -2.30  | D   | -2.00  | D   | -3.03   | D   |
| 212096_s_at             | MTUS1       | mitochondrial tumor suppressor 1                                            | -9.85  | D   | -4.59  | D   | -32.00  | D   |
| 213906_at               | MYBL1       | v-myb myeloblastosis viral oncogene homolog (avian)-like 1                  | -2.00  | D   | -3.03  | D   | -2.30   | D   |
| 202431_s_at             | MYC         | v-myc myelocytomatosis viral oncogene homolog (avian)                       | -10.56 | D   | -27.86 | D   | -39.40  | D   |
| 222771_s_at             | MYEF2       | myelin expression factor 2                                                  | -4.92  | D   | -3.48  | D   | -39.40  | D   |
| 231996_at               | N4BP2       | Nedd4 binding protein 2                                                     | -3.25  | D   | -3.25  | D   | -2.14   | D   |
| 208754_s_at             | NAP1L1      | nucleosome assembly protein 1-like 1                                        | -2.14  | D   | -2.00  | D   | -3.25   | D   |
| 219368_at               | NAP1L2      | nucleosome assembly protein 1-like 2                                        | -6.50  | D   | -2.46  | D   | -2.14   | D   |
| 204749_at               | NAP1L3      | nucleosome assembly protein 1-like 3                                        | -2.30  | D   | -3.48  | D   | -5.66   | D   |
| 219378_at               | NARG1L      | NMDA receptor regulated 1-like                                              | -2.00  | D   | -2.46  | D   | -2.30   | D   |
| 242191_at               | NBPF11      | neuroblastoma breakpoint family, member 11                                  | -4.59  | D   | -3.03  | D   | -4.00   | D   |
| 203315_at               | NCK2        | NCK adaptor protein 2                                                       | -3.03  | D   | -3.25  | D   | -5.66   | D   |
| 232583_at               | NCK2        | NCK adaptor protein 2                                                       | -12.13 | D   | -29.86 | D   | -8.57   | D   |
| 211352_s_at             | NCOA3       | nuclear receptor coactivator 3                                              | -2.64  | D   | -2.30  | D   | -2.00   | D   |
| 222423_at               | NDFIP1      | Nedd4 family interacting protein 1                                          | -2.46  | D   | -3.03  | D   | -2.14   | D   |
| 203413_at               | NELL2       | NEL-like 2 (chicken) /// NEL-like 2 (chicken)                               | -18.38 | D   | -24.25 | D   | -59.71  | D   |
| 239876_at               | NFKB1       | Nuclear factor of kappa light polypeptide gene enhancer in B-cells 1 (p105) | -5.66  | D   | -3.48  | D   | -3.48   | D   |
| 217963_s_at             | NGFRAP1     | nerve growth factor receptor (TNFRSF16) associated protein 1                | -3.48  | D   | -3.48  | D   | -22.63  | D   |
| 229963_at               | NGFRAP1L1   | NGFRAP1-like 1                                                              | -6.96  | D   | -9.85  | D   | -194.01 | D   |
| 231235_at               | NKTR        | natural killer-tumor recognition sequence                                   | -3.03  | D   | -3.03  | D   | -7.46   | D   |
| 205005_s_at             | NMT2        | N-myristoyltransferase 2                                                    | -2.14  | D   | -2.46  | D   | -2.30   | D   |
| 215743_at               | NMT2        | N-myristoyltransferase 2                                                    | -4.29  | D   | -5.66  | D   | -2.83   | D   |
| 231798_at               | NOG         | Noggin                                                                      | -21.11 | D   | -16.00 | D   | -294.07 | D   |
| 1554082_a_at            | NOL9        | nucleolar protein 9                                                         | -2.00  | D   | -2.14  | D   | -2.30   | D   |
| 217950_at               | NOSIP       | nitric oxide synthase interacting protein                                   | -4.59  | D   | -4.92  | D   | -6.06   | D   |
| 201695_s_at             | NP          | nucleoside phosphorylase                                                    | -2.00  | D   | -2.64  | D   | -2.83   | D   |
| 39549_at                | NPAS2       | neuronal PAS domain protein 2                                               | -4.00  | D   | -24.25 | D   | -22.63  | D   |
| 235432_at               | NPHP3       | nephronophthisis 3 (adolescent)                                             | -2.00  | D   | -2.83  | D   | -2.64   | D   |
| 209750_at               | NR1D2       | nuclear receptor subfamily 1, group D, member 2                             | -2.30  | D   | -2.30  | D   | -2.00   | D   |
| 1564236_at              | NR3C2       | Nuclear receptor subfamily 3, group C, member 2                             | 128.00 | D   | 103.97 | D   | -19.70  | D   |
| 205259_at               | NR3C2       | nuclear receptor subfamily 3, group C, member 2                             | -14.93 | D   | -16.00 | D   | -7.46   | D   |
| 239673_at               | NR3C2       | Nuclear receptor subfamily 3, group C, member 2                             | -24.25 | D   | -22.63 | D   | -14.93  | D   |
| 204105_s_at             | NRCAM       | neuronal cell adhesion molecule                                             | -84.45 | D   | -21.11 | D   | -5.66   | D   |
| 202599_s_at             | NRIP1       | nuclear receptor interacting protein 1                                      | -4.00  | D   | -2.30  | D   | -51.98  | D   |
| 202600_s_at             | NRIP1       | nuclear receptor interacting protein 1                                      | -5.66  | D   | -2.00  | D   | -59.71  | D   |
| 1569180_at              | NSF         | N-ethylmaleimide-sensitive factor                                           | -5.28  | D   | -2.83  | D   | -2.14   | D   |



| AFFYMETRIX PROBE SET ID | GENE SYMBOL | GENE TITLE                                                                   | FC#22  | I/D | FC#2   | I/D | FC#26   | I/D |
|-------------------------|-------------|------------------------------------------------------------------------------|--------|-----|--------|-----|---------|-----|
| 1569181_x_at            | NSF         | N-ethylmaleimide-sensitive factor                                            | -5.66  | D   | -2.64  | D   | -2.14   | D   |
| 242239_at               | NSUN6       | NOL1/NOP2/Sun domain family, member 6                                        | -3.03  | D   | -2.64  | D   | -2.46   | D   |
| 223178_s_at             | NT5DC1      | 5'-nucleotidase domain containing 1                                          | -2.00  | D   | -2.00  | D   | -2.30   | D   |
| 1553994_at              | NT5E        | 5'-nucleotidase, ecto (CD73)                                                 | -11.31 | D   | -13.00 | D   | -78.79  | D   |
| 1553995_a_at            | NT5E        | 5'-nucleotidase, ecto (CD73)                                                 | -25.99 | D   | -17.15 | D   | -78.79  | D   |
| 203939_at               | NT5E        | 5'-nucleotidase, ecto (CD73)                                                 | -22.63 | D   | -45.25 | D   | -64.00  | D   |
| 227486_at               | NT5E        | 5'-nucleotidase, ecto (CD73)                                                 | -24.25 | D   | -24.25 | D   | -25.99  | D   |
| 240824_at               | OBFC1       | Oligonucleotide/oligosaccharide-binding fold containing 1                    | -7.46  | D   | -10.56 | D   | -3.25   | D   |
| 1555890_at              | OR2A7       | Olfactory receptor, family 2, subfamily A, member 7                          | -5.28  | D   | -11.31 | D   | -25.99  | D   |
| 1563051_at              | OSBP        | oxysterol binding protein                                                    | -2.30  | D   | -2.14  | D   | -2.14   | D   |
| 215262_at               | OXNAD1      | Oxidoreductase NAD-binding domain containing 1                               | -19.70 | D   | -14.93 | D   | -119.43 | D   |
| 227686_at               | OXNAD1      | oxidoreductase NAD-binding domain containing 1                               | -9.19  | D   | -13.00 | D   | -22.63  | D   |
| 231502_at               | P15RS       | Hypothetical protein FLJ10656                                                | -4.00  | D   | -3.73  | D   | -2.30   | D   |
| 210448_s_at             | P2RX5       | purinergic receptor P2X, ligand-gated ion channel, 5                         | -3.73  | D   | -6.06  | D   | -7.46   | D   |
| 206637_at               | P2RY14      | purinergic receptor P2Y, G-protein coupled, 14                               | -2.14  | D   | -3.03  | D   | -6.96   | D   |
| 225626_at               | PAG1        | phosphoprotein associated with glycosphingolipid microdomains 1              | -6.06  | D   | -8.00  | D   | -4.00   | D   |
| 227354_at               | PAG1        | phosphoprotein associated with glycosphingolipid microdomains 1              | -4.92  | D   | -6.06  | D   | -6.50   | D   |
| 201013_s_at             | PAICS       | phosphoribosylaminoimidazole carboxylase                                     | -3.25  | D   | -3.48  | D   | -4.00   | D   |
| 239597_at               | PAN3        | PAN3 polyA specific ribonuclease subunit homolog (S. cerevisiae)             | -5.66  | D   | -3.48  | D   | -2.00   | D   |
| 243233_at               | PAN3        | PAN3 polyA specific ribonuclease subunit homolog (S. cerevisiae)             | -7.46  | D   | -4.59  | D   | -2.83   | D   |
| 240141_at               | PAPD4       | PAP associated domain containing 4                                           | -3.25  | D   | -2.64  | D   | -3.48   | D   |
| 227626_at               | PAQR8       | progesterin and adipoQ receptor family member VIII                           | -5.28  | D   | -5.66  | D   | -6.96   | D   |
| 213534_s_at             | PASK        | PAS domain containing serine/threonine kinase                                | -8.57  | D   | -9.85  | D   | -12.13  | D   |
| 216945_x_at             | PASK        | PAS domain containing serine/threonine kinase                                | -9.19  | D   | -10.56 | D   | -12.13  | D   |
| 212259_s_at             | PBXIP1      | pre-B-cell leukemia transcription factor interacting protein 1               | -2.14  | D   | -2.00  | D   | -2.14   | D   |
| 214177_s_at             | PBXIP1      | pre-B-cell leukemia transcription factor interacting protein 1               | -3.03  | D   | -4.00  | D   | -2.46   | D   |
| 241956_at               | PCGF5       | Polycomb group ring finger 5                                                 | -3.03  | D   | -2.30  | D   | -2.30   | D   |
| 238902_at               | PCMTD1      | Protein-L-isoaspartate (D-aspartate) O-methyltransferase domain containing 1 | -3.48  | D   | -4.00  | D   | -2.46   | D   |
| 237577_at               | PCNP        | PEST proteolytic signal containing nuclear protein                           | -2.30  | D   | -2.46  | D   | -3.73   | D   |
| 215175_at               | PCNX        | pecanex homolog (Drosophila)                                                 | -4.59  | D   | -2.64  | D   | -2.64   | D   |
| 237459_at               | PCTK2       | PCTAIRE protein kinase 2                                                     | -4.29  | D   | -2.83  | D   | -2.00   | D   |
| 212594_at               | PDCC4       | programmed cell death 4 (neoplastic transformation inhibitor)                | -2.30  | D   | -2.83  | D   | -2.64   | D   |
| 214582_at               | PDE3B       | phosphodiesterase 3B, cGMP-inhibited                                         | -13.00 | D   | -8.57  | D   | -51.98  | D   |
| 222317_at               | PDE3B       | Phosphodiesterase 3B, cGMP-inhibited                                         | -24.25 | D   | -14.93 | D   | -42.22  | D   |
| 222330_at               | PDE3B       | Phosphodiesterase 3B, cGMP-inhibited                                         | -25.99 | D   | -36.76 | D   | -48.50  | D   |
| 203708_at               | PDE4B       | phosphodiesterase 4A, cAMP-specific                                          | -5.28  | D   | -2.46  | D   | -24.25  | D   |
| 213388_at               | PDE4DIP     | phosphodiesterase 4D interacting protein (myomegalin)                        | -2.30  | D   | -4.00  | D   | -2.00   | D   |
| 1552343_s_at            | PDE7A       | phosphodiesterase 7A                                                         | -6.50  | D   | -11.31 | D   | -5.28   | D   |
| 224046_s_at             | PDE7A       | phosphodiesterase 7A                                                         | -4.00  | D   | -4.59  | D   | -6.96   | D   |
| 226452_at               | PDK1        | pyruvate dehydrogenase kinase, isozyme 1                                     | -3.73  | D   | -4.92  | D   | -4.29   | D   |
| 239798_at               | PDK1        | Pyruvate dehydrogenase kinase, isozyme 1                                     | -12.13 | D   | -9.19  | D   | -6.50   | D   |
| 235547_at               | PFAAP5      | Phosphonoformate immuno-associated protein 5                                 | -3.25  | D   | -2.30  | D   | -2.64   | D   |
| 213302_at               | PFAS        | phosphoribosylformylglycinamide synthase (FGAR amidotransferase)             | -3.25  | D   | -3.73  | D   | -3.73   | D   |
| 220576_at               | PGAP1       | GPI deacylase                                                                | -5.66  | D   | -3.48  | D   | -3.48   | D   |
| 229553_at               | PGM2L1      | phosphoglucomutase 2-like 1                                                  | -2.83  | D   | -3.48  | D   | -2.64   | D   |
| 242277_at               | PHACTR2     | Phosphatase and actin regulator 2                                            | -3.03  | D   | -2.64  | D   | -4.92   | D   |
| 244774_at               | PHACTR2     | Phosphatase and actin regulator 2                                            | -8.00  | D   | -4.00  | D   | -48.50  | D   |
| 244791_at               | PHGDHL1     | Phosphoglycerate dehydrogenase like 1                                        | -8.00  | D   | -6.96  | D   | -2.46   | D   |
| 235107_at               | PIAS2       | Protein inhibitor of activated STAT, 2                                       | -2.83  | D   | -4.29  | D   | -2.14   | D   |
| 244633_at               | PIAS2       | Protein inhibitor of activated STAT, 2                                       | -4.29  | D   | -4.29  | D   | -2.00   | D   |
| 232262_at               | PIGL        | phosphatidylinositol glycan, class L                                         | -2.30  | D   | -3.48  | D   | -4.29   | D   |
| 215212_at               | PIK3CA      | Phosphoinositide-3-kinase, catalytic, alpha polypeptide                      | -5.28  | D   | -3.73  | D   | -3.03   | D   |
| 212249_at               | PIK3R1      | phosphoinositide-3-kinase, regulatory subunit 1 (p85 alpha)                  | -2.64  | D   | -2.00  | D   | -2.83   | D   |
| 244181_at               | PIK3R1      | Phosphoinositide-3-kinase, regulatory subunit 1 (p85 alpha)                  | -3.03  | D   | -4.00  | D   | -4.92   | D   |
| 241155_at               | PIP5K2A     | Phosphatidylinositol-4-phosphate 5-kinase, type II, alpha                    | -3.48  | D   | -5.66  | D   | -3.03   | D   |
| 239808_at               | PITPNC1     | Phosphatidylinositol transfer protein, cytoplasmic 1                         | -2.14  | D   | -3.48  | D   | -2.00   | D   |
| 1563217_at              | PKIA        | Protein kinase (cAMP-dependent, catalytic) inhibitor alpha                   | -13.00 | D   | -36.76 | D   | -238.86 | D   |
| 204612_at               | PKIA        | protein kinase (cAMP-dependent, catalytic) inhibitor alpha                   | -6.50  | D   | -6.06  | D   | -45.25  | D   |
| 226864_at               | PKIA        | Protein kinase (cAMP-dependent, catalytic) inhibitor alpha                   | -32.00 | D   | -3.73  | D   | -78.79  | D   |
| 202732_at               | PKIG        | protein kinase (cAMP-dependent, catalytic) inhibitor gamma                   | -3.03  | D   | -6.96  | D   | -4.29   | D   |
| 205372_at               | PLAG1       | pleiomorphic adenoma gene 1                                                  | -4.92  | D   | -4.92  | D   | -48.50  | D   |
| 244726_at               | PLCB1       | Phospholipase C, beta 1 (phosphoinositide-specific)                          | -5.28  | D   | -4.29  | D   | -45.25  | D   |

| AFFYMETRIX PROBE SET ID | GENE SYMBOL  | GENE TITLE                                                              | FC#22  | I/D | FC#2   | I/D | FC#26  | I/D |
|-------------------------|--------------|-------------------------------------------------------------------------|--------|-----|--------|-----|--------|-----|
| 209504_s_at             | PLEKHB1      | pleckstrin homology domain containing, family B (evectins) member 1     | -4.00  | D   | -4.29  | D   | -8.00  | D   |
| 205871_at               | PLGLB2       | plasminogen-like B2                                                     | -2.30  | D   | -4.29  | D   | -3.48  | D   |
| 205190_at               | PLS1         | plastin 1 (I isoform)                                                   | -6.06  | D   | -2.00  | D   | -36.76 | D   |
| 219700_at               | PLXDC1       | plexin domain containing 1                                              | -17.15 | D   | -9.19  | D   | -9.85  | D   |
| 222490_at               | POLR3E       | polymerase (RNA) III (DNA directed) polypeptide E (80kD)                | -2.46  | D   | -2.46  | D   | -2.83  | D   |
| 1562280_at              | POU2F1       | POU domain, class 2, transcription factor 1                             | -4.29  | D   | -9.85  | D   | -2.00  | D   |
| 37152_at                | PPARD        | peroxisome proliferative activated receptor, delta                      | -2.64  | D   | -2.14  | D   | -2.46  | D   |
| 236999_at               | PPWD1        | Peptidylprolyl isomerase domain and WD repeat containing 1              | -3.73  | D   | -3.03  | D   | -2.64  | D   |
| 213093_at               | PRKCA        | protein kinase C, alpha                                                 | -8.00  | D   | -9.19  | D   | -7.46  | D   |
| 216069_at               | PRMT2        | Protein arginine methyltransferase 2                                    | -4.29  | D   | -4.00  | D   | -3.03  | D   |
| 228722_at               | PRMT2        | protein arginine methyltransferase 2                                    | -3.25  | D   | -4.29  | D   | -3.25  | D   |
| 231735_s_at             | PRO1073      | PRO1073 protein                                                         | -2.64  | D   | -2.30  | D   | -2.00  | D   |
| 226610_at               | PRR6         | proline rich 6                                                          | -2.64  | D   | -12.13 | D   | -6.06  | D   |
| 226611_s_at             | PRR6         | proline rich 6                                                          | -3.25  | D   | -4.59  | D   | -2.64  | D   |
| 234865_at               | PRSS1        | Protease, serine, 1 (trypsin 1)                                         | -4.00  | D   | -4.00  | D   | -24.25 | D   |
| 243997_x_at             | PSPC1        | Paraspeckle component 1                                                 | -6.06  | D   | -3.73  | D   | -2.64  | D   |
| 233314_at               | PTEN         | phosphatase and tensin homolog (mutated in multiple advanced cancers 1) | -3.25  | D   | -4.59  | D   | -2.83  | D   |
| 1568898_at              | PTPRK        | Protein tyrosine phosphatase, receptor type, K                          | -36.76 | D   | -9.19  | D   | -18.38 | D   |
| 203038_at               | PTPRK        | protein tyrosine phosphatase, receptor type, K                          | -9.19  | D   | -6.96  | D   | -7.46  | D   |
| 218984_at               | PUS7         | pseudouridylate synthase 7 homolog (S. cerevisiae)                      | -2.14  | D   | -4.00  | D   | -3.48  | D   |
| 221974_at               | PWCR1        | Prader-Willi syndrome chromosome region 1                               | -3.48  | D   | -4.92  | D   | -3.73  | D   |
| 233089_at               | QRSL1        | glutamyl-tRNA synthase (glutamine-hydrolyzing)-like 1                   | -2.30  | D   | -2.64  | D   | -2.00  | D   |
| 229398_at               | RAB18        | RAB18, member RAS oncogene family                                       | -2.64  | D   | -2.64  | D   | -2.00  | D   |
| 213531_s_at             | RAB3GAP1     | RAB3 GTPase activating protein subunit 1 (catalytic)                    | -6.06  | D   | -4.29  | D   | -9.85  | D   |
| 223471_at               | RAB3IP       | RAB3A interacting protein (rabin3)                                      | -5.28  | D   | -4.59  | D   | -6.50  | D   |
| 238853_at               | RAB3IP       | RAB3A interacting protein (rabin3)                                      | -9.19  | D   | -8.57  | D   | -29.86 | D   |
| 225632_s_at             | RAB43        | RAB43, member RAS oncogene family                                       | -3.73  | D   | -3.03  | D   | -2.83  | D   |
| 1557738_at              | RAB6IP2      | RAB6 interacting protein 2                                              | -6.06  | D   | -5.28  | D   | -6.96  | D   |
| 232565_at               | RAB6IP2      | RAB6 interacting protein 2                                              | -45.25 | D   | -24.25 | D   | -4.29  | D   |
| 242737_at               | RAD51L1      | RAD51-like 1 (S. cerevisiae)                                            | -10.56 | D   | -6.50  | D   | -2.30  | D   |
| 244813_at               | RAD51L1      | RAD51-like 1 (S. cerevisiae)                                            | -2.64  | D   | -2.30  | D   | -2.46  | D   |
| 235846_at               | RAD54B       | RAD54 homolog B (S. cerevisiae)                                         | -4.00  | D   | -14.93 | D   | -39.40 | D   |
| 227224_at               | RALGPS2      | Ral GEF with PH domain and SH3 binding motif 2                          | -2.30  | D   | -12.13 | D   | -24.25 | D   |
| 227533_at               | RALGPS2      | Ral GEF with PH domain and SH3 binding motif 2                          | -2.83  | D   | -4.29  | D   | -64.00 | D   |
| 230078_at               | RAPGEF6      | Rap guanine nucleotide exchange factor (GEF) 6                          | -2.30  | D   | -4.00  | D   | -2.00  | D   |
| 239646_at               | RAPGEF6      | Rap guanine nucleotide exchange factor (GEF) 6                          | -8.00  | D   | -9.19  | D   | -3.03  | D   |
| 231075_x_at             | RAPH1        | Ras association (RalGDS/AF-6) and pleckstrin homology domains 1         | -2.14  | D   | -2.64  | D   | -2.46  | D   |
| 1553185_at              | RASEF        | RAS and EF-hand domain containing                                       | -4.92  | D   | -3.25  | D   | -2.30  | D   |
| 1553186_x_at            | RASEF        | RAS and EF-hand domain containing                                       | -3.25  | D   | -2.46  | D   | -2.30  | D   |
| 228109_at               | RASGRF2      | Ras protein-specific guanine nucleotide-releasing factor 2              | -16.00 | D   | -21.11 | D   | -9.85  | D   |
| 212332_at               | RBL2         | retinoblastoma-like 2 (p130)                                            | -2.30  | D   | -3.25  | D   | -2.00  | D   |
| 238185_at               | RBMS1        | RNA binding motif, single stranded interacting protein 1                | -3.73  | D   | -5.66  | D   | -2.30  | D   |
| 238281_at               | RBMS1        | RNA binding motif, single stranded interacting protein 1                | -4.00  | D   | -3.03  | D   | -8.00  | D   |
| 223447_at               | REG4         | regenerating islet-derived family, member 4                             | -16.00 | D   | -3.48  | D   | -6.96  | D   |
| 244625_at               | RERE         | Arginine-glutamic acid dipeptide (RE) repeats                           | -19.70 | D   | -3.73  | D   | -2.64  | D   |
| 232963_at               | RFWD2        | Ring finger and WD repeat domain 2                                      | -3.25  | D   | -2.64  | D   | -2.64  | D   |
| 217671_at               | RFX3         | Regulatory factor X, 3 (influences HLA class II expression)             | -8.00  | D   | -9.85  | D   | -2.83  | D   |
| 232791_at               | RFX3         | Regulatory factor X, 3 (influences HLA class II expression)             | -3.48  | D   | -51.98 | D   | -4.92  | D   |
| 218723_s_at             | RGC32        | response gene to complement 32                                          | -6.96  | D   | -4.29  | D   | -10.56 | D   |
| 210676_x_at             | RGPD5        | RANBP2-like and GRIP domain containing 5                                | -2.46  | D   | -2.46  | D   | -2.00  | D   |
| 204319_s_at             | RGS10        | regulator of G-protein signalling 10                                    | -3.73  | D   | -2.83  | D   | -8.57  | D   |
| 216166_at               | RHOH         | Ras homolog gene family, member H                                       | -6.50  | D   | -4.29  | D   | -2.00  | D   |
| 204951_at               | RHOH         | ras homolog gene family, member H                                       | -3.48  | D   | -11.31 | D   | -3.25  | D   |
| 236293_at               | RHOH         | Ras homolog gene family, member H                                       | -7.46  | D   | -6.50  | D   | -3.03  | D   |
| 214519_s_at             | RLN2         | relaxin 2                                                               | -4.29  | D   | -4.59  | D   | -73.52 | D   |
| 1565544_at              | RNF141       | ring finger protein 141                                                 | -48.50 | D   | -32.00 | D   | -21.11 | D   |
| 226433_at               | RNF157       | ring finger protein 157                                                 | -3.03  | D   | -4.00  | D   | -3.48  | D   |
| 230776_at               | RNF157       | Ring finger protein 157                                                 | -7.46  | D   | -25.99 | D   | -3.25  | D   |
| 213194_at               | ROBO1        | roundabout, axon guidance receptor, homolog 1 (Drosophila)              | -4.92  | D   | -3.25  | D   | -7.46  | D   |
| 237733_at               | RP11-125A7.3 | KIAA0564 protein                                                        | -2.83  | D   | -9.85  | D   | -2.64  | D   |
| 215321_at               | RPIB9        | Rap2-binding protein 9                                                  | -3.25  | D   | -3.03  | D   | -13.93 | D   |
| 229590_at               | RPL13        | Ribosomal protein L13                                                   | -3.48  | D   | -2.14  | D   | -6.06  | D   |

| AFFYMETRIX PROBE SET ID | GENE SYMBOL | GENE TITLE                                                                                      | FC#22  | I/D | FC#2   | I/D | FC#26   | I/D |
|-------------------------|-------------|-------------------------------------------------------------------------------------------------|--------|-----|--------|-----|---------|-----|
| 221593_s_at             | RPL31       | ribosomal protein L31                                                                           | -2.64  | D   | -2.14  | D   | -3.73   | D   |
| 200962_at               | RPL31       | ribosomal protein L31 /// similar to ribosomal protein L31                                      | -2.14  | D   | -3.48  | D   | -7.46   | D   |
| 238026_at               | RPL35A      | Ribosomal protein L35a                                                                          | -3.03  | D   | -2.64  | D   | -2.83   | D   |
| 219762_s_at             | RPL36       | ribosomal protein L36                                                                           | -2.30  | D   | -2.46  | D   | -2.64   | D   |
| 224767_at               | RPL37       | Ribosomal protein L37                                                                           | -2.46  | D   | -2.46  | D   | -3.25   | D   |
| 224763_at               | RPL37       | Ribosomal protein L37                                                                           | -2.46  | D   | -3.03  | D   | -4.00   | D   |
| 214167_s_at             | RPLP0       | ribosomal protein, large, P0 /// similar to ribosomal protein P0                                | -2.14  | D   | -2.00  | D   | -2.30   | D   |
| 213427_at               | RPP40       | ribonuclease P 40kDa subunit                                                                    | -4.92  | D   | -3.73  | D   | -2.30   | D   |
| 214097_at               | RPS21       | ribosomal protein S21                                                                           | -2.30  | D   | -2.30  | D   | -2.14   | D   |
| 227722_at               | RPS23       | ribosomal protein S23                                                                           | -4.59  | D   | -4.00  | D   | -4.92   | D   |
| 236621_at               | RPS27       | ribosomal protein S27 (metallopanstimulin 1)                                                    | -6.96  | D   | -3.03  | D   | -2.64   | D   |
| 1568449_at              | RPS6KA3     | Ribosomal protein S6 kinase, 90kDa, polypeptide 3                                               | -2.14  | D   | -2.14  | D   | -3.25   | D   |
| 209567_at               | RRS1        | RRS1 ribosome biogenesis regulator homolog (S. cerevisiae)                                      | -2.00  | D   | -2.83  | D   | -2.64   | D   |
| 239868_at               | RSAFD1      | Radical S-adenosyl methionine and flavodoxin domains 1                                          | -2.00  | D   | -2.14  | D   | -13.00  | D   |
| 212018_s_at             | RSL1D1      | ribosomal L1 domain containing 1                                                                | -2.46  | D   | -2.83  | D   | -2.83   | D   |
| 232231_at               | RUNX2       | runt-related transcription factor 2                                                             | -9.19  | D   | -9.85  | D   | -64.00  | D   |
| 236859_at               | RUNX2       | runt-related transcription factor 2                                                             | -48.50 | D   | -48.50 | D   | -103.97 | D   |
| 237456_at               | RYBP        | RING1 and YY1 binding protein                                                                   | -2.83  | D   | -2.00  | D   | -2.30   | D   |
| 209686_at               | S100B       | S100 calcium binding protein, beta (neural)                                                     | -36.76 | D   | 128.00 | D   | -25.99  | D   |
| 1559882_at              | SAMHD1      | SAM domain and HD domain 1                                                                      | -8.57  | D   | -2.83  | D   | -2.46   | D   |
| 203408_s_at             | SATB1       | special AT-rich sequence binding protein 1 (binds to nuclear matrix/scaffold-associating DNA's) | -5.28  | D   | -6.96  | D   | -3.03   | D   |
| 244267_at               | SATB1       | Special AT-rich sequence binding protein 1 (binds to nuclear matrix/scaffold-associating DNA's) | -9.85  | D   | -13.00 | D   | -22.63  | D   |
| 240326_at               | SBF2        | SET binding factor 2                                                                            | -8.57  | D   | -2.46  | D   | -4.29   | D   |
| 237137_at               | SCARNA2     | small Cajal body-specific RNA 2                                                                 | -2.14  | D   | -4.29  | D   | -4.59   | D   |
| 235652_at               | SCML1       | Sex comb on midleg-like 1 (Drosophila)                                                          | -6.96  | D   | -2.14  | D   | -97.01  | D   |
| 1556472_s_at            | SCML4       | sex comb on midleg-like 4 (Drosophila)                                                          | -3.03  | D   | -4.29  | D   | -2.64   | D   |
| 230058_at               | SDCCAG3     | serologically defined colon cancer antigen 3                                                    | -2.00  | D   | -2.46  | D   | -2.46   | D   |
| 242064_at               | SDK2        | sidekick homolog 2 (chicken)                                                                    | -2.64  | D   | -25.99 | D   | -14.93  | D   |
| 221931_s_at             | SEH1L       | SEH1-like (S. cerevisiae)                                                                       | -2.00  | D   | -3.03  | D   | -2.14   | D   |
| 212812_at               | SERINC5     | Serine incorporator 5                                                                           | -4.59  | D   | -2.83  | D   | -13.93  | D   |
| 241494_at               | SERINC5     | Serine incorporator 5                                                                           | -73.52 | D   | -17.15 | D   | -32.00  | D   |
| 218346_s_at             | SESN1       | sestrin 1                                                                                       | -3.73  | D   | -2.83  | D   | -2.83   | D   |
| 243546_at               | SESN3       | Sestrin 3                                                                                       | -8.00  | D   | -8.00  | D   | -5.66   | D   |
| 210172_at               | SF1         | splicing factor 1                                                                               | -4.92  | D   | -2.64  | D   | -2.00   | D   |
| 219513_s_at             | SH2D3A      | SH2 domain containing 3A                                                                        | -6.06  | D   | -13.00 | D   | -6.06   | D   |
| 204019_s_at             | SH3YL1      | SH3 domain containing, Ysc84-like 1 (S. cerevisiae)                                             | -4.59  | D   | -7.46  | D   | -4.59   | D   |
| 1560171_at              | SHPRH       | SNF2 histone linker PHD RING helicase                                                           | -2.46  | D   | -4.00  | D   | -3.48   | D   |
| 239600_at               | SIPA1L1     | Signal-induced proliferation-associated 1 like 1                                                | -7.46  | D   | -2.30  | D   | -3.25   | D   |
| 220485_s_at             | SIRPG       | signal-regulatory protein gamma                                                                 | -19.70 | D   | -42.22 | D   | -45.25  | D   |
| 206181_at               | SLAMF1      | signaling lymphocytic activation molecule family member 1                                       | -4.59  | D   | -5.66  | D   | -17.15  | D   |
| 219915_s_at             | SLC16A10    | solute carrier family 16 (monocarboxylic acid transporters), member 10                          | -84.45 | D   | -45.25 | D   | -137.19 | D   |
| 222939_s_at             | SLC16A10    | solute carrier family 16 (monocarboxylic acid transporters), member 10                          | -19.70 | D   | -13.93 | D   | -11.31  | D   |
| 207057_at               | SLC16A7     | solute carrier family 16 (monocarboxylic acid transporters), member 7                           | -2.46  | D   | -4.00  | D   | -2.30   | D   |
| 210807_s_at             | SLC16A7     | solute carrier family 16 (monocarboxylic acid transporters), member 7                           | -2.30  | D   | -2.64  | D   | -2.64   | D   |
| 209267_s_at             | SLC39A8     | solute carrier family 39 (zinc transporter), member 8                                           | -4.29  | D   | -2.83  | D   | -5.66   | D   |
| 223044_at               | SLC40A1     | solute carrier family 40 (iron-regulated transporter), member 1                                 | -2.46  | D   | -4.29  | D   | -39.40  | D   |
| 203579_s_at             | SLC7A6      | solute carrier family 7 (cationic amino acid transporter, y+ system), member 6                  | -2.83  | D   | -2.14  | D   | -5.28   | D   |
| 203580_s_at             | SLC7A6      | solute carrier family 7 (cationic amino acid transporter, y+ system), member 6                  | -6.96  | D   | -6.06  | D   | -6.50   | D   |
| 1553055_a_at            | SLFN5       | schlafen family member 5                                                                        | -2.14  | D   | -2.14  | D   | -2.46   | D   |
| 243999_at               | SLFN5       | schlafen family member 5                                                                        | -2.00  | D   | -2.30  | D   | -3.25   | D   |
| 1558937_s_at            | SMA3        | SMA3                                                                                            | -3.73  | D   | -2.14  | D   | -3.25   | D   |
| 239448_at               | SMAD3       | SMAD, mothers against DPP homolog 3 (Drosophila)                                                | -8.00  | D   | -2.30  | D   | -4.59   | D   |
| 244357_at               | SMAP1L      | Stromal membrane-associated protein 1-like                                                      | -6.06  | D   | -4.29  | D   | -3.73   | D   |
| 241620_at               | SMCHD1      | structural maintenance of chromosomes flexible hinge domain containing 1                        | -2.64  | D   | -2.83  | D   | -34.30  | D   |
| 239784_at               | SMYD3       | SET and MYND domain containing 3                                                                | -4.29  | D   | -2.83  | D   | -2.14   | D   |
| 225220_at               | SNORA24     | Small nucleolar RNA, H/ACA box 24                                                               | -3.03  | D   | -2.14  | D   | -4.00   | D   |
| 207474_at               | SNRK        | SNF related kinase                                                                              | -5.66  | D   | -5.66  | D   | -2.14   | D   |
| 223027_at               | SNX9        | sorting nexin 9                                                                                 | -10.56 | D   | -4.00  | D   | -238.86 | D   |
| 223028_s_at             | SNX9        | sorting nexin 9                                                                                 | -3.03  | D   | -2.46  | D   | -9.85   | D   |
| 203509_at               | SORL1       | sortilin-related receptor, L(DLR class) A repeats-containing                                    | -4.00  | D   | -3.48  | D   | -16.00  | D   |
| 230707_at               | SORL1       | sortilin-related receptor, L(DLR class) A repeats-containing                                    | -6.06  | D   | -4.92  | D   | -21.11  | D   |

| AFFYMETRIX PROBE SET ID | GENE SYMBOL | GENE TITLE                                                                        | FC#22  | I/D | FC#2   | I/D | FC#26   | I/D |
|-------------------------|-------------|-----------------------------------------------------------------------------------|--------|-----|--------|-----|---------|-----|
| 1555882_at              | SPIN3       | spindlin family, member 3                                                         | -2.83  | D   | -4.59  | D   | -45.25  | D   |
| 206310_at               | SPINK2      | serine peptidase inhibitor, Kazal type 2 (acrosin-trypsin inhibitor)              | -24.25 | D   | -9.19  | D   | -22.63  | D   |
| 202524_s_at             | SPOCK2      | sparc/osteonectin, cwcv and kazal-like domains proteoglycan (testican) 2          | -6.96  | D   | -3.48  | D   | -7.46   | D   |
| 200672_x_at             | SPTBN1      | spectrin, beta, non-erythrocytic 1                                                | -2.64  | D   | -2.64  | D   | -4.29   | D   |
| 212071_s_at             | SPTBN1      | spectrin, beta, non-erythrocytic 1                                                | -6.50  | D   | -6.50  | D   | -4.00   | D   |
| 1562442_a_at            | SSBP1       | single-stranded DNA binding protein 1                                             | -2.14  | D   | -2.14  | D   | -3.48   | D   |
| 1557813_at              | SSBP2       | Single-stranded DNA binding protein 2                                             | -4.29  | D   | -2.14  | D   | -13.00  | D   |
| 1561690_at              | SSBP2       | Single-stranded DNA binding protein 2                                             | -4.92  | D   | -2.64  | D   | -8.57   | D   |
| 203787_at               | SSBP2       | single-stranded DNA binding protein 2                                             | -3.48  | D   | -2.30  | D   | -34.30  | D   |
| 1560306_at              | SSH2        | Slingshot homolog 2 (Drosophila)                                                  | -2.14  | D   | -2.64  | D   | -2.30   | D   |
| 230970_at               | SSH2        | Slingshot homolog 2 (Drosophila)                                                  | -7.46  | D   | -13.00 | D   | -4.29   | D   |
| 222557_at               | STMN3       | stathmin-like 3                                                                   | -5.66  | D   | -4.00  | D   | -8.57   | D   |
| 223245_at               | STRBP       | spermatid perinuclear RNA binding protein                                         | -2.83  | D   | -4.92  | D   | -5.66   | D   |
| 229513_at               | STRBP       | Spermatid perinuclear RNA binding protein                                         | -11.31 | D   | -14.93 | D   | -11.31  | D   |
| 233251_at               | STRBP       | Spermatid perinuclear RNA binding protein                                         | -73.52 | D   | -17.15 | D   | -14.93  | D   |
| 233252_s_at             | STRBP       | spermatid perinuclear RNA binding protein                                         | -4.29  | D   | -6.96  | D   | -5.66   | D   |
| 238462_at               | STS-1       | Cbl-interacting protein Sts-1                                                     | -3.73  | D   | -2.14  | D   | -3.48   | D   |
| 238303_at               | STT3B       | STT3, subunit of the oligosaccharyltransferase complex, homolog B (S. cerevisiae) | -4.29  | D   | -2.83  | D   | -2.46   | D   |
| 227182_at               | SUSD3       | sushi domain containing 3                                                         | -8.00  | D   | -4.92  | D   | -59.71  | D   |
| 202565_s_at             | SVIL        | supervillin                                                                       | -4.00  | D   | -2.30  | D   | -13.00  | D   |
| 242245_at               | SYDE2       | Synapse defective 1, Rho GTPase, homolog 2 (C. elegans)                           | -42.22 | D   | -21.11 | D   | -111.43 | D   |
| 244568_at               | SYNE2       | Spectrin repeat containing, nuclear envelope 2                                    | -6.50  | D   | -6.06  | D   | -2.14   | D   |
| 210612_s_at             | SYNJ2       | synaptojanin 2                                                                    | -68.59 | D   | -59.71 | D   | -18.38  | D   |
| 212828_at               | SYNJ2       | synaptojanin 2                                                                    | -5.28  | D   | -7.46  | D   | -4.29   | D   |
| 219156_at               | SYNJ2BP     | synaptojanin 2 binding protein                                                    | -4.00  | D   | -3.48  | D   | -4.00   | D   |
| 201260_s_at             | SYPL1       | synaptophysin-like 1                                                              | -2.46  | D   | -2.46  | D   | -6.96   | D   |
| 227884_at               | TAF15       | TAF15 RNA polymerase II, TATA box binding protein (TBP)-associated factor, 68kDa  | -3.03  | D   | -2.64  | D   | -2.83   | D   |
| 241885_at               | TAF15       | TAF15 RNA polymerase II, TATA box binding protein (TBP)-associated factor, 68kDa  | -3.25  | D   | -4.29  | D   | -3.03   | D   |
| 235020_at               | TAF4B       | TAF4b RNA polymerase II, TATA box binding protein (TBP)-associated factor, 105kDa | -6.06  | D   | -6.06  | D   | -9.19   | D   |
| 229723_at               | TAGAP       | T-cell activation GTPase activating protein                                       | -2.83  | D   | -6.50  | D   | -2.83   | D   |
| 236450_at               | TARSL2      | Threonyl-tRNA synthetase-like 2                                                   | -5.28  | D   | -13.93 | D   | -2.14   | D   |
| 241997_at               | TAS2R14     | Taste receptor, type 2, member 14                                                 | -5.66  | D   | -3.25  | D   | -2.30   | D   |
| 234042_at               | TAS2R45     | taste receptor, type 2, member 45                                                 | -2.46  | D   | -2.64  | D   | -2.64   | D   |
| 203386_at               | TBC1D4      | TBC1 domain family, member 4                                                      | -4.59  | D   | -2.64  | D   | -9.19   | D   |
| 203387_s_at             | TBC1D4      | TBC1 domain family, member 4                                                      | -4.59  | D   | -2.46  | D   | -18.38  | D   |
| 1556054_at              | TBC1D8      | TBC1 domain family, member 8 (with GRAM domain)                                   | -2.30  | D   | -3.25  | D   | -2.83   | D   |
| 336_at                  | TBXA2R      | thromboxane A2 receptor                                                           | -10.56 | D   | -4.00  | D   | -34.30  | D   |
| 226388_at               | TCEA3       | transcription elongation factor A (SII), 3                                        | -6.06  | D   | -9.19  | D   | -32.00  | D   |
| 204045_at               | TCEAL1      | transcription elongation factor A (SII)-like 1                                    | -2.64  | D   | -2.30  | D   | -6.06   | D   |
| 224819_at               | TCEAL8      | transcription elongation factor A (SII)-like 8                                    | -2.00  | D   | -2.30  | D   | -2.30   | D   |
| 229706_at               | TCERG1      | transcription elongation regulator 1                                              | -3.25  | D   | -3.03  | D   | -3.48   | D   |
| 205254_x_at             | TCF7        | transcription factor 7 (T-cell specific, HMG-box)                                 | -11.31 | D   | -12.13 | D   | -10.56  | D   |
| 205255_x_at             | TCF7        | transcription factor 7 (T-cell specific, HMG-box)                                 | -6.96  | D   | -6.06  | D   | -5.28   | D   |
| 210875_s_at             | TCF8        | transcription factor 8 (represses interleukin 2 expression)                       | -7.46  | D   | -3.73  | D   | -8.57   | D   |
| 212758_s_at             | TCF8        | transcription factor 8 (represses interleukin 2 expression)                       | -4.59  | D   | -29.86 | D   | -8.00   | D   |
| 39318_at                | TCL1A       | T-cell leukemia/lymphoma 1A                                                       | -2.46  | D   | -6.96  | D   | -7.46   | D   |
| 1558702_at              | TEX10       | Testis expressed sequence 10                                                      | -2.46  | D   | -2.14  | D   | -3.03   | D   |
| 233692_at               | THADA       | Thyroid adenoma associated                                                        | -3.25  | D   | -5.66  | D   | -2.00   | D   |
| 1553118_at              | THEM4       | thioesterase superfamily member 4                                                 | -6.50  | D   | -5.28  | D   | -9.85   | D   |
| 229253_at               | THEM4       | thioesterase superfamily member 4                                                 | -4.29  | D   | -6.50  | D   | -10.56  | D   |
| 243492_at               | THEM4       | Thioesterase superfamily member 4                                                 | -6.96  | D   | -4.92  | D   | -8.00   | D   |
| 222931_s_at             | THNSL1      | threonine synthase-like 1 (bacterial)                                             | -4.00  | D   | -6.06  | D   | -6.96   | D   |
| 230651_at               | THOC2       | THO complex 2                                                                     | -5.28  | D   | -4.00  | D   | -2.00   | D   |
| 236978_at               | THRAP1      | Thyroid hormone receptor associated protein 1                                     | -3.48  | D   | -2.83  | D   | -2.14   | D   |
| 213135_at               | TIAM1       | T-cell lymphoma invasion and metastasis 1                                         | -3.25  | D   | -2.14  | D   | -12.13  | D   |
| 236524_at               | TM2D1       | TM2 domain containing 1                                                           | -4.59  | D   | -5.28  | D   | -2.83   | D   |
| 218930_s_at             | TMEM106B    | transmembrane protein 106B                                                        | -2.14  | D   | -3.03  | D   | -2.83   | D   |
| 222787_s_at             | TMEM106B    | transmembrane protein 106B                                                        | -3.03  | D   | -4.29  | D   | -2.83   | D   |
| 226529_at               | TMEM106B    | transmembrane protein 106B                                                        | -2.00  | D   | -3.48  | D   | -3.03   | D   |
| 228925_at               | TMEM116     | Transmembrane protein 116                                                         | -2.14  | D   | -2.00  | D   | -2.14   | D   |
| 213285_at               | TMEM30B     | transmembrane protein 30B                                                         | -2.64  | D   | -3.25  | D   | -2.64   | D   |
| 230493_at               | TMEM46      | transmembrane protein 46                                                          | -19.70 | D   | -13.93 | D   | -8.57   | D   |

| AFFYMETRIX PROBE SET ID | GENE SYMBOL | GENE TITLE                                                                 | FC#22  | I/D | FC#2   | I/D | FC#26   | I/D |
|-------------------------|-------------|----------------------------------------------------------------------------|--------|-----|--------|-----|---------|-----|
| 214833_at               | TMEM63A     | transmembrane protein 63A                                                  | -6.96  | D   | -8.00  | D   | -2.64   | D   |
| 222988_s_at             | TMEM9       | transmembrane protein 9                                                    | -2.30  | D   | -2.00  | D   | -3.48   | D   |
| 242827_x_at             | TNFAIP8     | Tumor necrosis factor, alpha-induced protein 8                             | -12.13 | D   | -19.70 | D   | -2.83   | D   |
| 231775_at               | TNFRSF10A   | tumor necrosis factor receptor superfamily, member 10a                     | -5.28  | D   | -3.48  | D   | -10.56  | D   |
| 219423_x_at             | TNFRSF25    | tumor necrosis factor receptor superfamily, member 25                      | -19.70 | D   | -13.00 | D   | -25.99  | D   |
| 210847_x_at             | TNFRSF25    | tumor necrosis factor receptor superfamily, member 25                      | -4.92  | D   | -32.00 | D   | -59.71  | D   |
| 206150_at               | TNFRSF7     | tumor necrosis factor receptor superfamily, member 7                       | -14.93 | D   | -34.30 | D   | -90.51  | D   |
| 207216_at               | TNFSF8      | tumor necrosis factor (ligand) superfamily, member 8                       | -4.00  | D   | -3.25  | D   | -17.15  | D   |
| 235735_at               | TNFSF8      | Tumor necrosis factor (ligand) superfamily, member 8                       | -6.50  | D   | -6.06  | D   | -17.15  | D   |
| 240254_at               | TNIK        | TRAF2 and NCK interacting kinase                                           | -6.50  | D   | -8.57  | D   | -2.14   | D   |
| 238277_at               | TNKS        | Tankyrase, TRF1-interacting ankyrin-related ADP-ribose polymerase          | -3.03  | D   | -8.00  | D   | -3.25   | D   |
| 230779_at               | TNRC6B      | trinucleotide repeat containing 6B                                         | -2.46  | D   | -3.25  | D   | -2.83   | D   |
| 237895_at               | TNRC6B      | Trinucleotide repeat containing 6B                                         | -6.50  | D   | -4.59  | D   | -2.14   | D   |
| 238468_at               | TNRC6B      | trinucleotide repeat containing 6B                                         | -2.83  | D   | -3.03  | D   | -2.30   | D   |
| 227156_at               | TNRC8       | trinucleotide repeat containing 8                                          | -8.00  | D   | -6.06  | D   | -128.00 | D   |
| 201689_s_at             | TPD52       | tumor protein D52                                                          | -2.30  | D   | -5.28  | D   | -6.96   | D   |
| 201690_s_at             | TPD52       | tumor protein D52                                                          | -2.14  | D   | -5.66  | D   | -4.29   | D   |
| 228818_at               | TPD52       | Tumor protein D52                                                          | -4.92  | D   | -6.50  | D   | -8.57   | D   |
| 239862_at               | TPD52       | Tumor protein D52                                                          | -22.63 | D   | -29.86 | D   | -3.25   | D   |
| 217394_at               | TRA@        | T cell receptor alpha locus                                                | -4.59  | D   | -2.30  | D   | -18.38  | D   |
| 234013_at               | TRA@        | T cell receptor alpha locus /// Clone PSA.S.31 T-cell receptor alpha chain | -6.06  | D   | -3.48  | D   | -29.86  | D   |
| 215411_s_at             | TRAF3IP2    | TRAF3 interacting protein 2                                                | -4.59  | D   | -4.59  | D   | -68.59  | D   |
| 234964_at               | TRDV2       | T cell receptor delta variable 2                                           | -4.29  | D   | -2.00  | D   | -78.79  | D   |
| 202478_at               | TRIB2       | tribbles homolog 2 (Drosophila)                                            | -3.03  | D   | -4.00  | D   | -2.83   | D   |
| 200990_at               | TRIM28      | tripartite motif-containing 28                                             | -2.00  | D   | -2.00  | D   | -4.00   | D   |
| 205802_at               | TRPC1       | transient receptor potential cation channel, subfamily C, member 1         | -3.73  | D   | -4.29  | D   | -5.66   | D   |
| 225485_at               | TSGA14      | testis specific, 14                                                        | -3.48  | D   | -2.64  | D   | -2.64   | D   |
| 227307_at               | TSPAN18     | Tetraspanin 18                                                             | -4.92  | D   | -4.00  | D   | -7.46   | D   |
| 241060_x_at             | TSPAN5      | Tetraspanin 5                                                              | -9.19  | D   | -16.00 | D   | -2.46   | D   |
| 1569472_s_at            | TTC3        | tetratricopeptide repeat domain 3                                          | -2.64  | D   | -2.14  | D   | -8.00   | D   |
| 213174_at               | TTC9        | tetratricopeptide repeat domain 9                                          | -9.85  | D   | -27.86 | D   | -48.50  | D   |
| 226181_at               | TUBE1       | tubulin, epsilon 1                                                         | -2.46  | D   | -2.64  | D   | -3.03   | D   |
| 206828_at               | TXK         | TXK tyrosine kinase                                                        | -19.70 | D   | -18.38 | D   | -32.00  | D   |
| 220418_at               | UBASH3A     | ubiquitin associated and SH3 domain containing, A                          | -4.92  | D   | -8.57  | D   | -4.29   | D   |
| 240139_at               | UBE2D2      | Ubiquitin-conjugating enzyme E2D 2 (UBC4/5 homolog, yeast)                 | -4.00  | D   | -2.14  | D   | -3.73   | D   |
| 215392_at               | USP3        | Ubiquitin specific peptidase 3                                             | -5.66  | D   | -2.30  | D   | -3.25   | D   |
| 238057_at               | USP45       | ubiquitin specific peptidase 45                                            | -2.00  | D   | -3.25  | D   | -2.64   | D   |
| 237465_at               | USP53       | Ubiquitin specific peptidase 53                                            | -2.14  | D   | -3.73  | D   | -68.59  | D   |
| 216775_at               | USP53       | ubiquitin specific peptidase 53                                            | -3.48  | D   | -48.50 | D   | -4.92   | D   |
| 231817_at               | USP53       | ubiquitin specific peptidase 53                                            | -3.73  | D   | -11.31 | D   | -19.70  | D   |
| 219675_s_at             | UXS1        | UDP-glucuronate decarboxylase 1                                            | -5.28  | D   | -3.25  | D   | -6.50   | D   |
| 225583_at               | UXS1        | UDP-glucuronate decarboxylase 1                                            | -5.66  | D   | -3.25  | D   | -9.19   | D   |
| 205019_s_at             | VIPR1       | vasoactive intestinal peptide receptor 1                                   | -6.50  | D   | -3.48  | D   | -39.40  | D   |
| 234370_at               | VSIG1       | V-set and immunoglobulin domain containing 1                               | -13.93 | D   | -12.13 | D   | -55.72  | D   |
| 243764_at               | VSIG1       | V-set and immunoglobulin domain containing 1                               | -8.57  | D   | -19.70 | D   | -10.56  | D   |
| 231495_at               | VT11A       | Vesicle transport through interaction with t-SNAREs homolog 1A             | -4.92  | D   | -5.66  | D   | -2.14   | D   |
| 233323_at               | VT11A       | Vesicle transport through interaction with t-SNAREs homolog 1A             | -12.13 | D   | -3.25  | D   | -2.00   | D   |
| 220917_s_at             | WDR19       | WD repeat domain 19                                                        | -14.93 | D   | -9.85  | D   | -4.59   | D   |
| 214662_at               | WDR43       | WD repeat domain 43                                                        | -2.14  | D   | -2.83  | D   | -3.03   | D   |
| 237208_at               | WDR61       | WD repeat domain 61                                                        | -2.64  | D   | -4.59  | D   | -3.73   | D   |
| 1557261_at              | WHDC1L1     | WAS protein homology region 2 domain containing 1-like 1                   | -4.92  | D   | -4.29  | D   | -16.00  | D   |
| 213908_at               | WHDC1L1     | WAS protein homology region 2 domain containing 1-like 1                   | -3.25  | D   | -3.73  | D   | -36.76  | D   |
| 1556595_at              | WWOX        | WW domain containing oxidoreductase                                        | -5.66  | D   | -5.66  | D   | -4.59   | D   |
| 1563460_at              | WWOX        | WW domain containing oxidoreductase                                        | -34.30 | D   | -14.93 | D   | -25.99  | D   |
| 237035_at               | WWOX        | WW domain containing oxidoreductase                                        | -48.50 | D   | -5.28  | D   | -4.00   | D   |
| 242099_at               | WWOX        | WW domain containing oxidoreductase                                        | -6.50  | D   | -2.46  | D   | -6.06   | D   |
| 242801_at               | WWOX        | WW domain containing oxidoreductase                                        | -18.38 | D   | -4.00  | D   | -14.93  | D   |
| 214567_s_at             | XCL1 / XCL2 | chemokine (C motif) ligand 1 / 2                                           | -9.19  | D   | -2.46  | D   | -9.19   | D   |
| 206366_x_at             | XCL2        | chemokine (C motif) ligand 2                                               | -9.85  | D   | -2.83  | D   | -6.96   | D   |
| 1557065_at              | YLPM1       | YLP motif containing 1                                                     | -4.59  | D   | -3.25  | D   | -2.46   | D   |
| 243310_at               | YLPM1       | YLP motif containing 1                                                     | -13.00 | D   | -14.93 | D   | -3.25   | D   |
| 205883_at               | ZBTB16      | zinc finger and BTB domain containing 16                                   | -3.48  | D   | -2.83  | D   | -8.57   | D   |

| AFFYMETRIX PROBE SET ID | GENE SYMBOL | GENE TITLE                               | FC#22  | I/D | FC#2   | I/D | FC#26   | I/D |
|-------------------------|-------------|------------------------------------------|--------|-----|--------|-----|---------|-----|
| 222357_at               | ZBTB20      | zinc finger and BTB domain containing 20 | -8.00  | D   | -6.06  | D   | -2.83   | D   |
| 232929_at               | ZBTB20      | Zinc finger and BTB domain containing 20 | -5.28  | D   | -8.00  | D   | -2.83   | D   |
| 237803_x_at             | ZBTB20      | Zinc finger and BTB domain containing 20 | -6.06  | D   | -5.28  | D   | -2.30   | D   |
| 239955_at               | ZBTB20      | Zinc finger and BTB domain containing 20 | -6.06  | D   | -6.50  | D   | -2.14   | D   |
| 240216_at               | ZBTB20      | Zinc finger and BTB domain containing 20 | -6.06  | D   | -17.15 | D   | -2.00   | D   |
| 1559263_s_at            | ZC3H12D     | zinc finger CCCH-type containing 12D     | -2.64  | D   | -2.14  | D   | -2.14   | D   |
| 238875_at               | ZC3H6       | Zinc finger CCCH-type containing 6       | -4.92  | D   | -5.66  | D   | -3.03   | D   |
| 1565913_at              | ZC3HAV1     | Zinc finger CCCH-type, antiviral 1       | -4.00  | D   | -3.48  | D   | -3.25   | D   |
| 230713_at               | ZCCHC11     | Zinc finger, CCHC domain containing 11   | -4.92  | D   | -3.48  | D   | -2.14   | D   |
| 212655_at               | ZCCHC14     | zinc finger, CCHC domain containing 14   | -5.28  | D   | -6.06  | D   | -3.25   | D   |
| 1556543_at              | ZCCHC7      | Zinc finger, CCHC domain containing 7    | -6.06  | D   | -9.85  | D   | -2.14   | D   |
| 230332_at               | ZCCHC7      | Zinc finger, CCHC domain containing 7    | -9.19  | D   | -7.46  | D   | -4.00   | D   |
| 234032_at               | ZCCHC7      | Zinc finger, CCHC domain containing 7    | -6.96  | D   | -6.50  | D   | -2.83   | D   |
| 242562_at               | ZCSL3       | Zinc finger, CSL-type containing 3       | -2.30  | D   | -4.00  | D   | -2.64   | D   |
| 243528_at               | ZDHHC2      | Zinc finger, DHHC-type containing 2      | -4.00  | D   | -3.25  | D   | -3.25   | D   |
| 1558700_s_at            | ZFP260      | zinc finger protein 260                  | -2.14  | D   | -6.50  | D   | -2.00   | D   |
| 235728_at               | ZFP3        | zinc finger protein 3 homolog (mouse)    | -3.48  | D   | -3.73  | D   | -3.48   | D   |
| 238970_at               | ZFR         | Zinc finger RNA binding protein          | -3.25  | D   | -2.46  | D   | -2.83   | D   |
| 226344_at               | ZMAT1       | zinc finger, matrin type 1               | -4.59  | D   | -2.46  | D   | -5.66   | D   |
| 1552634_a_at            | ZNF101      | zinc finger protein 101                  | -2.64  | D   | -5.66  | D   | -3.48   | D   |
| 206314_at               | ZNF167      | zinc finger protein 167                  | -2.14  | D   | -3.73  | D   | -2.30   | D   |
| 210282_at               | ZNF198      | zinc finger protein 198                  | -2.83  | D   | -2.30  | D   | -3.73   | D   |
| 214823_at               | ZNF204      | zinc finger protein 204                  | -6.06  | D   | -36.76 | D   | -25.99  | D   |
| 229765_at               | ZNF207      | Zinc finger protein 207                  | -2.46  | D   | -3.03  | D   | -2.14   | D   |
| 236075_s_at             | ZNF232      | Zinc finger protein 232                  | -2.14  | D   | -2.83  | D   | -2.64   | D   |
| 212774_at               | ZNF238      | zinc finger protein 238                  | -3.73  | D   | -2.30  | D   | -18.38  | D   |
| 236659_x_at             | ZNF277      | Zinc finger protein 277                  | -2.64  | D   | -2.30  | D   | -2.64   | D   |
| 228392_at               | ZNF302      | zinc finger protein 302                  | -2.64  | D   | -2.46  | D   | -2.14   | D   |
| 228393_s_at             | ZNF302      | zinc finger protein 302                  | -2.83  | D   | -3.48  | D   | -2.30   | D   |
| 228208_x_at             | ZNF354C     | Zinc finger protein 354C                 | -4.59  | D   | -2.14  | D   | -32.00  | D   |
| 1557260_a_at            | ZNF382      | zinc finger protein 382                  | -2.83  | D   | -9.85  | D   | -194.01 | D   |
| 1561687_a_at            | ZNF382      | zinc finger protein 382                  | -7.46  | D   | -13.00 | D   | -29.86  | D   |
| 218149_s_at             | ZNF395      | zinc finger protein 395                  | -6.06  | D   | -4.00  | D   | -10.56  | D   |
| 221123_x_at             | ZNF395      | zinc finger protein 395                  | -25.99 | D   | -8.57  | D   | -11.31  | D   |
| 236474_at               | ZNF395      | Zinc finger protein 395                  | -7.46  | D   | -4.92  | D   | -8.00   | D   |
| 239619_at               | ZNF395      | Zinc finger protein 395                  | -6.96  | D   | -5.28  | D   | -9.19   | D   |
| 223216_x_at             | ZNF395      | Zinc finger protein 395                  | -25.99 | D   | -22.63 | D   | -36.76  | D   |
| 232693_s_at             | ZNF395      | Zinc finger protein 395                  | -32.00 | D   | -21.11 | D   | -45.25  | D   |
| 233239_at               | ZNF407      | Zinc finger protein 407                  | -4.00  | D   | -2.64  | D   | -4.92   | D   |
| 218312_s_at             | ZNF447      | zinc finger protein 447                  | -6.96  | D   | -6.06  | D   | -34.30  | D   |
| 215307_at               | ZNF529      | Zinc finger protein 529                  | -3.03  | D   | -3.25  | D   | -12.13  | D   |
| 235121_at               | ZNF542      | zinc finger protein 542                  | -3.48  | D   | -9.85  | D   | -2.46   | D   |
| 1559401_a_at            | ZNF609      | Zinc finger protein 609                  | -9.85  | D   | -11.31 | D   | -2.83   | D   |
| 1566166_at              | ZNF650      | Zinc finger protein 650                  | -4.59  | D   | -3.48  | D   | -2.14   | D   |
| 231950_at               | ZNF658      | zinc finger protein 658                  | -3.03  | D   | -17.15 | D   | -2.30   | D   |
| 1560562_a_at            | ZNF677      | Zinc finger protein 677                  | -19.70 | D   | -36.76 | D   | -27.86  | D   |
| 228974_at               | ZNF677      | Zinc finger protein 677                  | -6.96  | D   | -17.15 | D   | -6.96   | D   |
| 1557270_at              | ZNF69       | Zinc finger protein 69                   | -2.83  | D   | -4.59  | D   | -2.30   | D   |
